1 **A physical mechanism of TANGO1-mediated bulky cargo**  
2 **export**

3  
4

5 Ishier Raote<sup>1,\*,#</sup>, Morgan Chabanon<sup>2,\*</sup>, Nikhil Walani<sup>3</sup>, Marino Arroyo<sup>3,4,5</sup>, Maria F. Garcia-  
6 Parajo<sup>2,6</sup>, Vivek Malhotra<sup>1,6,7,#</sup>, and Felix Campelo<sup>2,#</sup>

7

8 <sup>1</sup> Centre for Genomic Regulation (CRG), The Barcelona Institute of Science and Technology,  
9 Barcelona, Spain.

10 <sup>2</sup> ICFO-Institut de Ciències Fòniques, The Barcelona Institute of Science and Technology,  
11 Castelldefels (Barcelona), Spain.

12 <sup>3</sup> Universitat Politècnica de Catalunya-BarcelonaTech, E-08034, Barcelona, Spain.

13 <sup>4</sup> Institute for Bioengineering of Catalonia, The Barcelona Institute of Science and  
14 Technology, E-08028, Barcelona, Spain.

15 <sup>5</sup> Centre Internacional de Mètodes Numèrics en Enginyeria (CIMNE), 08034 Barcelona,  
16 Spain

17 <sup>6</sup> Institució Catalana de Recerca i Estudis Avançats (ICREA), Barcelona, Spain.

18 <sup>7</sup> Universitat Pompeu Fabra (UPF), Barcelona, Spain.

19 \* These authors contributed equally

20 # Co-corresponding authors

21

22

23 **Corresponding authors:**

24 Ishier Raote

25 e-mail: [ishier.raote@crg.eu](mailto:ishier.raote@crg.eu)

26

27 Vivek Malhotra

28 e-mail: [vivek.malhotra@crg.eu](mailto:vivek.malhotra@crg.eu)

29

30 Felix Campelo

31 e-mail: [felix.campelo@icfo.eu](mailto:felix.campelo@icfo.eu)

32 **ABSTRACT**

33

34 **The endoplasmic reticulum (ER)-resident transmembrane protein TANGO1 assembles**  
35 **into a ring around COPII subunits at ER exit sites (ERES), and links cytosolic membrane-**  
36 **remodeling machinery, tethers, and ER-Golgi intermediate compartment (ERGIC)**  
37 **membranes to procollagens in the ER lumen (Raote *et al.*, 2018). This arrangement is**  
38 **proposed to create a route for direct transfer of procollagens from ERES to ERGIC**  
39 **membranes via a tunnel. Here, we present a physical model in which TANGO1 forms a**  
40 **linear filament that wraps around COPII lattices at ERES to stabilize the neck of a**  
41 **growing transport intermediate. Importantly, our results show that TANGO1 is able to**  
42 **stabilize ERES-ERGIC opening by regulating ER membrane tension to allow procollagen**  
43 **loading and export from the ER. Altogether, our theoretical approach provides a**  
44 **mechanical framework of TANGO1 as a membrane tension regulator to control**  
45 **procollagen export from the ER.**

## 46 INTRODUCTION

47 Multicellularity requires not only the secretion of signaling proteins –such as neurotransmitters,  
48 cytokines, and hormones– to regulate cell-to-cell communication, but also of biomechanical  
49 matrices composed primarily of proteins such as collagens, which form the extracellular matrix  
50 (ECM) (Kadler *et al.*, 2007; Mouw, Ou and Weaver, 2014). These extracellular assemblies of  
51 collagens are necessary for tissue biogenesis and maintenance. Collagens, like all  
52 conventionally secreted proteins, contain a signal sequence that targets their entry into the  
53 endoplasmic reticulum (ER). After their glycosylation, procollagens fold and trimerize into a  
54 characteristic triple-helical structure, which is supposed to be very rigid and long (McCaughy  
55 and Stephens, 2019). These bulky procollagens are then exported from the ER at specialized  
56 export domains, termed ER exit sites (ERES). ERES are a fascinating subdomain of the ER,  
57 but a basic understanding of how these domains are created and segregated from the rest of the  
58 ER for the purpose of cargo export still remains a challenge. The discovery of TANGO1 as a  
59 key ERES-resident player, has made the processes of procollagen export and the organization  
60 of ERES amenable to molecular analysis (Bard *et al.*, 2006; Saito *et al.*, 2009; Wilson *et al.*,  
61 2011).

62 In the lumen of the ER, the SH3-like domain of TANGO1 binds procollagen via HSP47 (Saito  
63 *et al.*, 2009; Ishikawa *et al.*, 2016) (**Figure 1A**). On the cytoplasmic side, TANGO1 has a  
64 proline-rich domain (PRD) and two coiled-coil domains (CC1 and CC2) (**Figure 1A**). The PRD  
65 of TANGO1 interacts with the COPII components Sec23A and Sec16 (Saito *et al.*, 2009; Ma  
66 and Goldberg, 2016; Maeda, Katada and Saito, 2017); the CC1 domain binds the  
67 NBAS/RINT1/ZW10 (NRZ) tethering complex to recruit ER-Golgi intermediate compartment  
68 (ERGIC) membranes and also drives self-association amongst TANGO1 proteins (Santos *et al.*,  
69 2015; Raote *et al.*, 2018); and the CC2 domain oligomerizes with proteins of the TANGO1  
70 family (such as cTAGE5) (Saito *et al.*, 2011; Maeda, Saito and Katada, 2016). Both cytosolic  
71 and lumenal activities of TANGO1 are critical for its function. A recent report identified a  
72 disease-causing mutation in TANGO1 in a human family, which results in a substantial fraction  
73 of TANGO1 protein being truncated lacking its cytosolic functions leading to various skeletal  
74 abnormalities and collagen export defects (Lekszas *et al.*, 2020). Recently, we visualized  
75 procollagen export domains with high lateral spatial resolution using stimulated emission  
76 depletion (STED) nanoscopy in mammalian tissue cultured cells (Raote *et al.*, 2017, 2018).  
77 These studies revealed that TANGO1 organizes at the ERES into ring-like structures, of ~200  
78 nm in lumenal diameter, that corral COPII components. Moreover, two independent studies  
79 showed that TANGO1 rings are also present in *Drosophila melanogaster* (Liu *et al.*, 2017;  
80 Reynolds *et al.*, 2019).

81 To further extend these findings, we combined STED nanoscopy with genetic manipulations  
82 and established that TANGO1 rings are organized by (i) lateral self-interactions amongst  
83 TANGO1-like proteins, (ii) radial interactions with COPII subunits, and (iii) tethering of small  
84 ER-Golgi intermediate compartment (ERGIC) vesicles to assist in the formation of a  
85 procollagen-containing export intermediate (Raote *et al.*, 2018). Overall, the data suggest a  
86 mechanism whereby TANGO1 assembles into a ring, which selectively gathers and organizes  
87 procollagen, remodels COPII budding machinery, and recruits ERGIC membranes for the  
88 formation of a procollagen-containing transport intermediate. However, the biophysical  
89 mechanisms governing these events and how they are regulated by TANGO1 remain unknown.

90 Here, we present and analyze a biophysical model of TANGO1 ring assembly around  
 91 polymerizing COPII-coated structures for procollagen export. Our model allows us to address:  
 92 (i) the physical mechanisms by which TANGO1 and its interactors can assemble into functional  
 93 rings at ERES, forming a fence around COPII coat components; and (ii) whether and how a  
 94 TANGO1 fence can couple COPII polymerization and regulate membrane tension to create an  
 95 export route for procollagens at the ERES. Overall, we propose a novel mechanism of  
 96 TANGO1-regulated procollagen export, which consists of two sequential steps. First,  
 97 TANGO1 rings, at the edge of a polymerizing COPII structure, stabilize the neck of a growing  
 98 procollagen-containing export intermediate and thus prevent premature fission. Second, carrier  
 99 growth can be stimulated by the ability of TANGO1 to act as a membrane tension regulator by  
 100 tethering and fusing ERGIC membranes. Importantly, we show that TANGO1-mediated local  
 101 reduction of the membrane tension at the ERES changes the free energy profile of the system  
 102 to promote carrier growth.

103

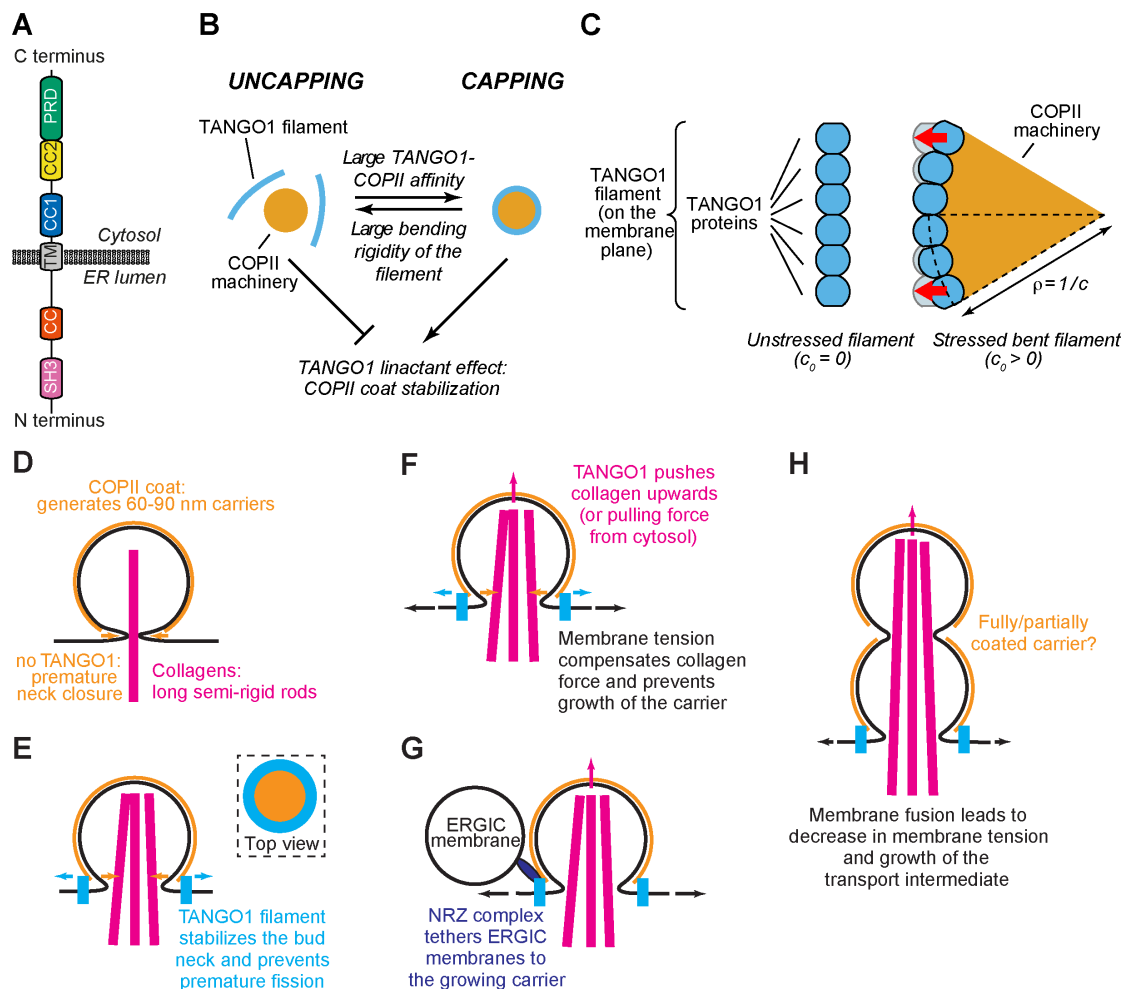

104

105 **Figure 1. Physical model of TANGO1-dependent transport intermediate formation.**

106 (A) Schematic representation of the domain structure and topology of TANGO1, indicating the SH3  
 107 domain, a luminal coiled-coiled domain (CC), the one and a half transmembrane region (TM), the coiled-  
 108 coiled 1 (CC1) and 2 (CC2) domains, and the PRD. (B) Schematic description of the TANGO1 ring  
 109 formation model. ERES consisting of COPII subunits assemble into in-plane circular lattices (orange),  
 110 whereas proteins of the TANGO1 family assemble into filaments by lateral protein-protein interactions  
 111 (light blue). A tug-of-war between the affinity of the TANGO1 filament to bind COPII subunits (promoting  
 112 capping of peripheral COPII subunits) and the resistance of the filament to be bent (promoting uncapping)

113 controls the capping-uncapping transition. Only when TANGO1 caps the COPII lattice, it acts as a  
114 linactant by stabilizing the peripheral COPII subunits. **(C)** Schematic representation of individual proteins  
115 that constitute a TANGO1 filament and of how filament bending is associated with elastic stress  
116 generation. Individual TANGO1 family proteins (blue shapes) bind each other in a way that is controlled  
117 by the structure of protein-protein binding interfaces, leading to formation of an unstressed filament of a  
118 certain preferred curvature,  $c_0$  (left cartoon, showing the case where  $c_0 = 0$ ). Filament bending can be  
119 caused by the capping of TANGO1 filament to peripheral COPII machinery (orange area), which  
120 generates a stressed bent filament of a certain radius of curvature,  $R = 1/c$  (right cartoon). Such  
121 deviations from the preferred shape (shown in light blue) are associated with elastic stress generation  
122 (red arrows point to the direction of the filament reaction forces to the generated stresses, which  
123 correspond to the direction of recovery of the filament preferred shape). **(D)** In the absence of functional  
124 TANGO1, COPII coated spherical vesicles assemble normally, generating spherical carriers of between  
125 60–90 nm in size. Procollagens cannot be packed into such small carriers. **(E)** A TANGO1 filament siting  
126 at the base of a growing COPII patch encircles COPII components as experimentally observed (see top  
127 view in the top right subpanel) and packages procollagens to the export sites. This TANGO1 fence can  
128 serve to stabilize the neck of the transport carrier hence preventing the premature formation of a small  
129 carrier. **(F)** A possible cytosolically-directed force (procollagen pushing from the inside or a pulling force  
130 from the cytosol) can work in the direction of generating a large intermediate. By contrast, large membrane  
131 tensions work to prevent carrier elongation. **(G)** The NRZ complex (dark blue), which is recruited to the  
132 procollagen export sites by the TANGO1 TEER domain, tethers ERGIC53-containing membranes. **(H)**  
133 Fusion of these tethered membranes can lead to a local and transient decrease in the membrane tension,  
134 which can allow for the growth of the transport intermediate to be able to include the long semi-rigid  
135 procollagen molecules. Whether the intermediate is fully or only partially coated still remains unknown.

## 136 **PHYSICAL MODEL OF TANGO1-ASSISTED TRANSPORT** 137 **INTERMEDIATE FORMATION**

138 Can TANGO1 modulate the shape of a growing bud to accommodate large and complex  
139 cargoes? And, if so, would a TANGO1 ring structure be especially suited to achieve this task?  
140 To answer these questions, we assembled a physical model of transport intermediate formation  
141 that incorporates the effects of TANGO1 ring formation. In our model, we consider different  
142 scenarios under which TANGO1 can modulate the shape of COPII-dependent carriers. We first  
143 describe how TANGO1 rings can form around COPII patches and then propose a general model  
144 of carrier formation that includes the contribution of TANGO1 rings.

### 145 146 **QUALITATIVE DESCRIPTION OF TANGO1 RING ASSEMBLY**

147 To assess and rationalize the assembly of TANGO1 into rings at ERES, we propose a physical  
148 model built on the accumulated experimental data. First, we hypothesize that TANGO1 forms  
149 a filament that can be held together by lateral protein-protein interactions between TANGO1-  
150 family proteins (TANGO1, cTAGE5 and TANGO1-Short) (Raote *et al.*, 2018). This hypothesis  
151 is based on the following observations: (i) TANGO1 is seen in ring-like filamentous assemblies  
152 by STED nanoscopy (Raote *et al.*, 2017); (ii) there is a direct 1:1 binding between TANGO1  
153 and cTAGE5 CC2 domains (Saito *et al.*, 2011); (iii) TANGO1-Short and cTAGE5 can form  
154 oligomers and oligomeric complexes together with Sec12 and TANGO1 (Maeda, Saito and  
155 Katada, 2016); (iv) TANGO1 and TANGO1-Short can directly homo-dimerize by their CC1  
156 domains (Raote *et al.*, 2018); and (v) super-resolution live lattice SIM imaging of TANGO1 in  
157 the *D. melanogaster* larval salivary gland shows filament growth in ring formation (Reynolds  
158 *et al.*, 2019). Such a filament forms by the assembly of TANGO1-family proteins, which we  
159 propose occurs in a linear or quasi-linear fashion, rather than as a protein aggregate or protein  
160 cluster. Depending on the structural details of the interactions between TANGO1 proteins, the  
161 filament would tend to adopt a defined shape, and deviations from such a shape would  
162 necessitate the supply of external energy. In terms of elasticity of the filament, such a filament  
163 is subject to internal strains and stresses and therefore resists bending away from its preferred  
164 shape or curvature. Evidence for the existence of linear assemblies of transmembrane proteins  
165 has indeed been reported in the context of transmembrane actin-associated (TAN) lines that  
166 couple outer nuclear membrane components to actin cables (Luxton *et al.*, 2010).

167  
168 Second, TANGO1 binds the inner layer of the COPII coat (Saito *et al.*, 2009). We hypothesize  
169 that TANGO1 stabilizes the edges of the COPII lattice by binding to peripheral COPII subunits,  
170 thereby effectively reducing COPII lattice line energy at the ERES (Glick, 2017). COPII coat  
171 assembly at the ERES occurs by polymerization of the individual COPII subunits into a lattice  
172 (Aridor, 2018; Peotter *et al.*, 2019). This process starts with activation and membrane binding  
173 of the Sar1 GTPase, which recruits Sec23-Sec24 heterodimers that form the inner layer of the  
174 COPII coat. Subsequently, the second layer of the coat, composed of Sec13-Sec31 subunits, is  
175 recruited to the ERES, eventually leading to the budding of a COPII-coated vesicle. The free  
176 energy of coat polymerization includes the binding free energy of the COPII subunits, the  
177 elastic penalty of bending the membrane underneath, and also the line energy due to the  
178 unsatisfied binding sites of COPII subunits occupying the edges of the growing lattice (Saleem  
179 *et al.*, 2015). Because proteins of the TANGO1 family physically interact with the COPII  
180 components Sec23, Sec16, and Sec12, we hypothesize that by binding to COPII subunits placed  
181 at the periphery of the growing coat (Ma and Goldberg, 2016; Hutchings *et al.*, 2018; Raote *et*

182 *al.*, 2018), TANGO1 stabilizes the domain boundary, effectively reducing its line energy. In  
183 analogy to surfactants –molecules that adsorb into liquid-liquid two-dimensional interfaces  
184 decreasing their surface tension–, we propose that by binding to COPII subunits, TANGO1  
185 proteins act as line-active agents, or *linactants* (Trabelsi *et al.*, 2008). In the context of HIV  
186 gp41-mediated membrane fusion, linactant compounds, such as vitamin E, lower the interfacial  
187 line tension between different membrane domains to inhibit HIV fusion (Yang, Kiessling and  
188 Tamm, 2016).

189

190 Qualitatively, our model for TANGO1 ring assembly can be described as a tug-of-war between  
191 two different driving forces: the resistance to bending of TANGO1 filaments –driven by the  
192 nature of the TANGO1-TANGO1 protein interactions–, and the binding affinity of TANGO1  
193 proteins for peripheral COPII subunits. These different forces can control the formation of  
194 TANGO1 rings around COPII coats at ERES at different stages of transport intermediate  
195 formation. For instance, if the resistance to bending of the TANGO1 filament is relatively small  
196 or the binding affinity of TANGO1 for the COPII subunits is relatively large, the filament will  
197 easily wrap around COPII patches, forming a TANGO1 ring (a process we refer to as COPII  
198 wetting or *capping*) (**Figure 1B,C**). As a result, the linactant effect of TANGO1 on COPII-  
199 coated ERES that will reduce the line energy, thus limiting further growth of the COPII lattice  
200 and the size of the TANGO1 rings (**Figure 1B**). By contrast, if TANGO1 filaments are very  
201 rigid or the affinity of TANGO1 proteins for COPII subunits is low (for instance, in cells  
202 expressing mutants of TANGO1 with reduced or abrogated interaction to COPII proteins),  
203 COPII capping by the filament will be energetically unfavorable and as a result, TANGO1 will  
204 not act as a COPII linactant (**Figure 1B**).

205

## 206 **TANGO1-DEPENDENT TRANSPORT INTERMEDIATE FORMATION**

207 The formation of canonical coated transport carriers (such as COPI-, COPII-, or clathrin-coated  
208 carriers) relies on the polymerization on the membrane surface of a large-scale protein structure:  
209 the protein coat. Polymerized coats usually adopt spherical shapes, which bend the membrane  
210 underneath accordingly (Faini *et al.*, 2013), although helical arrangements of COPII coats have  
211 been proposed (Zanetti *et al.*, 2013; Ma and Goldberg, 2016). Coat polymerization promotes  
212 bending of the underlying membrane if the binding energy of the coat to the membrane is larger  
213 than the energy required to bend the membrane and if the coat structure is more rigid than the  
214 membrane (Derganc, Antonny and Čopič, 2013; Kozlov *et al.*, 2014; Saleem *et al.*, 2015).  
215 Hence, in the absence of a functional TANGO1, COPII coats generate standard 60-90 nm  
216 spherical transport carriers (**Figure 1D**). In this situation, the neck of the growing carrier  
217 prematurely closes without being able to fully incorporate long semi-rigid procollagen  
218 molecules, which are either not fully packaged or not efficiently recruited to the COPII export  
219 sites due to the lack of TANGO1 (**Figure 1D**). In our model for TANGO1 ring formation, we  
220 proposed that one of the potential roles of such a ring is to act as a linactant to stabilize free  
221 COPII subunits at the edge of the polymerized structure (Glick, 2017; Raote *et al.*, 2017) and  
222 hence prevent or kinetically delay the premature closure of the bud neck (**Figure 1E**).  
223 Moreover, mechanical forces directed towards the cytosolic side of the bud, either from the ER  
224 lumen (e.g. TANGO1 pushing procollagen upwards) or from the cytosol (e.g. molecular motors  
225 pulling on the growing bud), will induce growth of the transport intermediate (Derényi, Jülicher  
226 and Prost, 2002; Roux *et al.*, 2002; Koster *et al.*, 2003; Leduc *et al.*, 2004; Watson *et al.*, 2005;  
227 Pinot, Goud and Manneville, 2010) (**Figure 1F**). Such pulling forces can be counterbalanced  
228 by membrane tension, which generally acts as an inhibitory factor preventing bud formation  
229 (Saleem *et al.*, 2015; Hassinger *et al.*, 2017; Wu *et al.*, 2017) (**Figure 1F**). In parallel, TANGO1

230 recruits the NRZ complex that tethers ERGIC53-containing membranes in apposition to  
231 TANGO1 rings (Raote *et al.*, 2018) (**Figure 1G**). Fusion of such vesiculo-tubular structures to  
232 the budding site would deliver membrane lipids to the ER membrane, which rapidly and  
233 transiently drops local membrane tension, hence overcoming the tension-induced arrest in  
234 transport intermediate growth (**Figure 1H**). Mixing of membrane components is prevented by  
235 the particular structure of TANGO1 transmembrane helices, which create diffusion barrier  
236 (Raote *et al.*, 2020). The presence of long and rigid procollagen molecules (Buehler, 2008;  
237 McCaughey and Stephens, 2019) in the lumen of the immature carrier could sterically hinder  
238 the full closure of the necks between the subsequent spherical pearls, thus contributing to fission  
239 inhibition and enlargement of the transport intermediate (Peotter *et al.*, 2019) (**Figure 1H**). The  
240 shape and coat coverage of procollagen-containing export intermediates remain, to the best of  
241 our knowledge, a matter of speculation. Both large pearled tubes (**Figure 1H**) or cylindrical  
242 vesicles have been proposed to function at the level of the ER membrane (Bannykh, Rowe and  
243 Balch, 1996; Mironov *et al.*, 2003; Watson and Stephens, 2005; Zeuschner *et al.*, 2006;  
244 Robinson *et al.*, 2015; Gorur *et al.*, 2017; Omari *et al.*, 2018; Yuan *et al.*, 2018). Remarkably,  
245 multibudded, pearled-like structures have been observed in a COPII *in vitro* budding system  
246 (Bacia *et al.*, 2011). We recently proposed the alternative possibility that a short-lived, transient  
247 direct tunnel between the ER and the ERGIC/Golgi complex can allow for the directional export  
248 of cargoes from the ER (Raote and Malhotra, 2019). In our model, TANGO1 rings help prevent  
249 the fission of the carrier and thus allow for the formation of such tunnels between the ER and  
250 the ERGIC. Finally, although there is experimental evidence of tubular COPII polymerization  
251 *in vitro* as observed by cryo-electron tomography (Zanetti *et al.*, 2013; Hutchings *et al.*, 2018),  
252 COPII coats have a preference to polymerize into spherical structures. Hence, for the sake of  
253 clarity we will base our analytical model of membrane deformation by COPII coats on the  
254 assumption that COPII polymerization on the membrane imposes a spherical shape of fixed  
255 curvature to the underlying membrane. A more general model where the condition of imposed  
256 spherical curvature is relaxed is presented in **Appendix 1**.

257  
258 To quantitate the feasibility of the proposed pathway of transport intermediate growth (**Figure**  
259 **1D–H**), we developed a physical model that accounts for the relative contribution of each of  
260 the aforementioned factors to the overall free energy of the system. Such a model allows us to  
261 predict (i) the shape transitions from a planar membrane to incomplete buds and to large  
262 transport intermediates; and (ii) the formation of TANGO1 rings around COPII components,  
263 which we refer to as capping of COPII by TANGO1. Intuitively, one can see that COPII  
264 polymerization favors the formation of spherical buds, whereas TANGO1 linactant strength  
265 and filament bending prevent neck closure by capping incomplete COPII buds. Outward-  
266 directed forces promote the growth of large intermediates, whereas large membrane tension  
267 inhibits such a growth. Taking advantage of a recently developed theoretical model of  
268 membrane elasticity in the context of clathrin-coated vesicle formation (Saleem *et al.*, 2015),  
269 we expand on this model to include the contributions of TANGO1-like proteins in modulating  
270 COPII-dependent carrier formation, the description of which follows.

271  
272 We consider that the ER membrane is under a certain lateral tension,  $\sigma$ , and resists bending  
273 with a bending rigidity,  $\kappa_b$ . Growth of a COPII bud starts by COPII polymerization into a  
274 spherical shape of radius  $R$ , driven by the assembly of individual subunits. In physical terms,  
275 lattice growth is favored if the free energy of the system decreases upon assembly of soluble  
276 subunits into the lattice. Hence, the chemical potential of the polymerizing COPII coat,  $\mu_c$ ,  
277 includes the COPII binding chemical potential,  $\mu_c^0$ , and the term associated with the bending



278 energy of the underlying membrane (see Materials and Methods and (Saleem *et al.*, 2015)).  
279 Energetically favorable lattice polymerization is assisted by the relatively large binding  
280 energies between COPII subunits, which in turn penalize the existence of free binding sites  
281 within the COPII lattice. In particular, the peripheral subunits laying at the edge of the lattice  
282 have a number of unsatisfied bonds, which implies that the free energy of the system could be  
283 further relaxed by fulfilling those bonds and hence reducing the length of the COPII patch edge.  
284 This is formalized in physical terms by considering a line energy of the COPII lattice, which is  
285 proportional to its boundary length,  $l = 2\pi\rho$ , and the proportionality factor is the line tension  
286 of the free, peripheral COPII subunits,  $\lambda_0$ . Altogether, these contributions give the part of the  
287 free energy per unit area that is independent of TANGO1,  $f_c^0$ , which can be written as

$$289 \quad f_c^0 = \frac{1}{A_p} \left[ \sigma A_m - \left( \mu_c^0 - 2 \frac{\kappa_b}{R^2} \right) A_c + 2\pi\lambda_0 \rho \right], \quad (1)$$

290  
291 where  $A_m$  is the membrane surface area,  $A_c$  is the surface area of the membrane covered by the  
292 COPII coat,  $A_p$  is the surface area of the carrier projection onto the flat membrane, and  $\rho$  is the  
293 radius of the base of the carrier (see **Figure 1–figure supplement 1** and Materials and methods  
294 section).

295  
296 To quantitatively analyze the effect of TANGO1 ring formation and COPII capping on  
297 transport intermediate formation, we use a continuum model, which implicitly considers  
298 TANGO1 family proteins (TANGO1, cTAGE5 and TANGO1-Short) and TANGO1-binding  
299 COPII subunits. Here, the “microscopic” interaction energies are averaged out into  
300 “macroscopic” free energies, such as the filament bending energy, or the coat line energy. In  
301 addition, molecular length scales are represented by effective quantities, such as the  
302 spontaneous curvature of the rings or the imposed coat radius of curvature. Although simplistic  
303 in nature, this continuum model is a suitable choice for a semi-quantitative description of the  
304 main physical mechanisms driving ring formation, as structural data on TANGO1 proteins are  
305 currently lacking. Hence, we need to consider two different protein interactions: (i) TANGO1-  
306 TANGO1 interactions, which control the bending energy of the TANGO1 filament; and (ii)  
307 TANGO1 interaction with peripheral COPII subunits, which controls the line energy of the  
308 COPII domain. To build our physical model of TANGO1 ring formation, we need a  
309 mathematical formulation of these interactions in terms of physical energies.

310  
311 *Bending energy of the TANGO1 filament.*

312 We hypothesized that TANGO1 family proteins have the ability to form linear filaments by  
313 protein-protein interactions (**Figure 1C**). Filament deformations generate elastic stresses that  
314 arise as a result of filament bending away from its preferred shape. We can use the elastic theory  
315 of rods (Landau and Lifshitz, 1986) to describe the bending energy of a TANGO1 filament per  
316 unit length as  $\frac{\kappa_T}{2} (c - c_0)^2$ , where  $\kappa_T$  is an elastic parameter that characterizes the bending  
317 rigidity of the TANGO1 filament,  $c = 1/\rho$  and  $c_0$  are the local and preferred curvatures of the  
318 filament, respectively, and  $\rho$  is the local radius of curvature of the filament (**Figure 1C**). If we  
319 define the capping fraction,  $\omega$ , as the fraction of COPII lattice boundary length associated with  
320 TANGO1 molecules, we can write down the free energy of TANGO1 filament bending per unit  
321 area as

$$323 \quad f_{T,bend} = \frac{1}{A_p} \frac{\kappa_T}{2} \omega (1/\rho - c_0)^2 2\pi\rho, \quad (2)$$

324

325 where  $\rho$  corresponds to the in-plane projected radius of the COPII patch encircled by the  
326 TANGO1 ring, and hence also to the radius of curvature of the TANGO1 filament forming the  
327 ring (see Materials and Methods).

328

329 *Linactant effect of TANGO1 capping the COPII lattice.*

330 We hypothesize that TANGO1 has the ability to cap growing COPII buds by binding to their  
331 peripheral subunits. Such TANGO1-COPII binding leads to an effective reduction of the line  
332 energy of the bud (see Materials and Methods). The binding affinity of TANGO1 to COPII is  
333  $\Delta\lambda$ , which can be understood as the linactant strength of TANGO1 capping peripheral COPII  
334 subunits. Altogether, we can express the interaction free energy per unit area between TANGO1  
335 and the COPII lattice,  $f_{TANGO1-COPII}$ , as

336

$$337 \quad f_{TANGO1-COPII} = -\frac{1}{A_p} \Delta\lambda 2\pi\rho\omega. \quad (3)$$

338

339 *Overall free energy of the system.*

340 Finally, we also account for the mechanical work of an outward-directed force,  $N$ , which favors  
341 transport intermediate elongation (see Materials and Methods). Altogether, we can write the  
342 total free energy per unit surface area,  $f_c$ , as  $f_c = f_c^0 + f_{T,bend} + f_{TANGO1-COPII} - \frac{Nh}{A_p}$ , where

343  $h$  is the height of the carrier (**Figure 1-figure supplement 1B**). In order to relate the free energy  
344 of the system with respect to a reference state, we choose to use the uncoated, flat membrane  
345 as the reference state. This state is characterized by the absence of a coat, that is  $A_c = 0$ ,  $\lambda_0 =$   
346  $0$ , and  $\omega = 0$ ; the absence of an applied force,  $N = 0$ ; and given that the membrane is flat, we  
347 have that  $A_m = A_p$ , and  $h = 0$ . Hence, we can write,  $f_c^{ref} = \sigma$ , and define the free energy  
348 change of the system,  $\Delta f_c = f_c - f_c^{ref}$ , as

349

$$350 \quad \Delta f_c = \sigma \left( \frac{A_m}{A_p} - 1 \right) - \left( \mu_c^0 - 2 \frac{\kappa_b}{R^2} \right) \frac{A_c}{A_p} + \left[ \lambda_0 - \omega \Delta\lambda + \omega \frac{\kappa_T}{2} \left( \frac{1}{\rho} - c_0 \right)^2 \right] \frac{2\pi\rho}{A_p} - \frac{Nh}{A_p}. \quad (4)$$

351

352

353

## 354 PARAMETER ESTIMATION

355 The free energy per unit area, **Equation (4)** depends on a number of structural, biochemical,  
356 and mechanical parameters, which we can split in three groups: (i) membrane-associated  
357 parameters, (ii) coat-associated parameters, and (iii) TANGO1-associated parameters (**Table**  
358 **I**). As for the membrane-associated parameters, we have the lateral tension,  $\sigma$ , and the bending  
359 rigidity,  $\kappa_b$ . Regarding membrane-associated parameters, we use the experimentally measured  
360 values of the standard membrane tension of the ER,  $\sigma_{ER} = 0.003 k_B T/nm^2$  (Upadhyaya and  
361 Sheetz, 2004); and of the membrane bending rigidity,  $\kappa_b = 20 k_B T$  (Niggemann, Kummrow  
362 and Helfrich, 1995) (**Table I**). Regarding coat-associated parameters, we use the size of the  
363 standard spherical COPII vesicle,  $R = 37.5 nm$  (Miller and Schekman, 2013). The line tension  
364 and the binding free energy of the polymerizing COPII coat,  $\lambda_0$  and  $\mu_c^0$ , respectively, have not  
365 been, to the best of our knowledge, experimentally measured. Nevertheless, for clathrin coats,  
366 which lead to the formation of vesicles of a size comparable to the standard COPII vesicles,  
367 these values have been recently measured, yielding a value of  $\lambda_{clathrin} = 0.05 pN$  for the line  
368 tension and of  $\mu_{clathrin}^0 = 0.024 \pm 0.012 k_B T/nm^2$  for the binding free energy (Saleem *et*

369 *al.*, 2015). We use these values as starting estimations for COPII coats, which we will then vary  
370 within a certain range (**Table 1**). Finally, regarding the TANGO1-associated parameters, which  
371 are associated to different protein-protein interactions, we have the bending rigidity of the  
372 TANGO1 filament,  $\kappa_T$ ; the preferred curvature of the filament,  $c_0$ ; and the TANGO1-COPII  
373 binding energy/linactant strength of TANGO1,  $\Delta\lambda$ . The elastic parameters of the TANGO1  
374 filament,  $\kappa_T$  and  $c_0$ , depend on the chemistry of the bonds between the different proteins within  
375 a TANGO1 filament. As we lack experimental data on the value of these parameters, we  
376 consider them within a wide range of reasonable values. Typical values of the bending rigidity  
377 of intracellular filaments formed by protein-protein interactions, such as intermediate filaments,  
378 are of the order of  $\kappa_{IF} = 2000 \text{ pN} \cdot \text{nm}^2$  (Fletcher and Mullins, 2010), which we consider as  
379 an upper limit for the rigidity of a TANGO1 filament. In addition, by taking  $\kappa_T = 0$ , we can  
380 exploit our model to study the case where TANGO1 proteins do not form a cohesive filament  
381 by attractive lateral protein-protein interactions, but individual proteins can still bind COPII  
382 subunits and hence act as monomeric linactants. For our analytical analysis we will start by  
383 taking a zero spontaneous curvature of the TANGO1 filament,  $c_0 = 0$ , and later study it within  
384 a range given by twice the radius of experimentally measured TANGO1 rings,  $-0.02 \text{ nm}^{-1} <$   
385  $c_0 < 0.02 \text{ nm}^{-1}$ . For the value of  $\Delta\lambda$ , we can make an upper limit estimate, by considering that  
386 the TANGO1-COPII binding energy should be lower than the corresponding binding energy  
387 between polymerizing COPII components, that is,  $\Delta\lambda l_1 < \mu_c^0 l_1 l_2$ , where  $l_1 \approx 16 \text{ nm}$  and  
388  $l_2 \approx 10 \text{ nm}$  are the lateral dimensions of the inner COPII coat components Sec23/24  
389 (Matsuoka *et al.*, 2001). Hence, our estimation gives that  $\Delta\lambda < 0.24 k_B T / \text{nm}$ , and therefore  
390 we use as the initial value for our analysis half of the upper limit value,  $\Delta\lambda = 0.12 k_B T / \text{nm}$ ,  
391 which is ten-fold larger than the bare line tension of the coat (**Table 1**).

## 392 RESULTS

393

### 394 ENERGETICALLY ACCESSIBLE EQUILIBRIUM CONFIGURATIONS

395 We consider that the carrier adopts the equilibrium configuration, corresponding to the  
 396 configuration of minimum free energy, **Equation (4)**. Although the system is not in equilibrium,  
 397 this assumption will be valid as long as the mechanical equilibration of the membrane shape is  
 398 faster than the fluxes of the lipids and proteins involved in the problem (Sens and Rao, 2013;  
 399 Campelo *et al.*, 2017). Hence, assuming local equilibrium, our aim is to compute the shape of  
 400 the carrier and the state of TANGO1 capping that minimize **Equation (4)** under a wide range  
 401 of possible values of the elastic parameters of the system (see Materials and methods). To  
 402 further extend the scope of our equilibrium analytical model, in **Appendix 1** we discuss and  
 403 analyze a fully dynamic, computational model of transport intermediate formation.

404

405 In order to compute the optimal membrane shape and TANGO1 capping state, we will seek for  
 406 the minimum of the total free energy per unit area, **Equation (4)**, as a function of the two  
 407 degrees of freedom of the model: the capping fraction,  $\omega$ , and the transport intermediate shape.  
 408 For the latter, we use a dimensionless parameter to characterize the elongation state of the  
 409 transport intermediate:  $\eta = h/2R$ , which is the height of the carrier divided by the diameter of  
 410 a fully formed bud (**Figure 1–figure supplement 1B**). Taking this into account, we can write  
 411 down the free energy per unit area, **Equation (4)**, as (see Materials and methods):

412

$$413 \quad \Delta f_c = \begin{cases} \frac{\sigma\eta - \tilde{\mu}}{1-\eta} + \frac{\tilde{\lambda}(\omega)}{\sqrt{\eta(1-\eta)}} + \frac{\omega\tilde{\kappa}_T}{\eta(1-\eta)} \left( \frac{1}{\sqrt{\eta(1-\eta)}} - 4c_0R \right), & \eta \leq 1/2 \\ 4\sigma[n + (\eta - n)^2] - 4\tilde{\mu}\eta + 4\tilde{\lambda}(\omega)\sqrt{(\eta - n)(1 - \eta + n)} \\ \quad + 4\omega\tilde{\kappa}_T \left( \frac{1}{\sqrt{(\eta - n)(1 - \eta + n)}} - 4c_0R \right), & \eta \geq 1/2 \end{cases} \quad (5)$$

414

415 where  $\tilde{\mu} = \mu_c^0 - 2\frac{\kappa_b}{R^2} + \frac{N}{2\pi R}$  is the effective chemical potential, which depends on the binding  
 416 energy of the coat to the membrane,  $\mu_c^0$ , the bending rigidity of the membrane,  $\kappa_b$ , and the  
 417 applied pulling/pushing force,  $N$ ;  $\tilde{\lambda}(\omega) = (\lambda_0 - \omega \Delta\lambda)/R + 4\omega\tilde{\kappa}_T(c_0R)^2$ , is the effective line  
 418 tension of the coat;  $\tilde{\kappa}_T = \kappa_T/8R^3$  is the renormalized bending rigidity of the TANGO1  
 419 filament; and  $n$  is the number of fully-formed buds (see Materials and Methods). From the  
 420 expression for the effective chemical potential,  $\tilde{\mu}$ , we can see that applying a force in the bud  
 421 growth direction,  $N$ , plays the same role as increasing the coat binding free energy,  $\mu_c^0$ , and  
 422 therefore helps counterbalance the elastic resistance of the membrane to deformation.

423

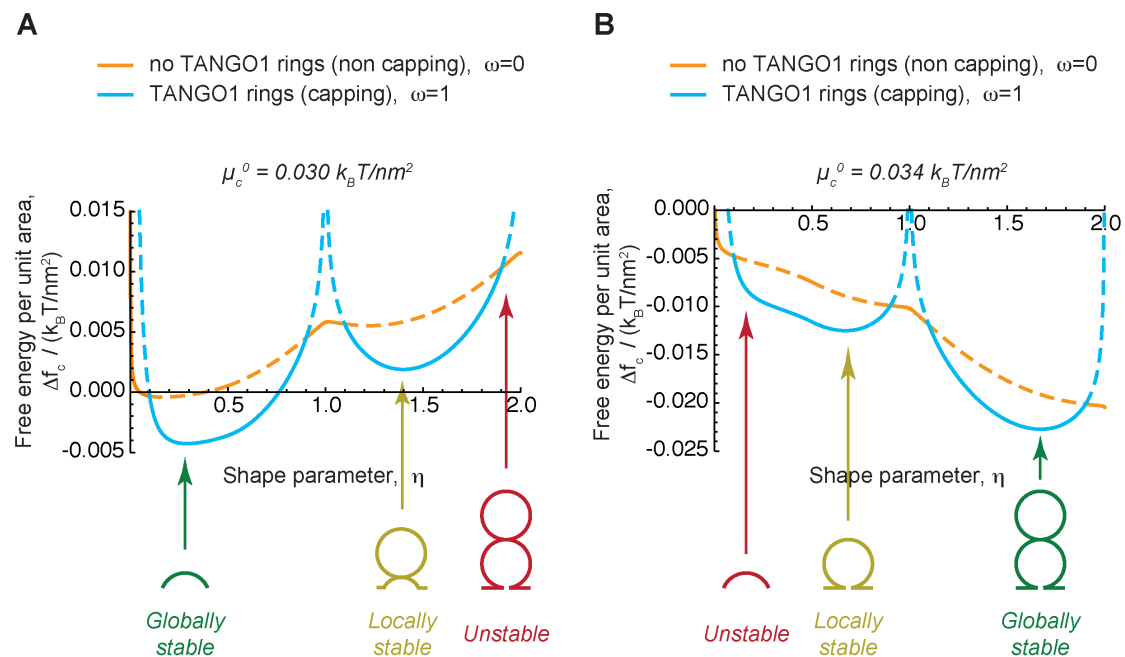

**Figure 2. Free energy profile of a transport intermediate as a function of its shape and TANGO1 capping.**

(A,B) The free energy per unit area of the transport intermediate-TANGO1 system,  $\Delta f_c$ , plotted as a function of the shape parameter,  $\eta$ , for the COPII coat binding energy,  $\mu_c^0 = 0.030 k_B T/nm^2$  (A), or  $\mu_c^0 = 0.034 k_B T/nm^2$  (B). Two curves, corresponding to full COPII capping by TANGO1 ( $\omega = 1$ , light blue curves) and full uncapping ( $\omega = 0$ , orange curves), are shown in each panel. For each value of the shape parameter,  $\eta$ , the locally stable state of TANGO1 capping/unapping (lower free energy) is represented by the corresponding solid curve, whereas dashed curves indicate unstable states (higher free energy). A schematic representation of the shape of the transport intermediate for different values of the shape parameter,  $\eta$ , is depicted, including globally stable shapes (in green), locally stable (metastable) shapes (in dark yellow), as well as examples of unstable shapes (in red). We considered no applied force,  $N = 0$ , and the rest of the elastic parameters used for the calculations are specified in **Table 1**.

The free energy per unit area of the transport intermediate,  $\Delta f_c$ , has a non-trivial dependence on the shape of the carrier, parametrized by the shape parameter,  $\eta$ , as given by **Equation (5)**. This implies that multiple locally stable shapes, corresponding to different local minima of the free energy, can coexist. To illustrate this dependence, the profiles of the free energy per unit area,  $\Delta f_c$ , as a function of the shape parameter  $\eta$ , for both complete capping (TANGO1 rings forming around COPII patches),  $\omega = 1$ , and no capping (no TANGO1 rings around COPII patches),  $\omega = 0$ , are shown in **Figure 2** for two different scenarios (see also **Figure 2-figure supplement 1** for the detailed plot of the different contributions to the free energy of the system). In the first one, which corresponds to a situation where the COPII binding energy is relatively small,  $\mu_c^0 = 0.03 k_B T/nm^2$  (**Figure 2A**), the global minimum of the free energy corresponds to a shallow bud surrounded by a TANGO1 ring (depicted in green in **Figure 2A**). Other locally stable shapes, corresponding to a shallow bud connected to a set of spheres, can be found (depicted in yellow in **Figure 2A**). By contrast, in the second scenario illustrated in **Figure 2B**, which corresponds to a situation of a relatively large COPII binding energy,  $\mu_c^0 = 0.034 k_B T/nm^2$ , the transport intermediate will grow from an initially unstable shallow bud (depicted in red in **Figure 2B**) to a locally stable, almost fully formed spherical carrier (depicted in yellow in **Figure 2B**). Then, overcoming an energy barrier will result in further growth of the carrier into a large transport intermediate (depicted in green in **Figure 2B**).

## 457 CAPPING-UNCAPPING TRANSITION OF TANGO1

458 Under which conditions do TANGO1 rings form by capping the edge of COPII patches? The  
 459 free energy in **Equation (4)** has a linear dependence on the capping fraction,  $\omega$ , and therefore  
 460 is a monotonic function with respect to this variable. This implies that energy minimization will  
 461 drive the system to either complete TANGO1 filament capping the edge of the COPII patch  
 462 ( $\omega = 1$ ), or complete absence of TANGO1 around COPII ( $\omega = 0$ ), depending on the sign of  
 463  $\partial\Delta f_c/\partial\omega$ . Partial rings, as experimentally observed (Raote *et al.*, 2018), might represent free  
 464 TANGO1 filaments, rings in the process of assembly or disassembly, or complete rings  
 465 complemented by other TANGO1-family proteins. The capping-uncapping transition  
 466 corresponds, for a given value of the COPII boundary radius,  $\rho$ , to a stationary point of the free  
 467 energy, **Equation (4)**, with respect to the capping fraction,  $\partial\Delta f_c/\partial\omega = 0$ . This condition sets a  
 468 critical value of the COPII boundary radius,  $\rho^*$ , which defines the capping-uncapping  
 469 transition,

$$471 \quad \rho^* = \frac{\xi}{1+c_0\xi}, \quad (6)$$

472  
 473 for  $c_0 > -\frac{1}{\xi}$ , where  $\xi = \sqrt{\frac{\kappa_T}{2\Delta\lambda}}$  is a TANGO1-related length-scale, which, for the standard  
 474 parameters described in **Table 1** is  $\xi \approx 22 \text{ nm}$ . For  $\rho > \rho^*$ , there is complete capping of COPII  
 475 domains by TANGO1 and thus full formation of TANGO1 rings; whereas for  $\rho < \rho^*$ , there is  
 476 complete absence of TANGO1 filaments around COPII domains and no TANGO1 rings are  
 477 formed there (**Figure 3A**). Next, if we consider the case where the bud opening radius  $\rho$  is  
 478 equal to the radius of curvature imposed by the spherical polymerization of COPII,  $R$ , we can  
 479 define a critical value of the TANGO1 linactant strength below which there is no formation of  
 480 COPII-capping TANGO1 rings,  $\Delta\lambda^{trans} = \frac{\kappa_T}{2} \left(\frac{1}{R} - c_0\right)^2$  (**Figure 3A**).

481  
 482 However, whether a TANGO1 ring forms around a growing COPII patch depends not only on  
 483 the TANGO1 properties (bending rigidity and linactant strength), but also on the actual shape  
 484 of the COPII coat boundary (neck radius  $\rho$ ) and therefore on the capacity of the coat to bend  
 485 membranes, according to **Equation 5**. Inspecting the free energy profiles shown in **Figure 2**  
 486 we observe that during a quasi-static growth of the transport intermediate from  $\eta = 0$  to the  
 487 shape that corresponds to the global minimum of the system free energy (green shapes in **Figure**  
 488 **2**), the system goes through a series of capping-uncapping transitions at  $\eta = \eta^{tr}$ . These  
 489 transitions occur when  $\Delta f_c(\eta^{tr}, \omega = 0) = \Delta f_c(\eta^{tr}, \omega = 1)$ , which, from **Equation (5)**  
 490 correspond to  $\eta^{tr} = n + \frac{1}{2} \left(1 \pm \sqrt{1 - \frac{\kappa_T}{2\Delta\lambda R^2}}\right)$ , for  $c_0 = 0$  (**Figure 3B**). As expected, capping  
 491 of COPII components by TANGO1 is promoted by large values of the TANGO1-COPII  
 492 interaction,  $\Delta\lambda$ , and prevented by large TANGO1 filament bending rigidities,  $\kappa_T$  (**Figure 3B**).  
 493 The general case for an arbitrary filament preferred curvature,  $c_0$ , is analogous to the values of  
 494 the opening angle described by **Equation (6)**. From the free energy profile shown in **Figure**  
 495 **2B**, we can also notice that the system needs to overcome an energy barrier to reach the globally  
 496 stable state, so the system can be kinetically trapped into a locally stable deep bud (yellow shape  
 497 in **Figure 2B**). How such transitions occur is beyond the scope of this simple analytical model,  
 498 since shape transition could proceed through transient uncapping of the TANGO1 filament or  
 499 through intermediate shapes between a cylindrical tube and a set of spherical vesicles joined by  
 500 a narrow connection, such as unduloids (see Materials and Methods). A more elaborate

501 computational analysis of such intermediate shapes is presented in **Appendix I**. Taken together,  
 502 our analysis shows that the growth of a transport intermediate can be modulated by the  
 503 formation of TANGO1 rings capping COPII components, and a series of capping-uncapping  
 504 transition should occur during the growth of a transport intermediate.  
 505  
 506

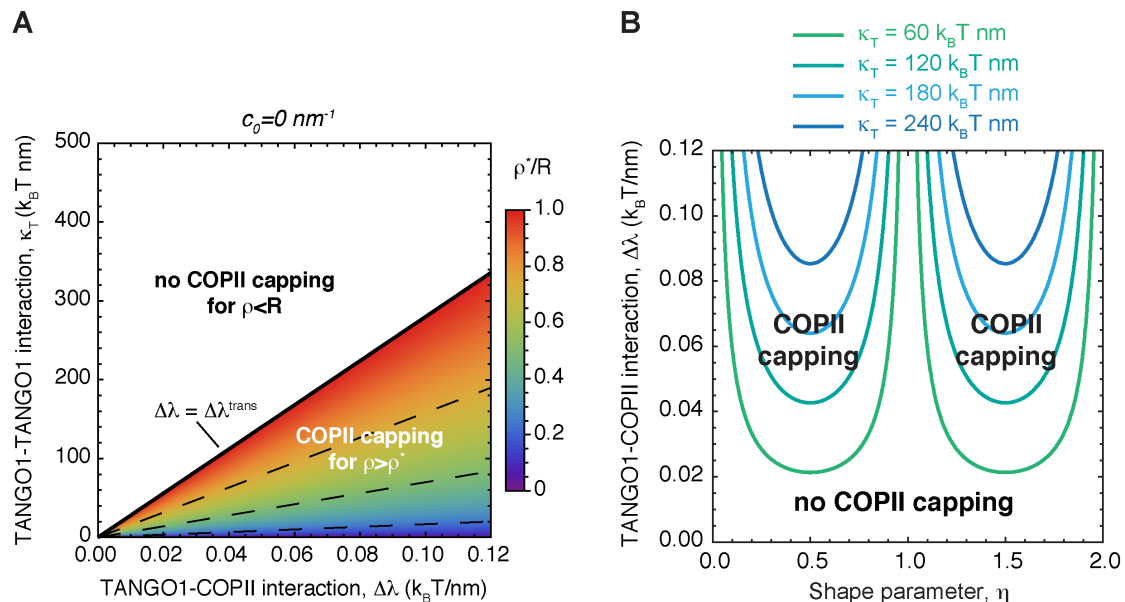

507  
 508 **Figure 3. A capping-uncapping transition controls the formation of TANGO1 rings around COPII**  
 509 **coats.**  
 510 **(A)** The capping-uncapping phase diagram as a function of the TANGO1 ring size,  $\rho$  (color-coded), given  
 511 by **Equation (6)**, is plotted against two TANGO1 filament parameters: the linactant strength of the  
 512 TANGO1 filament,  $\Delta\lambda$ , associated with the TANGO1-COPII interaction, and the filament bending rigidity,  
 513  $\kappa_T$ , associated with the TANGO1-TANGO1 interaction, for a filament of zero spontaneous curvature. The  
 514 critical value of TANGO1 linactant strength,  $\Delta\lambda^{trans}$ , below which no functional TANGO1 rings form (no  
 515 COPII capping) is marked by the thick black line. **(B)** Capping-uncapping transitions of TANGO1 as a  
 516 function of the shape of the transport carrier,  $\eta$ , plotted against the TANGO1 linactant strength,  $\Delta\lambda$ , for  
 517 different values of the filament bending rigidity,  $\kappa_T$ .

518  
 519

## 520 FUNCTIONAL TANGO1 RINGS MODULATE TRANSPORT INTERMEDIATE 521 FORMATION

522 To understand how TANGO1 rings modulate the formation of transport intermediates, we next  
 523 sought locally and globally stable transport intermediate shapes. To this end, we computed the  
 524 local minima of the overall energy of the system per unit area, **Equation (5)**, for both single  
 525 buds (shape parameter  $\eta < 1$ ) or for large transport intermediates (shape parameter  $\eta > 1$ ). In  
 526 **Figure 4**, we show the optimal shape of the intermediate –as measured by the optimal shape  
 527 parameter,  $\eta^*$ – for a wide range of the model’s parameters. We first studied how transport  
 528 intermediate formation depends on two key parameters: the COPII binding energy,  $\mu_c^0$ , and  
 529 the tension of the membrane,  $\sigma$  (**Figure 4A**). Our results show that both (i) increasing the ability  
 530 of COPII to bind, and hence bend, membranes and (ii) decreasing the membrane tension favor  
 531 the formation of large transport intermediates. Interestingly, for the range of COPII binding  
 532 energies,  $0.0285 k_B T/nm^2 < \mu_c^0 < 0.0315 k_B T/nm^2$ , we notice that decreasing the tension of  
 533 the ERES can lead to the elongation and of the transport intermediate from a shallow bud  
 534 towards a pearled structure (**Figure 4A**, right panel), hence opening the possibility that

535 membrane tension regulation at the procollagen export sites can induce the elongation of a  
 536 transport intermediate. Interestingly, these results are in a good qualitative agreement with our  
 537 dynamic model of transport carrier formation (see *Appendix I*). Next, we studied the role of a  
 538 point-like force applied in the direction of bud growth. Our results show that the existence of  
 539 such a force facilitates the transition from a shallow bud to a large intermediate (*Figure 4B,C*).  
 540  
 541

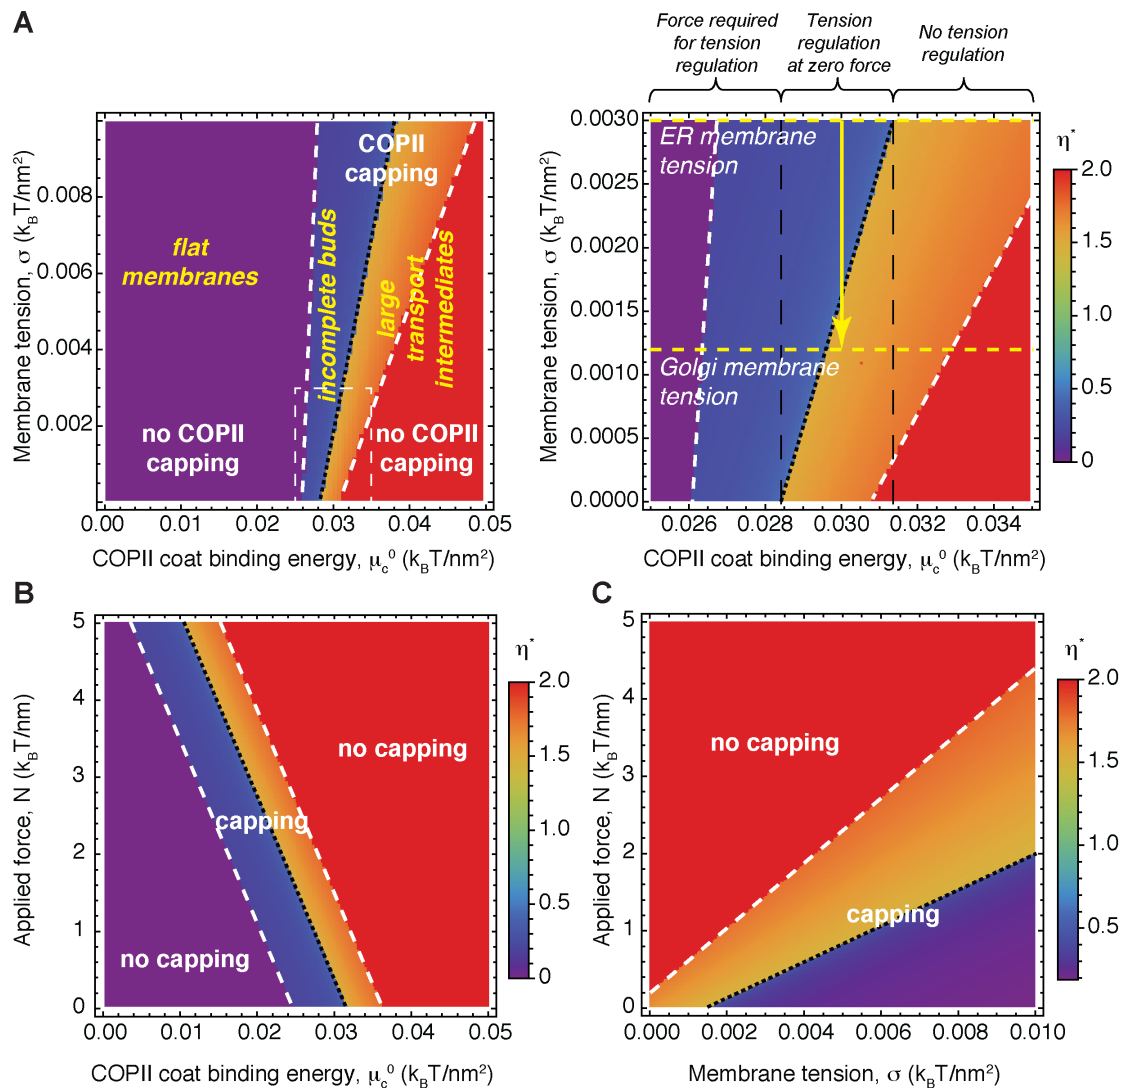

542  
 543 **Figure 4. Shape diagram of the transport intermediate as a function of the membrane and COPII-**  
 544 **controlled elastic parameters.**

545 **(A–C)** Two-dimensional shape diagrams indicating the shape of minimal elastic energy, represented by the  
 546 optimal shape parameter,  $\eta^*$  (color-coded), and the state of TANGO1 capping (capping/uncapping  
 547 transitions marked by thick, dashed, white lines). **(A)** Shape diagram plotted as a function of the COPII  
 548 coat binding energy,  $\mu_c^0$ , and of the membrane tension,  $\sigma$ , for vanishing applied force ( $N = 0$ ). A zoom of  
 549 the thin, dashed, white box on the left panel is shown in the right panel for clarity. Different shape  
 550 transitions can be identified, from flat membranes,  $\eta^* = 0$ , to incomplete buds,  $\eta^* < 1/2$ , to large transport  
 551 intermediates,  $\eta^* > 1$ , for both COPII capping ( $\omega = 1$ ) or not ( $\omega = 0$ ) by TANGO1. On the right panel, we  
 552 mark the measured values for the standard ER and Golgi membrane tensions, and marked the regions of  
 553 the shape diagram where tension regulation can or cannot describe the elongation of a shallow bud into  
 554 a large transport intermediate (see text for details). **(B,C)** Shape diagram plotted as a function of the  
 555 applied force,  $N$ , and the COPII coat binding energy,  $\mu_c^0$ , for  $\sigma = \sigma_{ER} = 0.003 k_B T/nm^2$  **(B)**; or the  
 556 membrane tension,  $\sigma$ , for  $\mu_c^0 = 0.03 k_B T/nm^2$  **(C)**. Unless otherwise specified, the elastic parameters used  
 557 for all the calculations shown in **(A–C)** are listed in *Table 1*.



558 Next, we computed how the properties of the TANGO1 filament, namely, the bending rigidity,  
 559  $\kappa_T$ , and preferred curvature,  $c_0$ , of the filament (given by the TANGO1-TANGO1 interactions),  
 560 as well as the linactant strength (given by the TANGO1-COPII interactions),  $\Delta\lambda$ , affect the  
 561 formation of transport intermediates. Our results indicate that neither the linactant strength of  
 562 the filament (**Figure 5A**) nor the rigidity (**Figure 5B**) or preferred curvature (**Figure 5-figure**  
 563 **supplement 1**) of the TANGO1 filament alter the transition zone between shallow buds ( $\eta <$   
 564  $1/2$ ) and large intermediates ( $\eta > 1$ ). However, filament properties are fundamental in  
 565 controlling the capping/uncapping transition. Hence, in conditions of TANGO1 capping COPII  
 566 components (such as large linactant strength or small filament bending rigidity), open shapes  
 567 are favored as compared to flat or fully budded shapes (**Figure 5A,B** and **Figure 5-figure**  
 568 **supplement 1**), suggesting once more that TANGO1 filaments can act as a means to prevent  
 569 premature carrier fission before procollagen gets fully packaged into the nascent intermediate.  
 570  
 571 Interestingly, based on **Equation (5)**, we can have a good analytical estimate of the transition  
 572 between incomplete shallow buds and large transport intermediates by considering the situation  
 573 where the free energy of an incomplete bud with a certain shape (given by the height parameter  
 574  $\eta$ ) equals to the free energy of a large intermediate with an extra pearl (given by the height  
 575 parameter  $\eta + 1$ ):

$$\mu_c^0 - 2\frac{\kappa_b}{R^2} + \frac{N}{2\pi R} - \sigma = 0, \quad (7)$$

576  
 577  
 578 which is independent to the structural details of the TANGO1 filaments, and is shown in **Figure**  
 579 **5C**. This expression allows us to define a critical force  $N^* = 2\pi R \left( \sigma - \mu_c^0 + 2\frac{\kappa_b}{R^2} \right)$ ; a critical  
 580 coat binding energy,  $\mu_c^{0*} = \sigma + 2\frac{\kappa_b}{R^2} - \frac{N}{2\pi R}$ ; and a critical membrane tension,  $\sigma^* = \mu_c^0 -$   
 581  $2\frac{\kappa_b}{R^2} + \frac{N}{2\pi R}$ ; such that for  $N > N^*$ ,  $\mu_c^0 > \mu_c^{0*}$ , or  $\sigma < \sigma^*$ , the transition to large transport  
 582 intermediates is triggered. Taking the known or estimated parameters for the standard  
 583 membrane tension of the ER,  $\sigma_{ER} = 0.003 k_B T/nm^2$  (Upadhyaya and Sheetz, 2004); for the  
 584 membrane bending rigidity,  $\kappa_b = 20 k_B T$  (Niggemann, Kummrow and Helfrich, 1995); and  
 585 for the size of the standard spherical COPII vesicle,  $R = 37.5 nm$  (Miller and Schekman,  
 586 2013) (see **Table 1**); we get  $N^* = \left( 7.4 - \mu_c^0 / 0.0042 k_B T/nm^2 \right) k_B T/nm$  at  $\sigma = \sigma_{ER}$ ;  
 587  $\mu_c^{0*} = 0.031 k_B T/nm^2$  at  $\sigma = \sigma_{ER}$  and zero applied force ( $N = 0$ ); and  $\sigma^* = \mu_c^0 -$   
 588  $0.028 k_B T/nm^2$ , at zero force. Taken together, our results indicate that the formation of large  
 589 transport intermediates can be favored by (i) an increase in the COPII coat binding energy,  $\mu_c^0$ ;  
 590 (ii) a force,  $N$ , applied towards the direction of carrier growth; and/or a local decrease in the  
 591 membrane tension,  $\sigma$ .  
 592

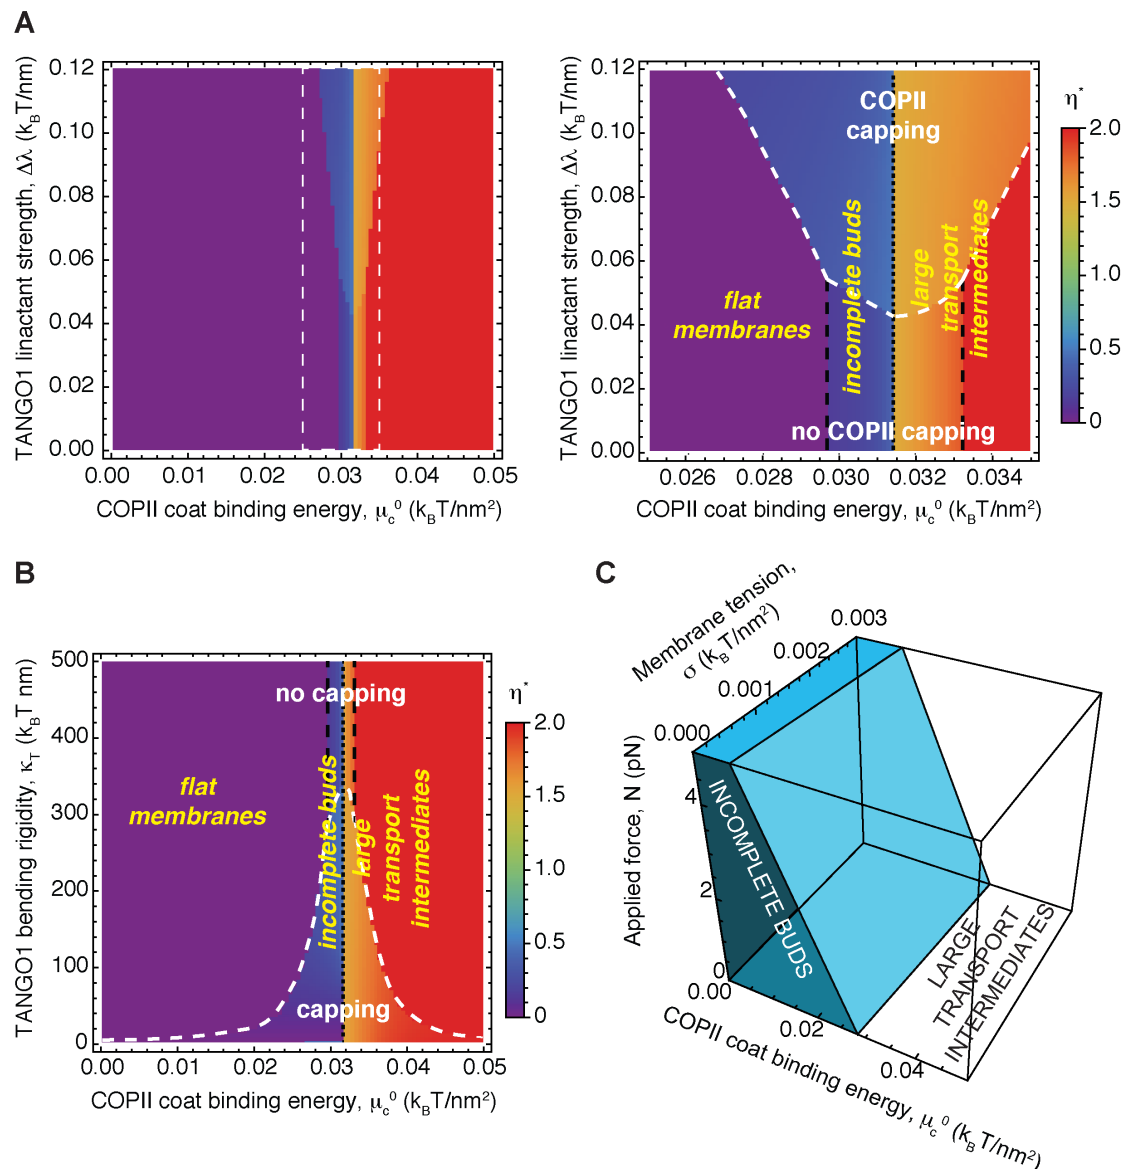

593  
594  
595  
596  
597  
598  
599  
600  
601  
602  
603  
604  
605  
606  
607  
608  
609  
610  
611  
612

**Figure 5. Shape diagram of the transport intermediate as a function of the TANGO1-regulated elastic parameters.**

(A,B) Two-dimensional shape diagrams indicating the shape of minimal elastic energy, represented by the optimal shape parameter,  $\eta^*$  (color-coded), and the state of TANGO1 capping (capping/uncapping transitions marked by thick, dashed, white lines). (A) Shape diagram plotted as a function of the COPII coat binding energy,  $\mu_c^0$ , and of the TANGO1 inactant strength,  $\Delta\lambda$ , for vanishing applied force ( $N = 0$ ). A zoom of the thin, dashed, white box on the left panel is shown in the right panel for clarity, where the different shape transitions can be identified, from flat membranes,  $\eta^* = 0$ , to incomplete buds,  $\eta^* < 1/2$ , to large transport intermediates,  $\eta^* > 1$ , for both COPII capping ( $\omega = 1$ ) or not ( $\omega = 0$ ) by TANGO1. (B) Shape diagram plotted as a function of the COPII coat binding energy,  $\mu_c^0$ , and of the TANGO1 filament bending rigidity,  $\kappa_T$ , for vanishing applied force ( $N = 0$ ). (C) Three-dimensional shape diagram, indicating the transition zone between incomplete buds (including both flat membranes,  $\eta^* = 0$ , and shallow buds,  $\eta^* < 1/2$ ) and large transport intermediates ( $\eta^* > 1$ ), as given by Equation (7), as a function of the COPII coat binding energy,  $\mu_c^0$ ; the membrane tension,  $\sigma$ ; and the applied force,  $N$ . Unless otherwise specified, the elastic parameters used for all the calculations shown in (A-C) are listed in Table 1.

## 613 MEMBRANE TENSION REGULATION BY TANGO1 CAN MEDIATE 614 PROCOLLAGEN EXPORT

615 At present, we have no direct experimental evidence for the existence of a directed force pulling  
616 on growing buds at ERES, nor in the change of the COPII binding energy to assist in the  
617 formation of large transport intermediates. However, as mentioned earlier, TANGO1 rings  
618 serve to recruit COPI-coated membranes from the ERGIC (either vesicles or the ERGIC itself)  
619 to procollagen enriched export sites, which, upon fusion, could locally and transiently decrease  
620 the tension of the ERES. For this reason, we analyze here in more detail the requirements for  
621 the formation of large transport intermediates as a result of local reduction of the membrane  
622 tension from an initial value,  $\sigma_0$ , to a lower value,  $\sigma = \sigma_0 - \Delta\sigma$ . Hence, **Equation (7)** can be  
623 written as  $\frac{\Delta\sigma^*}{\sigma_0} = 1 - \frac{\mu_c^0}{\sigma_0} + 2 \frac{\kappa_b}{\sigma_0 R^2} - \frac{N}{2\pi\sigma_0 R}$ . In **Figure 6-figure supplement 1A,B**, we show the  
624 relative membrane tension reduction required to lead to the extrusion of long transport  
625 intermediates,  $\frac{\Delta\sigma^*}{\sigma_0}$ , as a function of the COPII coat binding energy,  $\mu_c^0$ , in the absence or  
626 presence of an applied force. The critical relative surface tension reduction defines three distinct  
627 regions in the  $\left\{ \mu_c^0, \frac{\Delta\sigma}{\sigma_0} \right\}$  parameter space (**Figure 4A**, and **Figure 6-figure supplement 1A**). At  
628 zero applied force, the first one corresponds to low values of COPII coat binding energy,  $\mu_c^0 <$   
629  $0.0284 k_B T / nm^2$ , where COPII polymerization energy is not large enough to allow growth of  
630 large transport intermediates, even in the absence of any lateral membrane tension (**Figure 4A**,  
631 left region in the right panel diagram, and **Figure 6-figure supplement 1A**). Within the second  
632 region, which corresponds to intermediate values of the coat binding energy,  $0.0284 k_B T /$   
633  $nm^2 < \mu_c^0 < 0.0314 k_B T / nm^2$ , a partial reduction in membrane lateral tension can trigger  
634 formation of large transport intermediates in the absence of any applied force (**Figure 4A**,  
635 middle region in the diagram, and **Figure 6-figure supplement 1A**). We refer to this  
636 intermediate region of the shape diagram as the region of transport intermediate formation  
637 triggered by TANGO1-mediated membrane tension regulation. Our calculations show that the  
638 relative decrease in membrane tension required to form large intermediates depends on the  
639 actual value of COPII coat binding energy (**Figure 6-figure supplement 1A**). We first consider  
640 the situation where tension in the ERES decreases from experimentally measured value of the  
641 ER membrane,  $\sigma_{ER} = 0.003 k_B T / nm^2$ , to experimentally measured value of Golgi  
642 membranes,  $\sigma_{GC} = 0.0012 k_B T / nm^2$  (Upadhyaya and Sheetz, 2004), which accounts for a  
643 relative reduction in membrane tension of 60%. Such a reduction in tension can drive elongation  
644 of a bud to a large intermediate for values of the coat binding energy,  $\mu_c^0 > 0.0296 k_B T / nm^2$   
645 (**Figure 6-figure supplement 1A**, red arrow). However, for more modest reductions in  
646 membrane tension, our results indicate that generation of large transport intermediates can also  
647 be triggered in the absence of a pulling force (**Figure 4A**, and **Figure 6-figure supplement 1A**).  
648 Finally, in the third region of the shape diagram, which corresponds to large values of the coat  
649 binding energy,  $\mu_c^0 > 0.0314 k_B T / nm^2$ , the polymerization of long COPII-coated tubular  
650 intermediates can occur spontaneously without the need of membrane tension reduction  
651 (**Figure 4A**, right region in the diagram, and **Figure 6-figure supplement 1A**). Remarkably,  
652 the region where membrane tension regulation can trigger the formation of large transport  
653 intermediates, corresponds to values of COPII binding energy that are of the same order of  
654 magnitude as the values measured for clathrin ( $\mu_{clathrin}^0 = 0.024 \pm 0.012 k_B T / nm^2$ )  
655 (Saleem *et al.*, 2015). This suggests that our proposed mechanism of generating large  
656 intermediates by TANGO1-mediated membrane tension regulation is, at the very least, a  
657 physiologically feasible mechanism.

658

659 We next examined in more detail at the shape of the transport intermediate for these two  
 660 different membrane tensions ( $\sigma = \sigma_{ER}$  and  $\sigma = \sigma_{GC}$ ) as a function of the COPII coat binding  
 661 energy within the region of membrane tension regulation (**Figure 6-figure supplement 1C**). As  
 662 previously noted (**Figure 2**), multiple locally stable shapes exist, which are separated by free  
 663 energy barriers (**Figure 6-figure supplement 1D**). Our computations indicate that a reduction  
 664 in the membrane tension changes the free energy profile in such a way that globally stable  
 665 shallow buds (solid lines, **Figure 6-figure supplement 1C**) are converted into locally, but not  
 666 globally, stable shapes (dashed lines, **Figure 6-figure supplement 1C**). The free energy barrier  
 667 for the transition to the new globally stable large transport intermediate,  $\Delta f_{1,2}$ , (**Figure 6-figure**  
 668 **supplement 1D**) is decreased upon tension reduction (**Figure 6-figure supplement 1E**, black  
 669 arrow), hence helping in the elongation of the transport intermediate.

670

671

672

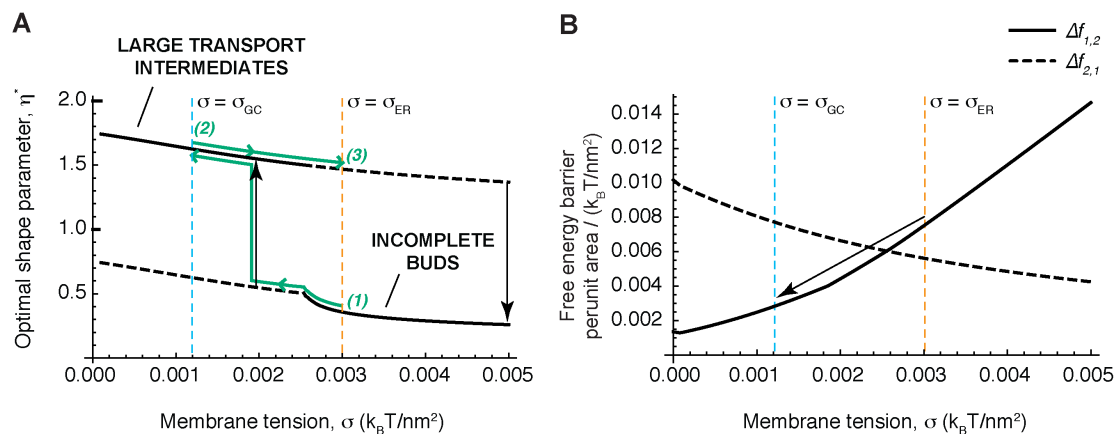

673

674

**Figure 6. Membrane tension regulation by TANGO1 can mediate procollagen export.**

675

676

677

678

679

680

681

682

683

684

685

686

687

688

689

690

691

692

693

694

695

696

697

Based on our previous experimental finding that functional TANGO1 rings recruit ERGIC53-containing membranes for procollagen export (Santos *et al.*, 2015; Raote *et al.*, 2018), we next aimed at understanding how membrane tension regulation can contribute in carrier elongation under physiological conditions. We computed the locally and globally stable shapes of the carrier, using our equilibrium model, for different tensions of the ER membrane for a defined value of the COPII coat binding energy within the tension regulation region (see **Figure 4A**). Our results indicate that, for a wide range of membrane tensions, both shallow buds and large

698 transport intermediates can be locally stable shapes (**Figure 6A**). For large values of the  
699 membrane tension, including the measured value for the ER membrane tension,  $\sigma_{ER} =$   
700  $0.003 k_B T/nm^2$ , bud growth is prevented and the globally stable shape corresponds to open,  
701 TANGO1-stabilized shallow buds (**Figure 6A**). For small values of the membrane tension,  
702 including the measured value of the Golgi membrane tension,  $\sigma_{GC} = 0.0012 k_B T/nm^2$ , a  
703 large, elongated carrier is energetically favorable as compared to the shallow bud (**Figure 6A**).  
704 Importantly, transitions between the two locally stable shapes (shallow buds and large transport  
705 intermediates) are separated by free energy barriers, which, if too large, kinetically prevent  
706 shape transitions (**Figure 6-figure supplement 1D**). We then calculated the value of both free  
707 energy barriers: the one for the transition from a shallow bud to a large transport intermediate,  
708  $\Delta f_{1,2}$ ; and the other one for the opposite transition from a large intermediate to a shallow bud,  
709  $\Delta f_{2,1}$  (**Figure 6B** and **Figure 6-figure supplement 1D**). Our results indicate that reduction of  
710 the membrane tension parallels the reduction of the free energy barrier for carrier growth, as  
711 expected (**Figure 6B**). To estimate whether the free energy barrier reduction leads to a  
712 kinetically feasible transition to large transport intermediates at low membrane tension, we  
713 computed the overall free energy barrier in the projected area,  $\Delta F_{1,2} = \Delta f_{1,2} A_p$ , where  $A_p =$   
714  $\pi R^2$ . For the conditions detailed in **Figure 6**, we have a total free energy barrier for carrier  
715 elongation of  $\Delta F_{1,2}(\sigma_{ER}) \approx 33 k_B T$  and  $\Delta F_{1,2}(\sigma_{GC}) \approx 8 k_B T$ . Assuming that the transition  
716 follows Arrhenius kinetics,  $\tau = t_0 e^{\Delta F_{1,2}/k_B T}$ , with a characteristic time scale  $t_0 \sim 1 ms$   
717 (Campelo *et al.*, 2017), we get that the average transition time is reduced from  
718  $\tau(\sigma_{ER}) \sim 10^9 min$  to  $\tau(\sigma_{GC}) \sim 0.1 min$ . According to these estimations, membrane tension  
719 reduction can induce the transition from shallow buds to large transport intermediates.  
720 Interestingly, the possible shape recovery from an elongated carrier back to a shallow bud when  
721 the membrane tension is brought back to the initial large ER tension is  $\Delta F_{2,1}(\sigma_{ER}) \approx 25 k_B T$ .  
722 This estimation suggests that the shrinkage of the carrier upon tension recovery would be  
723 kinetically prevented. Upon fusion of the ERGIC53-containing membranes to the ER exit sites,  
724 the tension of the membrane decreases, after which, tension is brought back to the initial value  
725 by tension diffusion (Shi *et al.*, 2018). Under such cyclic membrane tension changes, from  $\sigma_{ER}$   
726 to  $\sigma_{GC}$ , and then back to  $\sigma_{ER}$ , the system undergoes a hysteretic cycle (**Figure 6A**). Starting at  
727  $\sigma_{ER}$ , the stable shape of the carrier is that of a shallow bud surrounded by a TANGO1 ring  
728 (point (1) in **Figure 6A**). Reduction of the membrane tension to  $\sigma_{GC}$  upon fusion of ERGIC  
729 membranes leads to reduction of the free energy barrier for carrier growth (**Figure 6B**) and  
730 spontaneous transition to a large transport carrier (point (2) in **Figure 6A**). Finally, bringing the  
731 membrane tension back to  $\sigma_{ER}$  does not parallel the shrinkage of the carrier back to a shallow  
732 bud, and the system is kinetically trapped in a large transport intermediate shape, even at high  
733 membrane tension (point (3) in **Figure 6A**).

734

735

## 736 DYNAMIC COMPUTATIONAL MODEL OF TANGO1-ASSISTED TRANSPORT 737 INTERMEDIATE FORMATION

738 The equilibrium model presented here (**Equation (4)**) allowed us to gain valuable insight into  
739 the physical mechanisms by which TANGO1 rings can deform the ER membrane for  
740 procollagen export. However, as any other model, ours is based in a number of assumptions  
741 and has its limitations. First, it is an equilibrium model, so the shapes of the carriers are found  
742 as those that locally minimize the free energy of the system. Hence, the dynamic behavior of  
743 shape transitions and protein redistribution cannot be fully grasped in a quantitative manner.  
744 Second, in our model we assumed that COPII coats polymerize as spherical lattices of fixed

745 curvature. Indeed COPII coats usually adopt such shapes (Faini *et al.*, 2013), but it has been  
 746 recently reported that COPII coats can also adopt cylindrical arrangements (Zanetti *et al.*, 2013;  
 747 Ma and Goldberg, 2016). To overcome these two main limitations, we derived a dynamic model  
 748 of TANGO1-assisted transport carrier formation, where there is no imposed constraint on the  
 749 shape of the transport intermediate, besides that of imposing axisymmetric shapes (see  
 750 **Appendix 1** for the detailed description and analysis of the dynamic model) (Tozzi, Walani and  
 751 Arroyo, 2019). Importantly, this dynamic model qualitatively recapitulates the formation of  
 752 TANGO1 rings and their ability to stabilize open carriers (see **Appendix 1**), in accordance with  
 753 our equilibrium model (**Figure 4**).  
 754  
 755

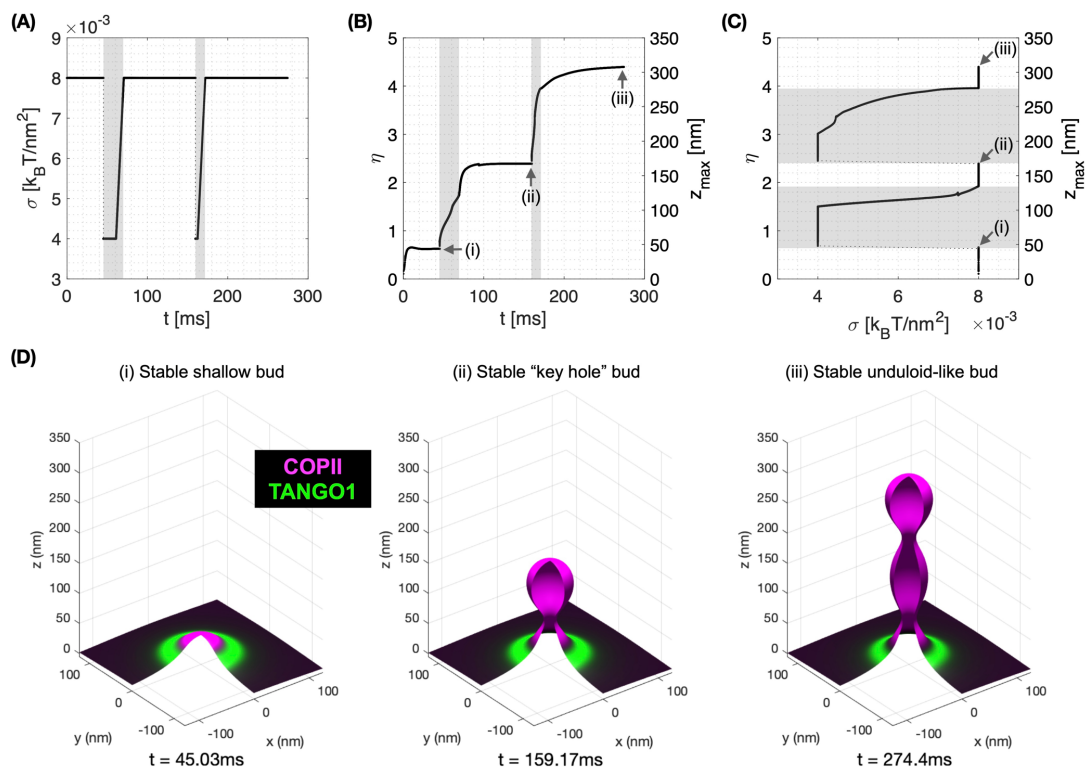

756  
 757 **Figure 7. Membrane tension regulation by TANGO1 enables the formation of large procollagen-**  
 758 **containing transport intermediates.**

759 A transient decrease of membrane tension mimicking ERGIC membrane recruitment by TANGO1 enables  
 760 the sequential growth of COPII-TANGO1 transport intermediates. (A) Computational protocol for the  
 761 applied membrane tension as a function of time. When an equilibrium state is reached,  $\sigma$  is transiently  
 762 reduced from  $0.008$  to  $0.004 k_B T/nm^2$  until the transport intermediate grows to either  $\eta = 1.5$  or  $\eta = 3.5$ .  
 763 Then  $\sigma$  is progressively restored to  $0.008 k_B T/nm^2$  following a linear ramp of  $\sim 10$  ms. (B) Resulting shape  
 764 factor as a function of time. (C) Shape factor as a function of membrane tension. Gray regions in (A-C)  
 765 correspond to low-tension regimes. (D) Three-dimensional rendering of the bud shape and protein surface  
 766 distribution at the three equilibrium shapes indicated in panels (B) and (C). Parameters as in **Appendix**  
 767 **1-Table 1**, with  $\chi_c = -2 k_B T$  (see **Appendix 1** for details, and corresponding **Movie 1** for a dynamic  
 768 representation of the simulation).  
 769  
 770

771 We exploited our dynamic model to understand whether TANGO1-mediated tension regulation  
 772 can dynamically enable carrier elongation for procollagen export. To test this, we simulated the  
 773 sequential decrease of membrane tension representative of the recruitment and fusion of  
 774 ERGIC53-containing vesicles to the procollagen export site. To mimic the presence of  
 775 procollagen molecules inside the growing carrier preventing the total closure of the neck

776 (**Figure 1D-H**), we set a minimum neck radius threshold of 7.5 nm (see **Appendix 1** for details).  
777 Starting from a stable shallow bud of shape parameter,  $\eta \approx 0.6$ , at a large membrane tension of  
778  $\sigma = 0.008 k_B T / nm^2$  (**Figure 7D (i)**), we apply a transient tension reduction as follows. First,  
779 the tension is reduced to  $\sigma = 0.004 k_B T / nm^2$ , leading to bud re-growth. Second, when the  
780 bud height reaches  $\eta = 1.5$  (just after the start of neck closure), the membrane tension is  
781 gradually set back to its original value of  $\sigma = 0.008 k_B T / nm^2$  over a 10 ms time ramp (**Figure**  
782 **7A-C**). We find that the carrier reaches a new equilibrium state at  $\eta \approx 2.4$ , corresponding to a  
783 "key-hole" shape of about 170 nm height (**Figure 7D (ii)**). Next, continuing from this new  
784 equilibrium state, we repeat the transient tension reduction protocol, this time initiating the  
785 ramp to recover high tension for  $\eta = 3.5$ , just after a new neck is formed. Once again, the  
786 transport intermediate evolves towards a new equilibrium "unduloid-like" shape at  $\eta \approx 4.2$   
787 (**Figure 7D (iii)**, and **Movie 1**). Interestingly, this corresponds to a height of about 300 nm, the  
788 typical length of a folded procollagen molecule.

789

790 Altogether, our results support the scenario by which TANGO1 self-organizes around COPII  
791 coats and stabilizes shallow buds at physiological membrane tensions. This mechanism is  
792 enabled by TANGO1 affinity to COPII, TANGO1 ring bending rigidity, and the modulation of  
793 COPII coat line energy. The stability of shallow buds might facilitate procollagen packaging as  
794 well as the recruitment of ERGIC membranes to the ERES. Transient membrane tension  
795 reduction, possibly mediated by fusing ERGIC membranes to the ER, allows the buds to grow  
796 from shallow to elongated pearled transport intermediates of sizes compatible with the  
797 encapsulation of procollagen molecules.

## 798 DISCUSSION

799

### 800 COMPARISON WITH EXPERIMENTAL RESULTS

801 We previously reported that the appearance of well-formed, regular TANGO1 rings at the  
802 ERES correlated with the ability of those cells to efficiently export procollagen from the ER  
803 (Raote *et al.*, 2017, 2018). First, when the association of TANGO1 with COPII subunits was  
804 abrogated—either by expressing TANGO1- $\Delta$ PRD or by silencing the expression of SEC23A—,  
805 TANGO1 formed either smaller rings or long linear filamentous structures or planar clusters.  
806 Second, when the mutual association between individual TANGO1 filament components was  
807 hampered—either by expressing TANGO1- $\Delta$ CC2 or by silencing the expression of cTAGE5—,  
808 TANGO1 formed rings that were of less defined sizes and with more irregular, less circular  
809 shapes. And third, when the association of TANGO1 with the tethering factors that recruit  
810 ERGIC53-containing membranes to the ERES was inhibited—either by expressing TANGO1-  
811  $\Delta$ CC1, TANGO1- $\Delta$ TEER, or by silencing the expression of the tethering factors RINT1,  
812 NBAS, or ZW10—, TANGO1 rings were virtually absent at the ERES.

813

814 In cells expressing TANGO1- $\Delta$ PRD, the interaction between one of the filament components,  
815 TANGO1, and the COPII subunits is abolished, indicating that, although a TANGO1 filament  
816 could still be formed—this mutant does not alter the interaction between TANGO1 and other  
817 TANGO1 or cTAGE5 proteins (Raote *et al.*, 2018)—, the filament should be less able to cap  
818 COPII components, and therefore less line-active, because the affinity to bind to the peripheral  
819 COPII subunits is reduced. In this situation the filament proteins cTAGE5 (Saito *et al.*, 2011,  
820 2014) and TANGO1-Short (Maeda, Saito and Katada, 2016) can still bind Sec23A and  
821 therefore reduce, albeit to a lesser extent than in wild-type cells, the COPII patch line energy.  
822 Our theoretical results presented here predict that decreasing the TANGO1 filament linactant  
823 strength,  $\Delta\lambda$ , results in a lower chance of having open carriers (**Figure 5A**), which can lead to  
824 the observed defects in terms of ring structure and procollagen export.

825

826 In summary, the results we obtained from our physical model of large transport intermediate  
827 formation reinforce the notion that TANGO1 rings serve to control the formation of COPII  
828 carriers. TANGO1 rings can stabilize the COPII bud neck and thus prevent their premature  
829 closure by kinetically arresting or slowing down the completion of a spherical carrier. In such  
830 a situation, carrier expansion—according to the results of our model— can proceed via three  
831 different scenarios (**Figure 4**): (i) increase in the polymerization ability of COPII coats; (ii)  
832 appearance of a directed force applied at the growing carrier and pointing towards the cytosol;  
833 and (iii) local reduction of the membrane tension. TANGO1 can directly or indirectly control  
834 each of these possibilities (Ma and Goldberg, 2016; Raote *et al.*, 2018). Interestingly, the  
835 TANGO1 ring properties, such as the linactant power of TANGO1 or the TANGO1 filament  
836 bending rigidity, are not drivers of the incomplete bud to large transport intermediate transition  
837 (**Figure 5**), but they seem to act more as kinetic controllers of the transition by preventing bud  
838 closure and stabilize open carrier shapes (**Figures 4,5**).

839

### 840 PROPOSAL OF EXPERIMENTAL APPROACHES TO TEST THE MODEL

841 In this article, we proposed and analyzed a theoretical model to understand how TANGO1  
842 molecules assemble into functional rings at the ERES, and how these rings can control the  
843 shape of transport intermediates. Our theoretical results have the potential to open up new  
844 avenues for experimental research on this topic and provide a common framework within which



845 data and results can be understood. In particular, we envision that our work will stimulate future  
846 experimental efforts to test mechanisms of ERES organization and collagen export. We propose  
847 here some possible routes by which the hypotheses and predictions of our model as well as  
848 some of the open questions it raised could be experimentally tested.

849

850 *Does TANGO1 form a linear or quasi-linear filament held together by lateral protein-protein*  
851 *interactions?* A first step to address this question will be to resolve the stoichiometry of the  
852 TANGO1 family proteins within a TANGO1 ring. Controlled photobleaching (Lee *et al.*, 2012)  
853 or DNA-PAINT (Stein *et al.*, 2019) of the single-labeled, endogenously-expressed proteins  
854 would allow the recording of the number and spatial positions of single fluorophores in  
855 individual TANGO1 rings. These results, after complete quantitative reconstruction of all the  
856 single molecule signals, should provide an absolute stoichiometry and ultra-resolved structure  
857 of TANGO1 organization in the ERES. Ultimately, *in vitro* reconstitution of TANGO1 ring  
858 formation in synthetic lipid bilayers by using recombinant proteins will be of paramount  
859 importance to experimentally observe the formation of TANGO1 filaments, assess the minimal  
860 components required for their formation, and eventually measure the elastic properties of a  
861 TANGO1 filament.

862

863 *Is tension homeostasis, controlled by TANGO1-directed fusion of incoming ERGIC*  
864 *membranes, a mechanism for transport intermediate formation?* Future efforts in applying  
865 cutting-edge, super-resolution multicolor live-cell microscopy (Bottanelli *et al.*, 2016; Ito,  
866 Uemura and Nakano, 2018; Liu *et al.*, 2018; Schroeder *et al.*, 2019) will help monitor the fusion  
867 of ERGIC membranes to the ER and couple these events to the formation of procollagen-  
868 containing transport intermediates. In addition, our hypothesis of TANGO1-mediated  
869 regulation of membrane tension is based upon the premise that fusion of ERGIC-53-containing  
870 vesicles to the procollagen export sites locally decreases the membrane tension. A recently-  
871 established fluorescent membrane tension sensor (Colom *et al.*, 2018; Goujon *et al.*, 2019)  
872 could provide a means to monitor such effects in relation to procollagen export.

873

874 *Is there an outwards-directed force driving transport intermediate elongation?* It has been  
875 shown that procollagen export from the ER does not require the presence of an intact  
876 microtubule network (McCaughey *et al.*, 2019), however the involvement of other force-  
877 producing agents, such as actin-myosin networks, remains unknown. The identification of  
878 physiologically meaningful interactors of TANGO1 by proximity-dependent labeling assays,  
879 such as BioID (Roux *et al.*, 2018), and the subsequent screening for candidates that can exert  
880 those forces would set the grounds to identify possible molecular players involved in force-  
881 generation. However, it is important to stress that our model can explain formation of large  
882 transport intermediates even in the absence of an applied force (**Figure 6**).

883

884 *Finally, what is the shape of the transport intermediate that shuttles collagens from the ER to*  
885 *the ERGIC/Golgi complex?* To this end, three-dimensional, multicolor super-resolution  
886 microscopy techniques, such as 3D single molecule localization microscopy (3D-SMLM) or  
887 3D stimulated emission depletion (3D-STED) microscopy, could provide sufficient resolution  
888 to map the three-dimensional morphology of the transport intermediates. Recent efforts by  
889 using 3D-SMLM and correlative light and electron microscopy (CLEM) have revealed the  
890 existence of large procollagen-containing structures (Gorur *et al.*, 2017; Yuan *et al.*, 2018).  
891 However, a recent report suggested that those structures were directed for lysosomal  
892 degradation and not for trafficking to the Golgi complex (Omari *et al.*, 2018). By contrast, direct

893 transport of procollagen between the ER and the Golgi complex by a short-loop pathway in the  
894 absence of large vesicles has been recently proposed (McCaughey *et al.*, 2019), opening to the  
895 possibility of a direct tunneling mechanism for trafficking proteins between compartments  
896 (Raote and Malhotra, 2019). Eventually, the use of modern electron microscopy techniques  
897 such as cryo-electron tomography (Beck and Baumeister, 2016) or focused ion beam-scanning  
898 electron microscopy (FIB-SEM) (Nixon-Abell *et al.*, 2016) will help solve this issue on the  
899 morphology of the transport intermediates that shuttle procollagens from the ER to the Golgi  
900 complex.

901

## 902 **TANGO1 AS A REGULATOR OF MEMBRANE TENSION HOMEOSTASIS**

903 We previously showed that TANGO1 forms circular ring-like structures at ERES surrounding  
904 COPII components (Raote *et al.*, 2017). We also revealed interactions that are required for  
905 TANGO1 ring formation, which are also important to control TANGO1-mediated procollagen  
906 export from the ER (Raote *et al.*, 2018). However, it still remained unclear how TANGO1 rings  
907 organize and coordinate the budding machinery for efficient procollagen-export. Here, we  
908 proposed, described, and analyzed a feasible biophysical mechanism of how TANGO1  
909 mediates the formation of procollagen-containing transport intermediates at the ER. The results  
910 of our model suggest that TANGO1 rings serve as stabilizers of open buds, preventing the  
911 premature formation of standard COPII coats. TANGO1 is ubiquitously expressed in  
912 mammalian cells, including cells that secrete very low amounts of collagen. Furthermore,  
913 TANGO1 resides in most ERES in all these different cell lines, yet small COPII-coated carriers  
914 should form normally in those sites. How can this be understood? We propose that the ability  
915 of TANGO1 to form a ring at COPII-coated ERES is a first requirement for TANGO1 to  
916 promote procollagen export in non-standard COPII-dependent transport intermediates.  
917 Accumulations of export-competent procollagen at the ERES could re-organize the TANGO1  
918 molecules laying there into functional rings surrounding COPII components and kinetically  
919 preventing the formation of small COPII carriers. Tethering of ERGIC53-containing vesicles  
920 mediated by the TANGO1 TEER domain (Raote *et al.*, 2018) could be the trigger to allow for  
921 carrier growth. Importantly, the ER-specific SNARE protein Syntaxin18 and the SNARE  
922 regulator SLY1, which together trigger membrane fusion at the ER, are also required for  
923 procollagen export in a TANGO1-dependent manner (Nogueira *et al.*, 2014). Fusion of ERGIC  
924 membranes to the sites of procollagen export would lead to a local and transient reduction of  
925 the membrane tension (Sens and Turner, 2006), which can promote, according to our theoretical  
926 results, the growth of the COPII carrier. We proposed that ERGIC membranes fuse directly to  
927 the growing transport intermediate to allow for membrane addition and tension release; and  
928 showed that compartment mixing can be arrested by the TANGO1 ring serving as a diffusion  
929 barrier (Raote *et al.*, 2020). In this scenario, TANGO1 would act as a regulator of membrane  
930 tension homeostasis to control procollagen export at the ERES. In parallel, we can also  
931 hypothesize a situation where TANGO1 rings help pushing procollagen molecules into the  
932 growing carrier and couple this pushing force to procollagen folding, through the chaperone  
933 HSP47 (**Figure 1F**). Because HSP47 chaperone assists in folding (and hence in rigidifying)  
934 procollagen, the physical interaction between TANGO1 rings and procollagen/HSP47 could  
935 serve as a means to couple procollagen folding to force production. Although the existence of  
936 this pushing force is largely speculative, it could, according to our model, promote formation  
937 of a large intermediate and hence TANGO1 could act as a sensor of procollagen folding to  
938 couple it with the export machinery.

939

940 Physically, our model can be understood in terms of a competition between different driving  
941 forces. Each of these forces can either prevent or promote the elongation of procollagen-  
942 containing transport intermediates. First, COPII coats normally polymerize following a  
943 spherical arrangement, and the forming COPII lattice has a propensity to reduce the amount of  
944 free edges. Binding of the TANGO1 PRD to these edge-localized peripheral COPII subunits  
945 has a two-fold effect: (i) it prevents binding of other COPII subunits that would complete the  
946 polymerization of the coat into a spherical vesicle, and thereby *inhibits* the fission of the vesicle;  
947 and (ii) by stabilizing the neck of an open carrier, TANGO1 forms a ring around COPII  
948 subunits. Eventually, the inhibition of premature bud fission and therefore the stabilization of  
949 open carriers converts a small bud into a large transport intermediate, and finally into a tunnel  
950 connecting ER to the ERGIC/early Golgi cisternae (Raote and Malhotra, 2019). In physical  
951 terms, the role of TANGO1-PRD in this process is to effectively reduce *line tension* of COPII  
952 coat (by acting as a linactant), without directly changing the *surface tension* of the underlying  
953 membrane. In our view, TANGO1-PRD is important to keep the transport intermediate  
954 connected to the ER by preventing fission of the nascent carrier. Subsequently, fusion of  
955 ERGIC membranes, which locally and transiently decreases the membrane surface tension, will  
956 lead, as our model predicts, to growth of a large transport intermediate (**Figure 1G,H**).

957 What controls the organelle size in the context of intracellular trafficking? There has been a lot  
958 of work on what set the size of organisms, the size of tissues in an organism, and the size of  
959 cells in a tissue. However there has been less work on the question of what sets the size of  
960 organelles relative to the cell. Extensive cargo transfer while trafficking bulky cargoes such as  
961 collagens leads to large amounts of membrane being transferred from one organelle to another.  
962 To maintain organellar homeostasis, loss of membrane from a compartment has to be  
963 concomitantly compensated by membrane acquisition from the biosynthetic pathway or by  
964 trafficking from other organelles; the arrival and departure of membrane at each compartment  
965 has to be efficiently balanced. How is this homeostatic balance controlled? Changes in  
966 membrane tension have been described to affect rates of exocytosis and endocytosis at the  
967 plasma membrane (Apodaca, 2002; Kosmalska *et al.*, 2015; Wu *et al.*, 2017). Interestingly, a  
968 theoretical model has also established a crucial role for membrane tension in modulation the  
969 transition to bud clathrin-coated vesicles (Hassinger *et al.*, 2017). Furthermore, it has been  
970 recently proposed that Atlastin-mediated maintenance of ER membrane tension is required for  
971 the efficient mobility of cargo proteins (Niu *et al.*, 2019). However, control of endomembrane  
972 trafficking by membrane tension is more challenging to study experimentally and hence still  
973 remains poorly understood. We propose that TANGO1 serves as a hub in the ER to connect  
974 different organelles by controlling the local tension homeostasis at specific membrane sub-  
975 domains and regulating the membrane flux between these organelles.

976  
977 In summary, we proposed a theoretical mechanical model that explains how TANGO1  
978 molecules form functional rings at ERES, and how these TANGO1 rings assemble the  
979 machinery required to form a large transport intermediate commensurate with the size of  
980 procollagens. We envision that our hypotheses and the predictions of our model will guide new  
981 lines of experimental research to delineate mechanisms of COPII coats organization for the  
982 export of complex cargoes out of the ER.

## 983 MATERIALS AND METHODS

### 984 985 DETAILED DESCRIPTION OF THE PHYSICAL MODEL OF TANGO1-DEPENDENT 986 TRANSPORT INTERMEDIATE FORMATION

987 Here we present the detailed description and derivation of the physical model of TANGO1-  
988 dependent transport intermediate formation presented in the main text. Our model builds on a  
989 previously presented mechanical model for clathrin-coated vesicle formation (Saleem *et al.*,  
990 2015), which we extended to allow for the growth of larger transport intermediates by  
991 incorporating (i) the effects of TANGO1 rings on COPII coats; (ii) the reduction of the  
992 membrane tension by the tethering and fusion of ERGIC53-containing membranes; and (iii) an  
993 outward-directed force (**Figure 1–figure supplement 1A**).

994  
995 Analogously to the clathrin vesicle model by Saleem *et al.* (Saleem *et al.*, 2015), we consider  
996 that the free energy per unit area of coat polymerization onto the membrane,  $\mu_c$ , has a bipartite  
997 contribution arising from the positive chemical potential of COPII binding to the membrane,  
998  $\mu_c^0$ , and from the negative contribution of membrane deformation by bending, so  $\mu_c = \mu_c^0 -$   
999  $2 \frac{\kappa_b}{R^2}$ , where  $\kappa_b$  is the bending rigidity of the lipid bilayer, and  $R$  is the radius of curvature  
1000 imposed by the spherically polymerized COPII coat. An additional term associated to the  
1001 possible elastic deformation of the COPII coat could be considered as  $\mu_{coat,bend} =$   
1002  $-\frac{1}{2} \kappa_{coat} \left( \frac{2}{R} - \frac{2}{R_{coat}} \right)^2$ , where  $\kappa_{coat}$  is the coat rigidity and  $R_{coat}$  is the spontaneous radius of  
1003 curvature of the coat (Iglič, Slivnik and Kralj-Iglič, 2007; Boucrot *et al.*, 2012). However, we  
1004 assume that the coat is considerably more rigid than the membrane,  $\kappa_{coat} \gg \kappa_b$ , so there is no  
1005 coat deformation and  $R = R_{coat}$ . Alternatively, coat contribution to membrane bending has  
1006 also been tackled by using a spontaneous curvature-based model (Agrawal and Steigmann,  
1007 2009; Hassinger *et al.*, 2017). In our analytical model we follow the approach of Saleem *et al.*  
1008 (Saleem *et al.*, 2015), which allows us to define the preferred spherical architecture of the  
1009 polymerized coat. A spontaneous curvature-based approach was followed for our  
1010 computational analysis of carrier shapes (**Appendix I**). In summary, the free energy per unit  
1011 area of the initially undeformed membrane due to COPII polymerization,  $f_{coat}$ , can be  
1012 expressed as

$$1013$$
$$1014 \quad f_{coat} = \frac{-\mu_c A_c}{A_p}, \quad (\text{M1})$$

1015  
1016 where  $A_c$  is the surface area of the membrane covered by the COPII coat, and  $A_p$  is the projected  
1017 area of the carrier, that is, the area of the initially undeformed membrane under the carrier  
1018 (Saleem *et al.*, 2015) (**Figure 1–figure supplement 1B**). We also need to consider a line energy  
1019 for the coat subunits laying at the edge of the polymerizing structure. This line energy per unit  
1020 area reads as

$$1021$$
$$1022 \quad f_{line}^0 = \lambda_0 \frac{l}{A_p}, \quad (\text{M2})$$

1023  
1024 where  $\lambda_0$  is the line tension of the bare coat, and  $l = 2\pi\rho$  is the length of the carrier edge,  
1025 associated to the opening radius at the base of the carrier,  $\rho$  (**Figure 1–figure supplement 1B**).  
1026 Next, we consider the contribution of the membrane tension,  $\sigma$ , to the free energy per unit area  
1027 of the system, which reads as

1028

$$1029 \quad f_{tension} = \sigma \frac{A_m}{A_p}, \quad (\text{M3})$$

1030

1031 where  $A_m$  is the surface area of the entire membrane after deformation.

1032

1033 The following step is to expand on this model to include the contributions by which TANGO1  
1034 can modulate the formation of a transport intermediate. TANGO1 filaments are described by  
1035 their length,  $L_T$ , and by their persistence length,  $\xi_p = \frac{\kappa_T}{k_B T}$ ,—where  $\kappa_T$  is the filament bending  
1036 rigidity and  $k_B T$  is the thermal energy, equal to the Boltzmann constant times the absolute  
1037 temperature (Doi and Edwards, 1986)—, which describes how stiff the filament is. As long as  
1038 the filament length is not much larger than the persistence length, the bending energy of the  
1039 TANGO1 filament can be expressed as  $F_{bend} = \frac{\kappa_T}{2} \int_{L_T} (c - c_0)^2 dl$ , where  $c$  and  $c_0$  are the  
1040 actual and spontaneous curvature of the filament, respectively, and the integral is performed  
1041 over the entire filament length. We define positive spontaneous curvatures of the filament as  
1042 those where the TANGO1-COPII interacting domains lie on the concave side of the filament,  
1043 and negative when they lie on the convex side. For a TANGO1 filament of length  $L_T$ , that is  
1044 bound to the circular boundary length of a COPII patch (of radius  $\rho$ ), the filament bending  
1045 energy per unit length can be written as  $f_{bend} = \frac{\kappa_T}{2} (1/\rho - c_0)^2 \omega$ , where we assumed that any  
1046 existing filaments not adsorbed to the COPII patches adopt the preferred curvature,  $c_0$ , and  
1047 where  $\omega$  is the capping fraction: the fraction of COPII domain boundary length covered  
1048 (“capped”) by TANGO1 molecules. Hence, analogously to our discussion for the free energy  
1049 of coat binding to the membrane, **Equation (M1)**, we can write the free energy per unit area of  
1050 a TANGO1 filament as

1051

$$1052 \quad f_{T,bend} = -\frac{\mu_T l}{A_p}, \quad (\text{M4})$$

1053

1054 where  $\mu_T = -f_{bend}$  includes the negative contribution of the filament bending energy. A  
1055 positive contribution of the filament assembly chemical potential,  $\mu_T^0$ , is not considered here  
1056 since we assume that the assembly chemical potential is independent of whether the filament is  
1057 capping or not a COPII patch and hence the fraction of TANGO1 monomers forming a filament  
1058 is independent of the capping fraction. Moreover, we want to stress that the bending energy  
1059 penalty of the filament diverges when the bud approaches closure, meaning that either there is  
1060 *uncapping* of the TANGO1 filament from the edge of the COPII coat at narrow necks or the  
1061 shape transition of the carrier goes through intermediate shapes with a relatively large bud neck,  
1062 such as Delaunay shapes (e.g. unduloids) (Naito and Ou-Yang, 1997). This second option is  
1063 analyzed in **Appendix 1**. In addition, TANGO1 proteins have an affinity to bind COPII  
1064 components, and hence adsorb to the boundary of the COPII domains by binding the most  
1065 external subunits. We therefore consider an extra free energy term associated to this TANGO1-  
1066 COPII interaction, which is proportional to the boundary length of the COPII domain capped  
1067 by TANGO1, and hence reads as

1068

$$1069 \quad f_{TANGO1-COPII} = -\Delta\lambda \omega \frac{l}{A_p}, \quad (\text{M5})$$

1070

1071 where  $\Delta\lambda$  is the interaction strength between TANGO1 and COPII. We can write together  
 1072 **Equations (M2) and (M5)** as

$$1073$$

$$1074 \quad f_{line} = \lambda \frac{l}{A_p}, \quad (\text{M6})$$

1075  
 1076 where  $\lambda = \lambda_0 \left(1 - \frac{\Delta\lambda}{\lambda_0} \omega\right)$  can be understood as the effective line tension of the COPII coat, in  
 1077 which  $\Delta\lambda/\lambda_0$  is the relative reduction in the line tension due to TANGO1 capping, and hence  
 1078 is a measure of the linactant power of TANGO1.

1079  
 1080 Finally, the mechanical work performed by the outward-directed force,  $N$ , is also included in  
 1081 the free energy of the system, as

$$1082$$

$$1083 \quad f_f = -\frac{N h}{A_p}, \quad (\text{M7})$$

1084  
 1085 where  $h$  is the length of the carrier (**Figure 1–figure supplement 1B**). At this stage, for the sake  
 1086 of simplicity, we disregard the effects of the growth-shrinkage dynamics of the polymerizing  
 1087 COPII lattice. Hence, the total free energy per unit area of the carrier,  $f_c$ , is the sum of all these  
 1088 contributions **Equations (M1,3,4,6,7)**,

$$1089$$

$$1090$$

$$1091 \quad f_c = f_{coat} + f_{line} + f_{tension} + f_{T,bend} + f_f, \quad (\text{M8})$$

1092  
 1093 which is presented in **Equation (4)** in the main text.

### 1094 1095 **Geometry of the problem**

1096 Based on the proposed geometries for the growing carrier we can distinguish three geometries,  
 1097 depending on how complete the transport intermediate is: shallow buds, deep buds, and pearled  
 1098 intermediates (**Figure 1–figure supplement 1B**, panels (i) to (iii), respectively). These shapes  
 1099 will allow us to calculate as a function of the carrier morphology the geometric parameters that  
 1100 enter in **Equation (4)**, namely, the area of the coat,  $A_c$ , the area of the membrane,  $A_m$ , the  
 1101 projected area,  $A_p$ , and the opening radius at the coat rim,  $\rho$  (Saleem *et al.*, 2015). A convenient  
 1102 quantity to parametrize the shape of the carrier is the height of the carrier,  $h$ , which we will use  
 1103 in a dimensionless manner by normalizing it to the diameter of the spherical COPII bud,  $\eta =$   
 1104  $h/2R$ .

1105  
 1106 (i) *Shallow bud*. For a shallow bud (**Figure 1–figure supplement 1B (i)**), which corresponds to  
 1107 buds smaller than a hemisphere, we can write that  $A_c = A_m = 2\pi R^2 (1 - \cos \theta)$ , where  $0 <$   
 1108  $\theta < \pi/2$  is the opening angle of the bud (see **Figure 1–figure supplement 1B (i)**). In addition,  
 1109  $A_p = \pi \rho^2 = \pi R^2 \sin^2 \theta$ ; and  $h = R(1 - \cos \theta)$ . Expressing these quantities as a function of  
 1110 the shape parameter,  $\eta$ , we obtain

$$1111$$

$$1112 \quad A_c = A_m = 4\pi R^2 \eta : \eta < \frac{1}{2}, \quad (\text{M9})$$

$$1113 \quad A_p = 4\pi R^2 \eta (1 - \eta) : \eta < \frac{1}{2}, \quad (\text{M10})$$

$$1114 \quad \rho = 2R\sqrt{\eta(1 - \eta)} : \eta < \frac{1}{2}. \quad (\text{M11})$$

1115

1116 (ii) *Deep bud*. For a deep bud (**Figure 1–figure supplement 1B (ii)**), which corresponds to buds  
 1117 larger than a hemisphere, we can write that  $A_c = 2\pi R^2 (1 - \cos \theta)$ , where  $\pi/2 < \theta < \pi$ . In  
 1118 addition,  $A_m = \pi R^2 (1 + (1 - \cos \theta)^2)$ ;  $A_p = \pi R^2$ ; and  $h = R(1 - \cos \theta)$ . Expressing these  
 1119 quantities as a function of the shape parameter,  $\eta$ , which in this case ranges between  $1/2 < \eta < 1$ ,  
 1120 we obtain

1121

$$1122 \quad A_c = 4\pi R^2 \eta : \frac{1}{2} < \eta < 1, \quad (\text{M12})$$

$$1123 \quad A_m = \pi R^2 (1 + 4\eta^2) : \frac{1}{2} < \eta < 1, \quad (\text{M13})$$

$$1124 \quad A_p = \pi R^2 : \frac{1}{2} < \eta < 1, \quad (\text{M14})$$

$$1125 \quad \rho = 2R\sqrt{\eta(1-\eta)} : \frac{1}{2} < \eta < 1. \quad (\text{M15})$$

1126

1127 (iii) *Pearled intermediate*. A pearled intermediate corresponds to carriers form by an  
 1128 incomplete bud with opening angle  $0 < \theta < \pi$ , connected via a narrow connection with  $n$   
 1129 complete buds (**Figure 1–figure supplement 1B (iii)**). Here, we can write that  $A_c =$   
 1130  $2\pi R^2 [2n + (1 - \cos \theta)]$ , where  $0 < \theta < \pi$  and  $n \geq 1$ . In addition,  $A_m = \pi R^2 [4n + 1 +$   
 1131  $(1 - \cos \theta)^2]$ ;  $A_p = \pi R^2$ ; and  $h = R(2n + 1 - \cos \theta)$ . Expressing these quantities as a  
 1132 function of the shape parameter,  $\eta$ , we obtain

1133

$$1134 \quad A_c = 4\pi R^2 \eta : \eta > 1, \quad (\text{M16})$$

$$1135 \quad A_m = \pi R^2 (1 + 4n + 4(\eta - n)^2) : \eta > 1, \quad (\text{M17})$$

$$1136 \quad A_p = \pi R^2 : \eta > 1, \quad (\text{M18})$$

$$1137 \quad \rho = 2R\sqrt{(\eta - n) - (\eta - n)^2} : \eta > 1. \quad (\text{M19})$$

1138

1139 Putting together **Equations (M9-19)**, we get:

1140

$$1141 \quad A_c = 4\pi R^2 \eta \quad (\text{M20})$$

$$1142 \quad A_m = \begin{cases} 4\pi R^2 \eta, & \eta < 1/2 \\ \pi R^2 [1 + 4n + 4(\eta - n)^2], & \eta > 1/2 \end{cases} \quad (\text{M21})$$

$$1143 \quad A_p = \begin{cases} 4\pi R^2 \eta (1 - \eta), & \eta < 1/2 \\ \pi R^2, & \eta > 1/2 \end{cases} \quad (\text{M22})$$

$$1144 \quad \rho = 2R\sqrt{(\eta - n)(1 - \eta + n)}, \quad (\text{M23})$$

$$1145 \quad h = 2R\eta. \quad (\text{M24})$$

1146

1147

1148 where  $n = [\eta]$  is the number of complete pearls, the brackets denoting the integer part operator.

1149 This allows us to express **Equation (4)** as

1150

$$1151 \quad \Delta f_c = \frac{\sigma\eta - \tilde{\mu}}{1-\eta} + \frac{\tilde{\lambda}(\omega)}{\sqrt{\eta(1-\eta)}} - \frac{4\omega \tilde{\kappa}_T c_0 R}{\eta(1-\eta)} + \frac{\omega \tilde{\kappa}_T}{[\eta(1-\eta)]^{3/2}}, \quad \eta < 1/2 \quad (\text{M25})$$

1152

$$1153 \quad \Delta f_c = 4\sigma[n + (\eta - n)^2] - 4\tilde{\mu}\eta + 4\tilde{\lambda}(\omega)\sqrt{(\eta - n)(1 - \eta + n)} +$$

$$1154 \quad 4\omega\tilde{\kappa}_T \left[ \frac{1}{\sqrt{(\eta - n)(1 - \eta + n)}} - 4c_0 R \right], \quad \eta > 1/2, \quad (\text{M26})$$

1155

1156 where  $\tilde{\mu} = \mu_c^0 - 2 \frac{\kappa_b}{R^2} + \frac{N}{2\pi R}$ ,  $\tilde{\lambda}(\omega) = \frac{(\lambda_0 - \omega \Delta\lambda)}{R} + 4\omega\tilde{\kappa}_T(c_0R)^2$ , and  $\tilde{\kappa}_T = \frac{\kappa_T}{8R^3}$  (**Equation (6)**)  
1157 in the main text).



## 1158 **ACKNOWLEDGEMENTS**

1159 We thank Javier Diego Íñiguez, Iván López-Montero, and members of the Garcia-Parajo lab  
1160 for valuable discussions. M.F. Garcia-Parajo and V. Malhotra are Institució Catalana de  
1161 Recerca i Estudis Avançats professors at ICFO-Institut de Ciències Fotoniques and the Centre  
1162 for Genomic Regulation (CRG), respectively. M. Chabanon, M.F. Garcia-Parajo and F.  
1163 Campelo acknowledge support by the Spanish Ministry of Economy and Competitiveness  
1164 (“Severo Ochoa” Programme for Centres of Excellence in R&D (SEV-2015-0522), BFU2015-  
1165 73288-JIN, FIS2015-63550-R and FIS2017-89560-R), Fundacion Privada Cellex, Fundació  
1166 Privada Mir-Puig, Generalitat de Catalunya through the CERCA program, ERC Advanced  
1167 Grant NANO-MEMEC (GA 788546) and LaserLab 4 Europe (GA 654148). I. Raote and V.  
1168 Malhotra acknowledge funding by grants from the Ministerio de Economía, Industria y  
1169 Competitividad Plan Nacional (BFU2013-44188-P) and Consolider (CSD2009-00016);  
1170 support of the Spanish Ministry of Economy and Competitiveness, through the Programmes  
1171 “Centro de Excelencia Severo Ochoa 2013–2017” (SEV-2012–0208) and Maria de Maeztu  
1172 Units of Excellence in R and D (MDM-2015–0502); and support of the CERCA  
1173 Programme/Generalitat de Catalunya. I. Raote, M.F. Garcia-Parajo, V. Malhotra., and F.  
1174 Campelo acknowledge initial support by a BIST Ignite Grant (eTANGO). I. Raote  
1175 acknowledges support from the Spanish Ministry of Science, Innovation and Universities (IJCI-  
1176 2017-34751). F. Campelo acknowledges support from the Ministerio de Ciencia, Innovación y  
1177 Universidades (RYC-2017-22227). This work reflects only the authors’ views, and the EU  
1178 Community is not liable for any use that may be made of the information contained therein. M.  
1179 Arroyo and N. Walani acknowledge the support of the European Research Council (CoG-  
1180 681434), and M. Arroyo that of the Generalitat de Catalunya (2017-SGR-1278 and ICREA  
1181 Academia prize for excellence in research) and of the Spanish Ministry of Economy and  
1182 Competitiveness, through the Severo Ochoa Programme (CEX2018-000797- S).

1183 **TABLE 1: Parameters used in the large transport intermediate formation model.** The free  
 1184 energy **Equation (4)** depends on a number of different parameters, which are described in this  
 1185 table.  
 1186

| Parameter       | Description                           | Value                                                                       | Notes                                                                | Reference                                                                          |
|-----------------|---------------------------------------|-----------------------------------------------------------------------------|----------------------------------------------------------------------|------------------------------------------------------------------------------------|
| $\sigma$        | Membrane tension                      | $0.003 k_B T / nm^2$<br>(ER);<br>$0.0012 k_B T / nm^2$<br>(Golgi membranes) |                                                                      | (Upadhyaya and Sheetz, 2004)                                                       |
| $\kappa_b$      | Membrane bending rigidity             | $20 k_B T$                                                                  |                                                                      | (Niggemann, Kummrow and Helfrich, 1995)                                            |
| $R$             | Radius of curvature of the COPII coat | $37.5 nm$                                                                   |                                                                      | (Miller and Schekman, 2013)                                                        |
| $\lambda_0$     | Bare coat line tension                | $0.012 k_B T / nm$                                                          | Not measured for COPII. Used the clathrin value as a reference       | (Saleem <i>et al.</i> , 2015)                                                      |
| $\mu_c^0$       | COPII coat binding energy             | $0.024 \pm 0.012 k_B T / nm^2$                                              | Not measured for COPII. Used the clathrin values as a reference      | (Saleem <i>et al.</i> , 2015)                                                      |
| $\kappa_T$      | TANGO1 filament bending rigidity      | $120 k_B T nm$                                                              | Not measured. Range based on standard filament rigidities (see text) |                                                                                    |
| $c_0$           | TANGO1 filament spontaneous curvature | $(-0.02, 0.02) nm^{-1}$                                                     | Not measured. Range based on observed TANGO1 ring sizes.             | (Raote <i>et al.</i> , 2017)                                                       |
| $\Delta\lambda$ | Linactant TANGO1 effect               | $0.12 k_B T / nm$                                                           | Not measured. Range based on protein-protein affinity (see text)     | -                                                                                  |
| $N$             | Outwards directed force               | $0 - 5 k_B T / nm$                                                          | Not measured. Range based on known intracellular forces.             | (Kovar and Pollard, 2004) (Actin); (Block <i>et al.</i> , 2003) (Molecular motors) |

## 1187 REFERENCES

1188

1189 Agrawal, A. and Steigmann, D. J. (2009) ‘Modeling protein-mediated morphology in  
1190 biomembranes’, *Biomechanics and Modeling in Mechanobiology*, 8(5), pp. 371–379. doi:  
1191 10.1007/s10237-008-0143-0.

1192 Apodaca, G. (2002) ‘Modulation of membrane traffic by mechanical stimuli’, *American*  
1193 *Journal of Physiology-Renal Physiology*. American Physiological Society Bethesda, MD ,  
1194 282(2), pp. F179–F190. doi: 10.1152/ajprenal.2002.282.2.F179.

1195 Aridor, M. (2018) ‘COPII gets in shape: Lessons derived from morphological aspects of early  
1196 secretion.’, *Traffic (Copenhagen, Denmark)*, 19(11), pp. 823–839. doi: 10.1111/tra.12603.

1197 Bacia, K. *et al.* (2011) ‘Multibudded tubules formed by COPII on artificial liposomes’,  
1198 *Scientific Reports*. Nature Publishing Group, 1(1), pp. 1–6. doi: 10.1038/srep00017.

1199 Bannykh, S. I., Rowe, T. and Balch, W. E. (1996) ‘The organization of endoplasmic  
1200 reticulum export complexes’, *Journal of Cell Biology*, 135(1), pp. 19–35. doi:  
1201 10.1083/jcb.135.1.19.

1202 Bard, F. *et al.* (2006) ‘Functional genomics reveals genes involved in protein secretion and  
1203 Golgi organization.’, *Nature*, 439(February), pp. 604–607. doi: 10.1038/nature04377.

1204 Beck, M. and Baumeister, W. (2016) ‘Cryo-Electron Tomography: Can it Reveal the  
1205 Molecular Sociology of Cells in Atomic Detail?’, *Trends in Cell Biology*, 26(11), pp. 825–  
1206 837. doi: 10.1016/j.tcb.2016.08.006.

1207 Block, S. M. *et al.* (2003) ‘Probing the kinesin reaction cycle with a 2D optical force clamp.’,  
1208 *Proceedings of the National Academy of Sciences of the United States of America*, 100(5), pp.  
1209 2351–6. doi: 10.1073/pnas.0436709100.

1210 Bottanelli, F. *et al.* (2016) ‘Two-colour live-cell nanoscale imaging of intracellular targets’,  
1211 *Nature Communications*. Nature Publishing Group, 7(1), p. 10778. doi:  
1212 10.1038/ncomms10778.

1213 Boucrot, E. *et al.* (2012) ‘Membrane fission is promoted by insertion of amphipathic helices  
1214 and is restricted by crescent BAR domains’, *Cell*. 2012/04/03, 149(1), pp. 124–136. doi:  
1215 10.1016/j.cell.2012.01.047.

1216 Buehler, M. J. (2008) ‘Nanomechanics of collagen fibrils under varying cross-link densities:  
1217 Atomistic and continuum studies’, *Journal of the Mechanical Behavior of Biomedical*  
1218 *Materials*, 1(1), pp. 59–67. doi: 10.1016/j.jmbbm.2007.04.001.

1219 Campelo, F. *et al.* (2017) ‘Sphingomyelin metabolism controls the shape and function of the  
1220 golgi cisternae’, *eLife*, 6. doi: 10.7554/eLife.24603.

1221 Colom, A. *et al.* (2018) ‘A fluorescent membrane tension probe’, *Nature Chemistry*. Nature  
1222 Publishing Group, 10(11), pp. 1118–1125. doi: 10.1038/s41557-018-0127-3.

1223 Derényi, I., Jülicher, F. and Prost, J. (2002) ‘Formation and interaction of membrane tubes.’,  
1224 *Physical review letters*, 88(23), p. 238101. doi: 10.1103/PhysRevLett.88.238101.

1225 Derganc, J., Antonny, B. and Čopič, A. (2013) ‘Membrane bending: The power of protein  
1226 imbalance’, *Trends in Biochemical Sciences*. Elsevier Current Trends, pp. 576–584. doi:  
1227 10.1016/j.tibs.2013.08.006.

1228 Doi, M. (Masao) and Edwards, S. F. (Sam F. (1986) *The theory of polymer dynamics*.  
1229 Clarendon Press.

1230 Faini, M. *et al.* (2013) ‘Vesicle coats: structure, function, and general principles of  
1231 assembly.’, *Trends in cell biology*, 23(6), pp. 279–88. doi: 10.1016/j.tcb.2013.01.005.

1232 Fletcher, D. A. and Mullins, R. D. (2010) ‘Cell mechanics and the cytoskeleton.’, *Nature*,

- 1233 463(7280), pp. 485–92. doi: 10.1038/nature08908.
- 1234 Glick, B. S. (2017) *New insights into protein secretion: TANGO1 runs rings around the COP*  
1235 *II coat*, *Journal of Cell Biology*. doi: 10.1083/jcb.201701142.
- 1236 Gorur, A. *et al.* (2017) ‘COPII-coated membranes function as transport carriers of  
1237 intracellular procollagen I’, 216(6), pp. 1745–1759. doi: 10.1083/jcb.201702135.
- 1238 Goujon, A. *et al.* (2019) ‘Mechanosensitive Fluorescent Probes to Image Membrane Tension  
1239 in Mitochondria, Endoplasmic Reticulum, and Lysosomes’, *Journal of the American*  
1240 *Chemical Society*. American Chemical Society, 141(8), pp. 3380–3384. doi:  
1241 10.1021/jacs.8b13189.
- 1242 Hassinger, J. E. *et al.* (2017) ‘Design principles for robust vesiculation in clathrin-mediated  
1243 endocytosis.’, *Proceedings of the National Academy of Sciences of the United States of*  
1244 *America*. National Academy of Sciences, 114(7), pp. E1118–E1127. doi:  
1245 10.1073/pnas.1617705114.
- 1246 Hutchings, J. *et al.* (2018) ‘Subtomogram averaging of COPII assemblies reveals how coat  
1247 organization dictates membrane shape’, *Nature Communications*, 9(1), p. 4154. doi:  
1248 10.1038/s41467-018-06577-4.
- 1249 Iglič, A., Slivnik, T. and Kralj-Iglič, V. (2007) ‘Elastic properties of biological membranes  
1250 influenced by attached proteins’, *Journal of Biomechanics*, 40(11), pp. 2492–2500. doi:  
1251 10.1016/j.jbiomech.2006.11.005.
- 1252 Ishikawa, Y. *et al.* (2016) ‘Intracellular mechanisms of molecular recognition and sorting for  
1253 transport of large extracellular matrix molecules’, *Proceedings of the National Academy of*  
1254 *Sciences*. doi: 10.1073/pnas.1609571113.
- 1255 Ito, Y., Uemura, T. and Nakano, A. (2018) ‘The Golgi entry core compartment functions as a  
1256 COPII-independent scaffold for ER-to-Golgi transport in plant cells’, *J Cell Sci*. The  
1257 Company of Biologists Ltd, 131(2), p. jcs203893. doi: 10.1242/JCS.203893.
- 1258 Kadler, K. E. *et al.* (2007) ‘Collagens at a glance’, *Journal of Cell Science*, 120(12).
- 1259 Kosmalska, A. J. *et al.* (2015) ‘Physical principles of membrane remodelling during cell  
1260 mechanoadaptation’, *Nature Communications*. Nature Publishing Group, 6(1), p. 7292. doi:  
1261 10.1038/ncomms8292.
- 1262 Koster, G. *et al.* (2003) ‘Membrane tube formation from giant vesicles by dynamic  
1263 association of motor proteins’, *Proceedings of the National Academy of Sciences*, 100(26),  
1264 pp. 15583–15588. doi: 10.1073/pnas.2531786100.
- 1265 Kovar, D. R. and Pollard, T. D. (2004) ‘Insertional assembly of actin filament barbed ends in  
1266 association with formins produces piconewton forces.’, *Proceedings of the National Academy*  
1267 *of Sciences of the United States of America*, 101(41), pp. 14725–30. doi:  
1268 10.1073/pnas.0405902101.
- 1269 Kozlov, M. M. *et al.* (2014) ‘Mechanisms shaping cell membranes’, *Current Opinion in Cell*  
1270 *Biology*, 29(1). doi: 10.1016/j.ceb.2014.03.006.
- 1271 Landau, L. D. and Lifshitz, E. M. (1986) *Theory of elasticity*. 3rd edn, *Course of theoretical*  
1272 *physics*. 3rd edn. oxford: Pergamon.
- 1273 Leduc, C. *et al.* (2004) ‘Cooperative extraction of membrane nanotubes by molecular  
1274 motors’, *Proceedings of the National Academy of Sciences*, 101(49), pp. 17096–17101. doi:  
1275 10.1073/pnas.0406598101.
- 1276 Lee, S.-H. *et al.* (2012) ‘Counting single photoactivatable fluorescent molecules by  
1277 photoactivated localization microscopy (PALM)’, *Proceedings of the National Academy of*  
1278 *Sciences*, 109(43), pp. 17436–17441. doi: 10.1073/pnas.1215175109.
- 1279 Lekszas, C. *et al.* (2020) ‘Biallelic TANGO1 mutations cause a novel syndromal disease due

- 1280 to hampered cellular collagen secretion', *eLife*. eLife Sciences Publications Ltd, 9. doi:  
1281 10.7554/eLife.51319.
- 1282 Liu, M. *et al.* (2017) 'Tango1 spatially organizes ER exit sites to control ER export', *Journal*  
1283 *of Cell Biology*. doi: 10.1083/jcb.201611088.
- 1284 Liu, T.-L. *et al.* (2018) 'Observing the cell in its native state: Imaging subcellular dynamics in  
1285 multicellular organisms.', *Science (New York, N.Y.)*. American Association for the  
1286 Advancement of Science, 360(6386), p. eaaq1392. doi: 10.1126/science.aaq1392.
- 1287 Luxton, G. W. G. *et al.* (2010) 'Linear arrays of nuclear envelope proteins harness retrograde  
1288 actin flow for nuclear movement.', *Science (New York, N.Y.)*, 329(5994), pp. 956–9. doi:  
1289 10.1126/science.1189072.
- 1290 Ma, W. and Goldberg, J. (2016) 'TANGO1/cTAGE5 receptor as a polyvalent template for  
1291 assembly of large COPII coats', *Proceedings of the National Academy of Sciences*. doi:  
1292 10.1073/pnas.1605916113.
- 1293 Maeda, M., Katada, T. and Saito, K. (2017) 'TANGO1 recruits Sec16 to coordinately  
1294 organize ER exit sites for efficient secretion', *The Journal of Cell Biology*, 216(6), pp. 1731–  
1295 1743. doi: 10.1083/jcb.201703084.
- 1296 Maeda, M., Saito, K. and Katada, T. (2016) 'Distinct isoform-specific complexes of  
1297 TANGO1 cooperatively facilitate collagen secretion from the endoplasmic reticulum',  
1298 *Molecular Biology of the Cell*. doi: 10.1091/mbc.E16-03-0196.
- 1299 Matsuoka, K. *et al.* (2001) 'Surface structure of the COPII-coated vesicle', *Proceedings of the*  
1300 *National Academy of Sciences of the United States of America*, 98(24), pp. 13705–13709. doi:  
1301 10.1073/pnas.241522198.
- 1302 McCaughey, J. *et al.* (2019) 'ER-to-Golgi trafficking of procollagen in the absence of large  
1303 carriers', *The Journal of Cell Biology*, 218(3), pp. 929–948. doi: 10.1083/jcb.201806035.
- 1304 McCaughey, J. and Stephens, D. J. (2019) 'ER-to-Golgi Transport: A Sizeable Problem',  
1305 *Trends in Cell Biology*. Elsevier Ltd, pp. 940–953. doi: 10.1016/j.tcb.2019.08.007.
- 1306 Miller, E. A. and Schekman, R. (2013) 'COPII - a flexible vesicle formation system.',  
1307 *Current opinion in cell biology*, 25(4), pp. 420–7. doi: 10.1016/j.ceb.2013.04.005.
- 1308 Mironov, A. A. *et al.* (2003) 'ER-to-Golgi carriers arise through direct en bloc protrusion and  
1309 multistage maturation of specialized ER exit domains.', *Developmental cell*. Elsevier, 5(4),  
1310 pp. 583–94. doi: 10.1016/S1534-5807(03)00294-6.
- 1311 Mouw, J. K., Ou, G. and Weaver, V. M. (2014) 'Extracellular matrix assembly: a multiscale  
1312 deconstruction', *Nature Reviews Molecular Cell Biology*, 15(12), pp. 771–785. doi:  
1313 10.1038/nrm3902.
- 1314 Naito, H. and Ou-Yang, Z. (1997) 'Analytical solutions to Helfrich variation problem for  
1315 shapes of lipid bilayer vesicles'. 物性研究刊行会.
- 1316 Niggemann, G., Kummrow, M. and Helfrich, W. (1995) 'The bending rigidity of  
1317 phosphatidylcholine bilayers: dependences on experimental method, sample cell sealing and  
1318 temperature', *Journal de Physique II*. EDP Sciences, 5(3), pp. 413–425. doi:  
1319 10.1051/jp2:1995141.
- 1320 Niu, L. *et al.* (2019) 'Atlastin-mediated membrane tethering is critical for cargo mobility and  
1321 exit from the endoplasmic reticulum', *Proceedings of the National Academy of Sciences of*  
1322 *the United States of America*. National Academy of Sciences, 116(28), pp. 14029–14038. doi:  
1323 10.1073/pnas.1908409116.
- 1324 Nixon-Abell, J. *et al.* (2016) 'Increased spatiotemporal resolution reveals highly dynamic  
1325 dense tubular matrices in the peripheral ER', *Science*, 354(6311).

- 1326 Nogueira, C. *et al.* (2014) ‘SLY1 and syntaxin 18 specify a distinct pathway for procollagen  
1327 VII export from the endoplasmic reticulum’, *eLife*. doi: 10.7554/eLife.02784.
- 1328 Omari, S. *et al.* (2018) ‘Noncanonical autophagy at ER exit sites regulates procollagen  
1329 turnover.’, *Proceedings of the National Academy of Sciences of the United States of America*.  
1330 National Academy of Sciences, 115(43), pp. E10099–E10108. doi:  
1331 10.1073/pnas.1814552115.
- 1332 Peotter, J. *et al.* (2019) ‘COPII-mediated trafficking at the ER/ERGIC interface’, *Traffic*.  
1333 Blackwell Munksgaard, pp. 491–503. doi: 10.1111/tra.12654.
- 1334 Pinot, M., Goud, B. and Manneville, J.-B. (2010) ‘Physical aspects of COPI vesicle  
1335 formation.’, *Molecular membrane biology*, 27(8), pp. 428–42. doi:  
1336 10.3109/09687688.2010.510485.
- 1337 Raote, I. *et al.* (2017) ‘TANGO1 assembles into rings around COPII coats at ER exit sites.’,  
1338 *The Journal of cell biology*. Rockefeller University Press, 216(4), pp. 901–909. doi:  
1339 10.1083/jcb.201608080.
- 1340 Raote, I. *et al.* (2018) ‘TANGO1 builds a machine for collagen export by recruiting and  
1341 spatially organizing COPII, tethers and membranes’, *eLife*, 7. doi: 10.7554/eLife.32723.
- 1342 Raote, I. *et al.* (2020) ‘TANGO1 membrane helices create a lipid diffusion barrier at curved  
1343 membranes’, *eLife*, 9, p. e57822. doi: 10.7554/eLife.57822.
- 1344 Raote, I. and Malhotra, V. (2019) ‘Protein transport by vesicles and tunnels.’, *The Journal of*  
1345 *cell biology*. Rockefeller University Press, p. jcb.201811073. doi: 10.1083/jcb.201811073.
- 1346 Reynolds, H. M. *et al.* (2019) ‘Tango1 coordinates the formation of endoplasmic reticulum/  
1347 Golgi docking sites to mediate secretory granule formation’, *Journal of Biological Chemistry*.  
1348 American Society for Biochemistry and Molecular Biology Inc., 294(51), pp. 19498–19510.  
1349 doi: 10.1074/jbc.RA119.011063.
- 1350 Robinson, D. G. *et al.* (2015) ‘Vesicles versus Tubes: Is Endoplasmic Reticulum-Golgi  
1351 Transport in Plants Fundamentally Different from Other Eukaryotes?’, *Plant Physiology*.  
1352 American Society of Plant Biologists, 168(2), pp. 393–406. doi: 10.1104/PP.15.00124.
- 1353 Roux, A. *et al.* (2002) ‘A minimal system allowing tubulation with molecular motors pulling  
1354 on giant liposomes’, *Proceedings of the National Academy of Sciences*, 99(8), pp. 5394–5399.  
1355 doi: 10.1073/pnas.082107299.
- 1356 Roux, K. J. *et al.* (2018) ‘BioID: A Screen for Protein-Protein Interactions’, in *Current*  
1357 *Protocols in Protein Science*. Hoboken, NJ, USA: John Wiley & Sons, Inc., pp. 19.23.1-  
1358 19.23.15. doi: 10.1002/cpps.51.
- 1359 Saito, K. *et al.* (2009) ‘TANGO1 facilitates cargo loading at endoplasmic reticulum exit  
1360 sites’, *Cell*. 2009/03/10, 136(5), pp. 891–902. doi: S0092-8674(08)01630-9  
1361 [pii]10.1016/j.cell.2008.12.025.
- 1362 Saito, K. *et al.* (2011) ‘cTAGE5 mediates collagen secretion through interaction with  
1363 TANGO1 at endoplasmic reticulum exit sites’, *Mol Biol Cell*. 2011/04/29, 22(13), pp. 2301–  
1364 2308. doi: mbc.E11-02-0143 [pii]10.1091/mbc.E11-02-0143.
- 1365 Saito, K. *et al.* (2014) ‘Concentration of Sec12 at ER exit sites via interaction with cTAGE5  
1366 is required for collagen export’, *Journal of Cell Biology*. doi: 10.1083/jcb.201312062.
- 1367 Saleem, M. *et al.* (2015) ‘A balance between membrane elasticity and polymerization energy  
1368 sets the shape of spherical clathrin coats’, *Nature Communications*, 6(1), p. 6249. doi:  
1369 10.1038/ncomms7249.
- 1370 Santos, A. J. M. *et al.* (2015) ‘TANGO1 recruits ERGIC membranes to the endoplasmic  
1371 reticulum for procollagen export’, *eLife*. doi: 10.7554/eLife.10982.001.
- 1372 Schroeder, L. K. *et al.* (2019) ‘Dynamic nanoscale morphology of the ER surveyed by STED

- 1373 microscopy’, *The Journal of cell biology*. Rockefeller University Press, 218(1), pp. 83–96.  
1374 doi: 10.1083/jcb.201809107.
- 1375 Sens, P. and Rao, M. (2013) ‘Chapter 18 – (Re)Modeling the Golgi’, in *Methods in Cell*  
1376 *Biology*, pp. 299–310. doi: 10.1016/B978-0-12-417164-0.00018-5.
- 1377 Sens, P. and Turner, M. S. (2006) ‘Budded membrane microdomains as tension regulators’,  
1378 *Physical Review E*, 73(3), p. 031918. doi: 10.1103/PhysRevE.73.031918.
- 1379 Shi, Z. *et al.* (2018) ‘Cell Membranes Resist Flow’, *Cell*. Cell Press, 175(7), pp. 1769-  
1380 1779.e13. doi: 10.1016/j.cell.2018.09.054.
- 1381 Stein, J. *et al.* (2019) ‘Toward Absolute Molecular Numbers in DNA-PAINT’, *Nano Letters*,  
1382 19(11), pp. 8182–8190. doi: 10.1021/acs.nanolett.9b03546.
- 1383 Tozzi, C., Walani, N. and Arroyo, M. (2019) ‘Out-of-equilibrium mechanochemistry and self-  
1384 organization of fluid membranes interacting with curved proteins’, *New Journal of Physics*.  
1385 IOP Publishing, 21(9), p. 093004. doi: 10.1088/1367-2630/ab3ad6.
- 1386 Trabelsi, S. *et al.* (2008) ‘Linactants: Surfactant Analogues in Two Dimensions’, *Physical*  
1387 *Review Letters*, 100(3), p. 037802. doi: 10.1103/PhysRevLett.100.037802.
- 1388 Upadhyaya, A. and Sheetz, M. P. (2004) ‘Tension in tubulovesicular networks of Golgi and  
1389 endoplasmic reticulum membranes.’, *Biophysical journal*, 86(5), pp. 2923–8. doi:  
1390 10.1016/S0006-3495(04)74343-X.
- 1391 Watson, P. *et al.* (2005) ‘Coupling of ER exit to microtubules through direct interaction of  
1392 COPII with dynactin.’, *Nature cell biology*, 7(1), pp. 48–55. doi: 10.1038/ncb1206.
- 1393 Watson, P. and Stephens, D. J. (2005) ‘ER-to-Golgi transport: Form and formation of  
1394 vesicular and tubular carriers’, *Biochimica et Biophysica Acta - Molecular Cell Research*.  
1395 Elsevier, pp. 304–315. doi: 10.1016/j.bbamcr.2005.03.003.
- 1396 Wilson, D. G. *et al.* (2011) ‘Global defects in collagen secretion in a Mia3/TANGO1  
1397 knockout mouse’, *J Cell Biol.* 2011/05/25, 193(5), pp. 935–951. doi: jcb.201007162  
1398 [pii]10.1083/jcb.201007162.
- 1399 Wu, X.-S. *et al.* (2017) ‘Membrane Tension Inhibits Rapid and Slow Endocytosis in  
1400 Secretory Cells.’, *Biophysical journal*, 113(11), pp. 2406–2414. doi:  
1401 10.1016/j.bpj.2017.09.035.
- 1402 Yang, S.-T., Kiessling, V. and Tamm, L. K. (2016) ‘Line tension at lipid phase boundaries as  
1403 driving force for HIV fusion peptide-mediated fusion’, *Nature Communications*, 7(1), p.  
1404 11401. doi: 10.1038/ncomms11401.
- 1405 Yuan, L. *et al.* (2018) ‘TANGO1 and SEC12 are copackaged with procollagen I to facilitate  
1406 the generation of large COPII carriers’, *Proc Natl Acad Sci U S A*, 115(52), pp. E12255–  
1407 E12264. doi: 10.1073/pnas.1814810115.
- 1408 Zanetti, G. *et al.* (2013) ‘The structure of the COPII transport-vesicle coat assembled on  
1409 membranes’, *Elife*. 2013/09/26, 2, p. e00951. doi: 10.7554/eLife.00951.
- 1410 Zeuschner, D. *et al.* (2006) ‘Immuno-electron tomography of ER exit sites reveals the  
1411 existence of free COPII-coated transport carriers’, *Nature Cell Biology*. Nature Publishing  
1412 Group, 8(4), pp. 377–383. doi: 10.1038/ncb1371.
- 1413
- 1414

1415 **SUPPLEMENTARY FIGURES**

1416

1417 **Figure 1–figure supplement 1**

1418

1419

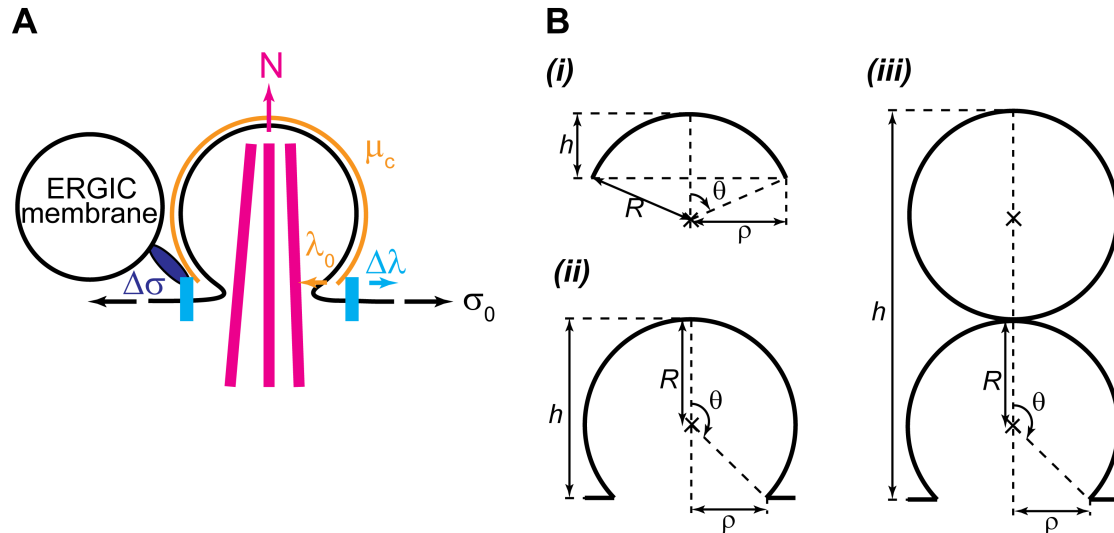

1420

1421 **Figure 1–figure supplement 1. Geometry and physical forces in the transport intermediate**  
 1422 **generation model.**

1423 **(A)** TANGO1 rings assembling on the ER membrane are depicted in light blue, accounting for a line  
 1424 tension reduction of the COPII coat,  $\Delta\lambda$ . The ER membrane is shown in black, associated with a  
 1425 tension,  $\sigma_0$ . The COPII coat polymerizing on the membrane is depicted in orange, and accounts for a  
 1426 coat binding free energy (or chemical potential),  $\mu_c$ , and a COPII coat line tension,  $\lambda_0$ . Packaged  
 1427 procollagen rods are shown in magenta, which can (but not necessarily) contribute with a pushing  
 1428 normal force,  $N$ . Finally, ERGIC53-containing membranes tethered to the export site through the NRZ  
 1429 complex (dark blue) can lead to a membrane tension reduction,  $\Delta\sigma$ . **(B)** Scheme of the carrier geometry  
 1430 used for shallow buds (i), deep buds (ii); and pearled carriers (iii). See Materials and Methods for the  
 1431 detailed description of the geometric parameters.



1432 **Figure 2–figure supplement 1**

1433

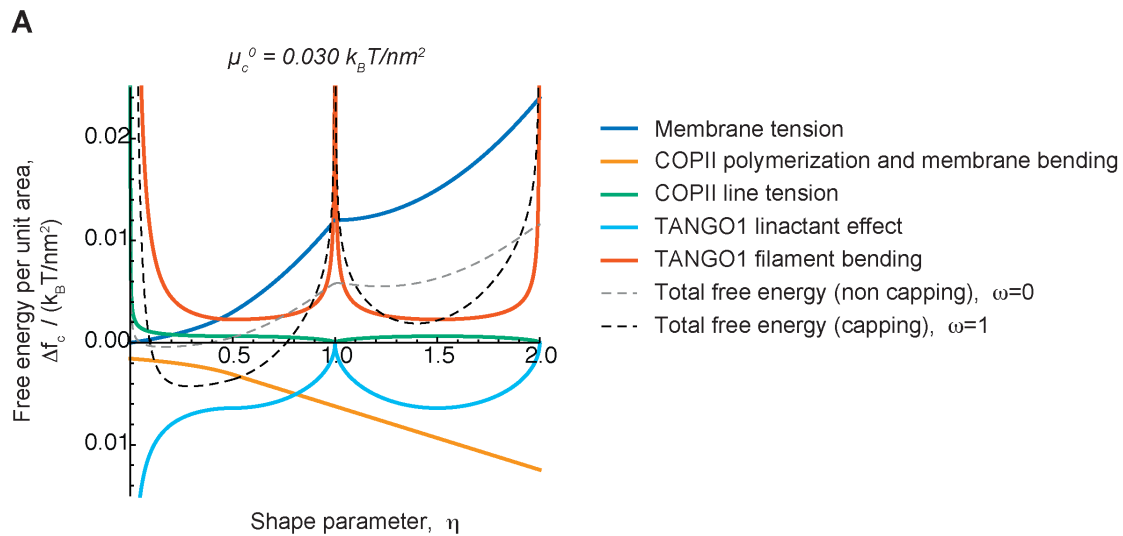

1434

1435

1436 **Figure 2–figure supplement 1. Different contributions to the free energy profile of a transport**

1437 **intermediate as a function of its shape and TANGO1 capping.**

1438 **(A)** The free energy per unit area of the transport intermediate-TANGO1 system,  $\Delta f_c$ , plotted as a function

1439 of the shape parameter,  $\eta$ , for the COPII coat binding energy,  $\mu_c^0 = 0.030 k_B T/nm^2$ , for both full COPII

1440 capping by TANGO1 ( $\omega = 1$ , black, dashed curve) and full uncapping ( $\omega = 0$ , gray, dashed curve), are

1441 shown, as in **Figure 2A**. Each separate contribution to the total free energy per unit area (**Equations**

1442 **(4,5)**) is individually represented: the contributions of (i) membrane tension (dark blue); (ii) COPII

1443 polymerization and membrane bending (orange); (iii) COPII line energy (green); (iv) TANGO1-mediated

1444 reduction of the COPII line energy (light blue); and (v) TANGO1 filament bending energy (vermillion). Plots

1445 (i–iii) correspond to the free energies described by **Equation (1)**; plot (iv) corresponds to the free energy

1446 described by **Equation (3)**; and plots (v) corresponds to the free energy described by **Equation (2)**. We

1447 considered no applied force,  $N = 0$ , and the rest of the elastic parameters used for the calculations are

1448 specified in **Table 1**.

1449 **Figure 5–figure supplement 1**

1450

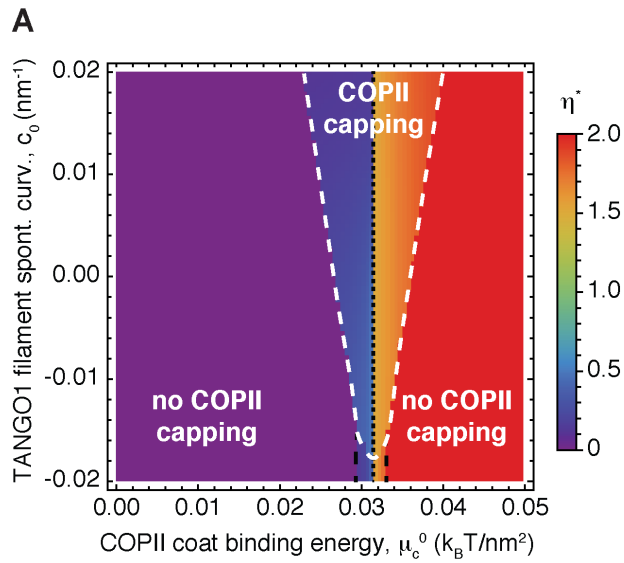

1451

1452

1453

**Figure 5–figure supplement 1. Shape diagram of the transport intermediate as a function of the TANGO1 filament spontaneous curvature.**

1454

1455

1456

1457

1458

1459

**(A)** Two-dimensional shape diagram indicating the shape of minimal elastic energy, represented by the optimal shape parameter,  $\eta^*$  (color-coded), and the state of TANGO1 capping (capping/uncapping transitions marked by thick, dashed, white lines). The shape diagram is plotted as a function of the COPII coat binding energy,  $\mu_c^0$ , and of the TANGO1 filament spontaneous curvature,  $c_0$ . There is no applied force ( $N = 0$ ) and the rest of the elastic parameters used for all the calculations are listed in **Table 1**.

1460 **Figure 6–figure supplement 1**

1461

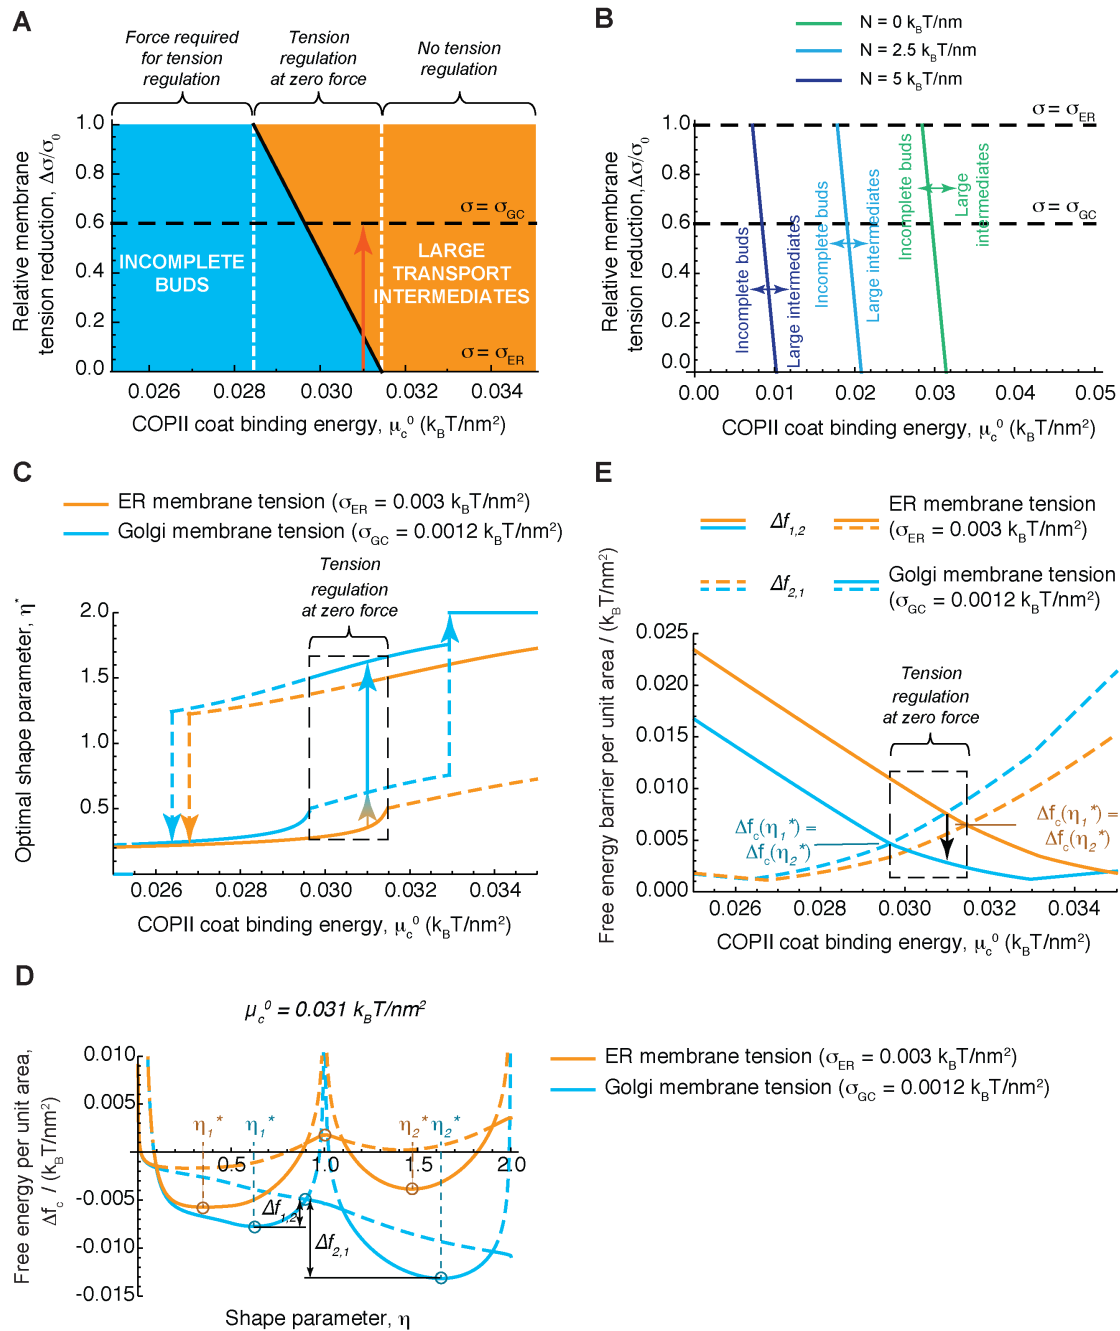

1462

1463

1464

1465

**Figure 6–figure supplement 1. Membrane tension regulation by TANGO1 can mediate procollagen export.**

1466 **(A)** Shape diagram showing the relative membrane tension reduction,  $\Delta\sigma/\sigma_0$ , as a function of the COPII coat binding energy,  $\mu_c^0$ , at zero applied force ( $N = 0$ ). The corresponding shapes are indicated as incomplete buds (including both flat membranes and shallow buds), shown in blue, or large transport intermediates, in orange. Three distinct regions are indicated in the diagram, as in **Figure 4A**, separated by vertical, dashed, white lines. The central region corresponds to the region of the parameter space where formation of large intermediates from incomplete buds can be triggered by a reduction in membrane tension. An example of such transitions, corresponding to relative tension reductions of 60% (from the measured ER tension,  $\sigma_{ER}$ , to the measured Golgi membrane tension,  $\sigma_{GC}$ ), is indicated by a red arrow. The right and left regions show no possibility of large intermediate formation mediated by membrane tension regulation. In the left region, such regulation is still possible provided a force is pulling on the bud (see text for details). **(B)** Shape diagram as in **(A)** for different values of the applied force,  $N$  (see legend). The corresponding shapes are indicated as incomplete buds (including both flat membranes and shallow

1478 buds), to the left of the transition lines, or large transport intermediates, to the right of the transition lines.  
1479 To illustrate how membrane tension reduction can trigger carrier elongation at different forces, the lines  
1480 corresponding to measured ER tension,  $\sigma_{ER}$ , and Golgi membrane tension,  $\sigma_{GC}$ , are indicated by black,  
1481 dashed lines. The right and left regions show no possibility of large intermediate formation mediated by  
1482 membrane tension regulation. In the left region, such regulation is still possible provided a force is pulling  
1483 on the bud (see text for details). **(C)** The optimal shape parameter,  $\eta^*$ , is plotted as a function of the COPII  
1484 coat binding energy,  $\mu_c^0$ , for two values of the membrane tension:  $\sigma = \sigma_{ER}$  (orange curves), and  $\sigma = \sigma_{GC}$   
1485 (blue curves). Globally stable shapes, for each case, are indicated by solid lines, whereas dashed lines  
1486 represent locally, metastable shapes. Within the tension regulation at zero force region of the diagram  
1487 (marked by the dashed, black box), a local, transient reduction in the membrane tension can lead to the  
1488 growth of the transport intermediate (marked by the orange to blue faded arrows). **(D)** The free energy  
1489 per unit area of the transport intermediate-TANGO1 system,  $\Delta f_c$ , is plotted as a function of the shape  
1490 parameter,  $\eta$ , for the COPII coat binding energy,  $\mu_c^0 = 0.031 k_B T / nm^2$ , for both full COPII capping by  
1491 TANGO1 ( $\omega = 1$ ) and full uncapping ( $\omega = 0$ ), and for two values of the membrane tension:  $\sigma = \sigma_{ER}$   
1492 (orange curves); and  $\sigma = \sigma_{GC}$  (blue curves). For each value of the shape parameter,  $\eta$ , the locally stable  
1493 state of TANGO1 capping/unapping (lower free energy) is represented by the corresponding solid curve,  
1494 whereas dashed curves indicate unstable states (higher free energy). The locally stable shapes, denoted  
1495 by  $\eta_1^*$  and  $\eta_2^*$  are indicated, as well as the free energy barriers,  $\Delta f_{1,2}$ , and  $\Delta f_{2,1}$ . **(E)** The free energy barriers  
1496 separating the incomplete bud from the large intermediate morphologies,  $\Delta f_{1,2}$  (solid lines), and  $\Delta f_{2,1}$   
1497 (dashed lines) (defined in **(D)**), are plotted as a function of the COPII coat binding energy,  $\mu_c^0$ , for two  
1498 values of the membrane tension:  $\sigma = \sigma_{ER}$  (orange curves), and  $\sigma = \sigma_{GC}$  (blue curves). Transition zone  
1499 where the two energy barriers are of the same height, and hence both incomplete buds and large transport  
1500 intermediates have the same free energy, are marked by a dashed, black box (tension regulation at zero  
1501 force region). An arrow illustrates how decreasing the membrane tension leads to a reduction of the  
1502 energy barrier for growth of the transport intermediate. Unless otherwise specified, the elastic parameters  
1503 used for all the calculations shown are listed in **Table 1**.

1504 **Movie 1**

1505

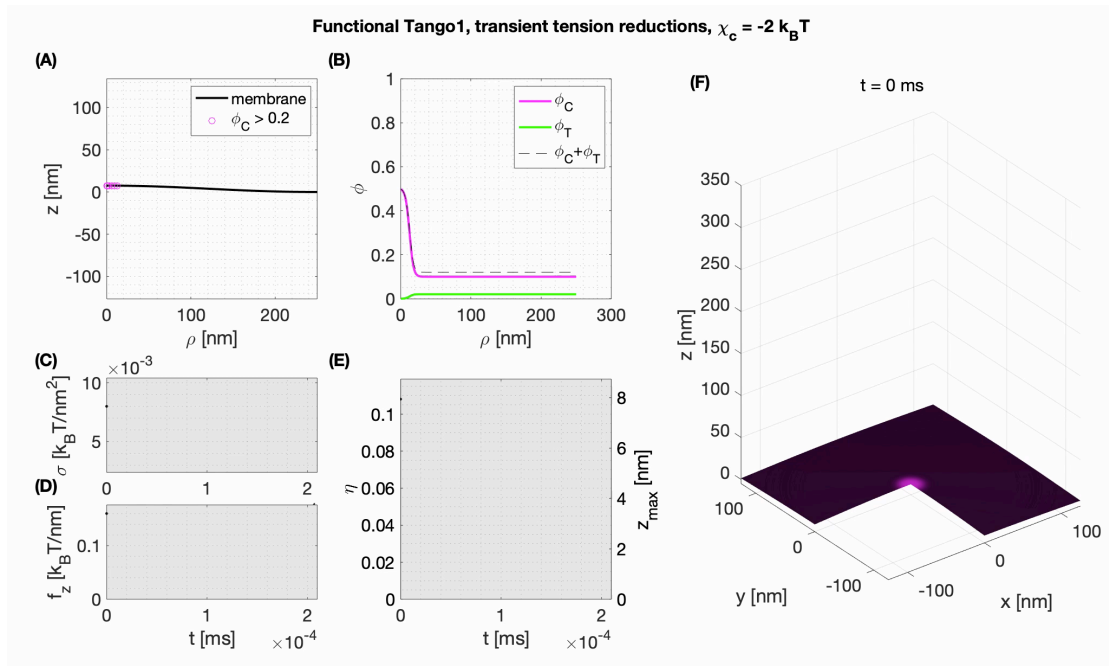

1506 **Movie 1. Membrane tension regulation by TANGO1 enables the formation of large procollagen-**  
 1507 **containing transport intermediates.**

1508 Dynamics of an elongated COPII-coated transport intermediate formation with functional TANGO1.  
 1509 Membrane tension is transiently reduced from  $\sigma = 0.008 k_B T/nm^2$  to  $\sigma = 0.004 k_B T/nm^2$  and back  
 1510  $\sigma = 0.008 k_B T/nm^2$  to allow the transition from a stable shallow bud to a stable “key-hole” shape, and  
 1511 then again to a stable “unduloid” shape of about 300 nm long, the typical size of a procollagen molecule.  
 1512 To mimic the presence of procollagen in the bud, a minimal neck radius is set at  $\rho_{col} = 7.5 nm$  (see  
 1513 **Appendix 1** for details). (A) Shape of the membrane and distribution of proteins of more than 20%  
 1514 surface coverage. (B) Distribution of COPII and TANGO1 surface coverage as a function of the radius  
 1515  $\rho$ . (C) Imposed membrane tension. (D) Imposed vertical point force,  $f_z$ , at  $\rho = 0$ . The value of  $f_z$  is non-  
 1516 zero only during the initial COPII nucleation phase marked in gray. (E) Shape factor and bud height as a  
 1517 function of time. (F) Three-dimensional reconstitution of the transport intermediate and distribution of  
 1518 COPII (magenta) and TANGO1 (green).

# Appendix 1: Computational dynamic model of TANGO1-mediated bulky cargo export

In this Appendix we derive a dynamic model of a lipid bilayer whose spontaneous curvature is dictated by the diffusion and interaction of two membrane bound-species. We specialized this model to COPII and TANGO1, show that simulation results recapitulate key features of experimental observations, and use the model to propose biophysical mechanisms at the origin of transport intermediate formation for procollagen export from the ER.

The proposed model extends the work of [15] to account for a second membrane-bound species and apply it to TANGO1-COPII complex assembly. We therefore focus our exposé on this novel aspect, and direct readers interested in the detailed underlying theory to [2, 9, 14, 15].

## 1 Onsager's variational approach: energetics, dissipation and power input

Our modeling approach is based on Onsager's variational formalism of dissipative dynamics [2, 9]. The fundamental principle consists in describing the time evolution of the system through a minimization process of energy released, energy dissipated, and energy exchanged by the system. In other words, if  $\dot{\mathcal{F}}$  is the rate of change of free energy,  $\mathcal{D}$  is the total dissipation potential, and  $\mathcal{P}_{\text{ext}}$  is the power input, the rate of change of the system can be obtained by minimizing at each time point the Rayleighian functional

$$\mathcal{R} = \dot{\mathcal{F}} + \mathcal{D} + \mathcal{P}_{\text{ext}}. \quad (\text{Eq. A1})$$

In this section, we define the energetic contributions to each of these quantities.

### 1.1 Free energy

We consider a lipid bilayer as a material surface parametrized by  $\mathbf{r}(\theta^\alpha, t)$ , where  $(\theta^1, \theta^2)$  are the Lagrangian surface coordinates, and  $t$  is the time. The state variable associated with the mechanical energy of the system is  $\mathbf{r}$ , while the state variables associated with the chemical energy of the systems are the local area fractions of COPII and TANGO1,  $\phi_c$  and  $\phi_t$ , respectively. Note that these latter are bounded and should satisfy  $\phi_c > 0$ ,  $\phi_t > 0$ , and  $0 \leq \phi_c + \phi_t \leq 1$ .

#### 1.1.1 Mechanical energy

The bending energy of the membrane is described by the classical Helfrich model with spontaneous curvature [3, 4, 8]

$$\mathcal{F}_{\text{bend}} = \int_{\Gamma} \frac{\kappa}{2} (J - C_c \phi_c)^2 dS, \quad (\text{Eq. A2})$$

where  $\kappa$  is the bending modulus,  $J$  is the total curvature (twice the mean curvature,  $H$ ) of the membrane, and the integration is performed over the entire membrane patch,  $\Gamma$ . Here we consider a local spontaneous curvature  $C_c \phi_c$  resulting from the presence of COPII complexes. We assume a linear dependence of the spontaneous curvature on COPII local coverage, with  $C_c = 2/R_c$  being the maximum spontaneous curvature induced by a full coverage of COPII ( $\phi_c = 1$ ) with preferred radius of curvature  $R_c$ .

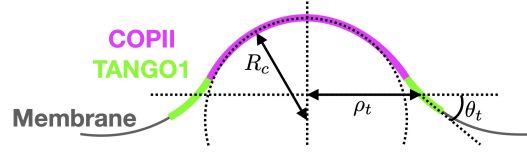

Figure A1: Schematic of a shallow COPII/TANGO1 bud and definition of the geometrical parameters favored by the proteins.

The total curvature  $J$  is a function of the state variable  $\mathbf{r}$ . Briefly, from standard differential geometry [5, 6] we have that the tangent vectors at each point of the membrane are  $\mathbf{g}_\alpha = \partial \mathbf{r} / \partial \theta^\alpha$ . They define the natural basis of the tangent space, from which the covariant components of the metric tensor are obtained  $g_{\alpha\beta} = \mathbf{g}_\alpha \cdot \mathbf{g}_\beta$ . Additionally the unit normal to the surface is  $\mathbf{n} = (\mathbf{g}_1 \times \mathbf{g}_2) / \sqrt{g}$ , where  $g = \det(g_{\alpha\beta})$ . From these definitions, one gets the components of the second fundamental form  $k_{\alpha\beta} = \mathbf{n} \cdot \partial \mathbf{g}_\alpha / \partial \theta^\beta$ , whose invariants are the total curvature  $J = \text{tr } \mathbf{k} = k_{\alpha\beta} g^{\alpha\beta}$ , and the Gaussian curvature  $K = \det \mathbf{k} = k_{\alpha\beta} g^{\beta\gamma}$ . Here  $g^{\beta\gamma}$  are the components of the inverse of the metric tensor, obtained from  $g_{\alpha\beta} g^{\beta\gamma} = \delta_\alpha^\gamma$ . Note that for simplicity, we have neglected the contribution of the Gaussian curvature to the bending energy in (Eq. A2).

Based on our experimental observations [11], TANGO1 proteins are assumed to favor a ring-like conformation with a specific radius of curvature  $\rho_t$  and a preferred angle with the plane of the ring  $\theta_t$  (see Fig. A1). As detailed later, we will restrict the model to axisymmetric shapes. Therefore for clarity, here we directly write an axisymmetric expression of the functional for the TANGO1 ring stiffness as

$$\mathcal{F}_{stif} = \int_{\Gamma} \left[ \frac{\kappa_\rho}{2} \left( \frac{1}{\rho} - \frac{1}{\rho_t} \right)^2 + \frac{\kappa_\theta}{2} (\theta - \theta_t)^2 \right] \phi_t dS, \quad (\text{Eq. A3})$$

where  $\kappa_\rho$  and  $\kappa_\theta$  are, respectively, the stiffness coefficients associated with the ring curvature  $1/\rho$  and angle with the membrane  $\theta$ .

### 1.1.2 Chemical energy

We consider two distinct membrane-bound species representing COPII and TANGO1 proteins. They are described by continuous surface fractions  $\phi_c$  and  $\phi_t$ , respectively. We consider the entropic mixing energy of the two proteins to be represented by a Flory–Huggins type energy such as

$$\mathcal{F}_{ent} = \int_{\Gamma} \frac{k_B T}{a_p} [\phi_c \ln \phi_c + \phi_t \ln \phi_t + (1 - \phi_c - \phi_t) \ln(1 - \phi_c - \phi_t)] dS, \quad (\text{Eq. A4})$$

where  $a_p$  is the molecular area of the proteins, assumed for simplicity to be identical for both proteins. The self-interaction and line energy of COPII proteins are

$$\mathcal{F}_c = \int_{\Gamma} \frac{\chi_c}{2a_p} \phi_c^2 + \frac{\Lambda_c}{2a_p} |\nabla \phi_c|^2 dS, \quad (\text{Eq. A5})$$

where  $\chi_c$  is negative for attractive interactions. The parameter  $\Lambda_c$  ensures a length-scale associated with the interface of the COPII domain: the spatial gradient of  $\phi_c$  is smoother for large values of  $\Lambda_c$ .

Similarly, we write the self-interaction and line energy of TANGO1 proteins as

$$\mathcal{F}_t = \int_{\Gamma} \frac{\chi_t}{2a_p} \phi_t^2 + \frac{\Lambda_t}{2a_p} |\nabla \phi_t|^2 dS. \quad (\text{Eq. A6})$$

Finally, the interactions between COPII and TANGO1 proteins are

$$\mathcal{F}_{ct} = \int_{\Gamma} \frac{\chi_{ct}}{2a_p} \phi_c \phi_t + \frac{\Lambda_{ct}}{2a_p} \phi_t |\nabla \phi_c|^2 dS, \quad (\text{Eq. A7})$$

where the first term represents the affinity between the two proteins, and the second term represents the affinity of TANGO1 for the COPII coat boundary. Combining the second term of (Eq. A7) with the second term of (Eq. A5), one can see that TANGO1 modulates the interfacial energy of COPII with an effective parameter  $\Lambda_c + \Lambda_{ct} \phi_t$ .

The total free energy is the sum of the protein and membrane contributions:

$$\mathcal{F} = \mathcal{F}_{bend} + \mathcal{F}_{stif} + \mathcal{F}_{ent} + \mathcal{F}_c + \mathcal{F}_t + \mathcal{F}_{ct}. \quad (\text{Eq. A8})$$

## 1.2 Dissipation Mechanisms

Dissipation of mechanical energy occurs through in-plane shear stress of the lipid bilayer as it dynamically deforms under the action of a Lagrangian velocity of the membrane  $\mathbf{V} = \partial \mathbf{r} / \partial t = \mathbf{v} + v_n \mathbf{n}$ , where  $\mathbf{v}$  and  $v_n$  are its tangential and normal components respectively. This membrane ‘‘flow’’ results in the time evolution metric tensor, whose time derivative in Lagrangian setting is the rate-of-deformation tensor of the surface [14]

$$\mathbf{d} = \frac{1}{2} \frac{\partial \mathbf{g}}{\partial t} = \frac{1}{2} (\nabla \mathbf{v} + \nabla \mathbf{v}^T) - v_n \mathbf{k}. \quad (\text{Eq. A9})$$

The first term, involving the membrane tangential velocity  $\mathbf{v}$  represents the contribution of the tangential flow to the membrane deformation. The last term, involving the normal velocity  $v_n$ , accounts for the shape change of the membrane. The rate of change of local area is  $\text{tr}(\mathbf{d}) = \nabla \cdot \mathbf{v} - v_n J$ , which is zero for an inextensible membrane. We consider the lipid bilayer to be in a fluid phase that can be approximated by an interfacial viscous Newtonian fluid [1]. Neglecting intermonolayer friction, and assuming membrane inextensibility, the dissipation potential by in-plane shear stress takes the form

$$\mathcal{D}_{\text{mech}} = \int_{\Gamma} \eta_m \mathbf{d} : \mathbf{d} dS, \quad (\text{Eq. A10})$$

where  $\eta_m$  is the in-plane viscosity of the lipid bilayer.

Dissipation of chemical energy occurs by protein diffusion along the membrane surface, described by the species diffusive velocities relative to the Lagrangian coordinates,  $w_c$  and  $w_t$  for COPII and TANGO1, respectively. Assuming for simplicity that the two proteins have the same molecular drag coefficient  $\xi$  and surface area  $a_p$ , the chemical dissipative potential of the system is

$$\mathcal{D}_{\text{chem}} = \int_{\Gamma} \frac{\xi}{2a_p} (\phi_c |\mathbf{w}_c|^2 + \phi_t |\mathbf{w}_t|^2) dS. \quad (\text{Eq. A11})$$

Given that the typical length scale of our system is well below the Saffman-Delbrück length scale ( $\sim 1-10 \mu\text{m}$ ), we can safely neglect dissipation arising from the friction between the membrane and the cytosol [1]. The total dissipation potential of the system is  $\mathcal{D} = \mathcal{D}_{\text{mech}} + \mathcal{D}_{\text{chem}}$ .

## 1.3 Power supplied

Mechanical power can only be supplied to our system through the boundary of the membrane patch  $\partial\Gamma$  in the form of edge tractions and moments. Defining  $\boldsymbol{\tau}$  as the unit tangent vector along  $\partial\Gamma$  so that  $\boldsymbol{\nu} = \boldsymbol{\tau} \times \mathbf{n}$ , the boundary tractions and moment power inputs are

$$\mathcal{P}_{\text{mech}} = - \int_{\partial\Gamma} (F_{\tau} \mathbf{v} \cdot \boldsymbol{\tau} + F_{\nu} \mathbf{v} \cdot \boldsymbol{\nu} + F_n v_n) dl + \int_{\partial\Gamma} M \boldsymbol{\nu} \cdot \dot{\mathbf{n}} dl, \quad (\text{Eq. A12})$$



where  $F_\tau$ ,  $F_\nu$  and  $F_n$  are the traction components at the boundary,  $M$  is the bending moment per unit length, and  $\dot{\mathbf{n}}$  is the material time derivative of the surface normal.

In this model, we assume that all proteins are membrane bound and provided at the boundary of the domain by a protein reservoir of fixed chemical potential. The chemical power supply is therefore written

$$\mathcal{P}_{\text{chem}} = \int_{\partial\Gamma} \left( \frac{\mu_c^0}{a_p} \phi_c \mathbf{w}_c + \frac{\mu_t^0}{a_p} \phi_t \mathbf{w}_t \right) \cdot \boldsymbol{\nu} dl, \quad (\text{Eq. A13})$$

where  $\mu_c^0$  and  $\mu_t^0$  are the fixed boundary chemical potentials of COPII and TANGO1, respectively. The total power supplied to the system is  $\mathcal{P}_{\text{ext}} = \mathcal{P}_{\text{mech}} + \mathcal{P}_{\text{chem}}$ .

## 2 Governing Dynamics

### 2.1 Protein surface transport

Based on the definitions of the free energies, we define the energy density  $W$  as  $\mathcal{F} = \int_\Gamma W dS$ . The chemical potentials of the two species can be written as  $\mu_i = a_p (W_{\phi_i} - \nabla \cdot W_{\nabla\phi_i})$ , with  $i = \{c, t\}$  [15]. Here  $W_{\phi_i}$  and  $W_{\nabla\phi_i}$  are the partial derivatives of  $W$  with respect to  $\phi_i$  and  $\nabla\phi_i$  respectively. The chemical potentials for each species are therefore

$$\mu_c = -a_p \kappa C_c (J - C_c \phi_c) + k_B T \ln \left( \frac{\phi_c}{1 - \phi_c - \phi_t} \right) + \chi_c \phi_c - (\Lambda_c + \Lambda_{ct} \phi_t) \nabla^2 \phi_c + \frac{\chi_{ct}}{2} \phi_t - \Lambda_{ct} \nabla \phi_t \cdot \nabla \phi_c, \quad (\text{Eq. A14})$$

and

$$\mu_t = \frac{a_p}{2} \left[ \kappa_\rho \left( \frac{1}{\rho} - \frac{1}{\rho_t} \right) + \kappa_\theta (\theta - \theta_t) \right] + k_B T \ln \left( \frac{\phi_t}{1 - \phi_c - \phi_t} \right) + \chi_t \phi_t - \Lambda_t \nabla^2 \phi_t + \frac{\chi_{ct}}{2} \phi_c + \frac{\Lambda_{ct}}{2} |\nabla \phi_c|^2, \quad (\text{Eq. A15})$$

respectively.

The diffusive velocity of the species  $i$  can be expressed as a function of the species chemical potential  $\mu_i$  by minimizing the Rayleighian with respect to  $\mathbf{w}_i$ , giving  $\mathbf{w}_i = -\nabla \mu_i / \xi$  [15]. The strong form of the transport equations for the proteins on an incompressible surface is therefore

$$\xi \dot{\phi}_i - \nabla \cdot (\phi_i \nabla \mu_i) = 0 \quad \text{with } i = \{c, t\}, \quad (\text{Eq. A16})$$

with the diffusive flux for each species given by

$$-\phi_c \nabla \mu_c = \left[ a_p \kappa C_c \nabla J - \frac{\chi_{ct}}{2} \nabla \phi_t \right] \phi_c - \left[ (\chi_c + a_p \kappa C_c^2 - \Lambda_{ct} \nabla^2 \phi_t) \phi_c + k_B T \frac{1 - \phi_t}{1 - \phi_c - \phi_t} \right] \nabla \phi_c + 2 \Lambda_{ct} \nabla \phi_t \phi_c \nabla^2 \phi_c + [(\Lambda_c + \Lambda_{ct} \phi_t) \phi_c] \nabla (\nabla^2 \phi_c), \quad (\text{Eq. A17})$$

and

$$-\phi_t \nabla \mu_t = - \left[ a_p S_{\rho\theta} + \frac{\chi_{ct}}{2} \nabla \phi_c + \Lambda_{ct} \nabla \phi_c \nabla^2 \phi_c \right] \phi_t - \left[ \chi_t \phi_t + k_B T \frac{1 - \phi_c}{1 - \phi_c - \phi_t} \right] \nabla \phi_t + (\Lambda_t \phi_t) \nabla (\nabla^2 \phi_t), \quad (\text{Eq. A18})$$

respectively. Here we defined  $S_{\rho\theta} = \kappa_\rho (1/\rho - 1/\rho_t) \nabla (1/\rho) + \kappa_\theta (\theta - \theta_t) \nabla \theta$  and  $\nabla^2$  is the surface Laplacian. These expressions highlight that COPII transport explicitly depends on the membrane curvature through the  $\nabla J$  term, while TANGO1 transport explicitly depends on the ring radius and its angle with the membrane through  $S_{\rho\theta}$ .

## 2.2 Membrane dynamics

To enforce local membrane incompressibility we introduce a Lagrange multiplier field  $\sigma$  that can be interpreted as the membrane tension [10]. Consequently, we aim at minimizing the Lagrangian functional

$$\mathcal{L} = \mathcal{R} + \int_{\Gamma} \sigma \operatorname{tr}(\mathbf{d}) dS = \dot{\mathcal{F}} + \mathcal{D} + \mathcal{P}_{\text{ext}} + \int_{\Gamma} \sigma \operatorname{tr}(\mathbf{d}) dS, \quad (\text{Eq. A19})$$

where  $\mathcal{R}$  is the Rayleighian defined in (Eq. A1). Following Tozzi et al. [15], the dissipation rate of the free energy  $\dot{\mathcal{F}}$  and the local area constraints can be expressed as functionals of the rate variables  $(\mathbf{w}, \mathbf{v}, v_n)$ . The governing equations for the membrane mechanics are obtained by minimizing (Eq. A19) with respect to  $(\mathbf{w}, \mathbf{v}, v_n)$ , and maximizing it with respect to  $\sigma$ . In the case of  $W = W_{\text{bend}}$ , this results in the well-known shape equation and incompressibility condition [13, 17]. A full analysis of the governing equation for the total energy density of the COPII/TANGO1 system is out of the scope of this paper. For practical purposes, in what follows we proceed to a numerical minimization of (Eq. A19).

## 3 Model implementation

### 3.1 Axisymmetric parametrization and numerical scheme

Details of the model implementation for a single species can be found in [15]. Briefly, we formulate the model in axisymmetric coordinates so that each material point of the membrane is expressed in terms of the distance to the axis of symmetry  $\rho(u, t)$  and of the axis of symmetry coordinate  $z(u, t)$ . Here  $u \in [0, 1]$  is the Lagrangian coordinate along the membrane arclength, and  $t$  is time. The Dirichlet boundary conditions in the axisymmetric system take the form

$$\rho(0, t) = 0; \quad z'(0, t) = 0; \quad z(1, t) = 0; \quad z'(1, t) = 0. \quad (\text{Eq. A20})$$

The fixed chemical potentials at the open boundary are ensured by

$$\phi_c(1, t) = \phi_c^0; \quad \phi'_c(1, t) = 0; \quad \phi_t(1, t) = \phi_t^0; \quad \phi'_t(1, t) = 0, \quad (\text{Eq. A21})$$

where  $\phi_c^0$  and  $\phi_t^0$  are the imposed protein densities of COPII and TANGO1, respectively, at the open boundary, mimicking protein reservoirs far from the budding site.

To solve numerically the coupled chemo-mechanical system, we employ a staggered approach where at each time step, we first solve the protein density field for a given membrane shape, and then update the shape at fixed membrane density distribution. The state variables are discretized using B-splines with cubic B-spline basis functions. The chemical problem is solved with the finite element method using a backward Euler discretization in time of the protein transport equations (Eq. A16), and Newton's method to solve the resulting non-linear system. The mechanical problem is solved for a given distribution of proteins by minimizing the incremental Lagrangian from (Eq. A19) with respect to space variables and maximizing with respect to the Lagrange multiplier.

### 3.2 Simulation and analysis protocols

After a preliminary parameter analysis informed by the physics of the problem (see also the main text for a discussion on parameters), we chose the reference set of parameters given in Table A1. Except stated otherwise, all results are obtained for these parameter values. All computations are done on an initially flat membrane patch of 250 nm radius.

Table A1: Model parameters

| Symbol                     | Parameter                                                | Value                                            |
|----------------------------|----------------------------------------------------------|--------------------------------------------------|
| <i>Material parameters</i> |                                                          |                                                  |
| $\kappa$                   | Membrane bending rigidity                                | $20 \text{ k}_B\text{T}$                         |
| $R_c$                      | Preferred radius of curvature of COPII                   | 35 nm                                            |
| $C_c$                      | COPII spontaneous curvature                              | $2/R_c \text{ nm}^{-1}$                          |
| $\rho_t$                   | TANGO1 preferred radius of curvature                     | 45 nm                                            |
| $\theta_t$                 | TANGO1 preferred angle of curvature                      | $\pi/4$                                          |
| $\kappa_\rho$              | TANGO1 ring radius rigidity                              | $120 \text{ k}_B\text{T}$                        |
| $\kappa_\theta$            | TANGO1 ring angle rigidity                               | $6.4 \times 10^{-4} \text{ k}_B\text{T nm}^{-2}$ |
| $a_p$                      | Characteristic area of a protein                         | $100 \text{ nm}^2$                               |
| $\chi_c$                   | COPII self-interaction coefficient                       | $-2 \text{ k}_B\text{T}$                         |
| $\chi_t$                   | TANGO1 self-interaction coefficient                      | $-1.2 \text{ k}_B\text{T}$                       |
| $\chi_{ct}$                | Affinity coefficient between COPII and TANGO 1           | $-0.4 \text{ k}_B\text{T}$                       |
| $\Lambda_c$                | COPII interfacial coefficient                            | $2 \text{ k}_B\text{T}$                          |
| $\Lambda_t$                | TANGO1 interfacial coefficient                           | $0.4 \text{ k}_B\text{T}$                        |
| $\Lambda_{ct}$             | Coupling interfacial coefficient                         | $0.4 \text{ k}_B\text{T}$                        |
| $\eta_m$                   | Membrane viscosity                                       | $5 \times 10^{-9} \text{ N s m}^{-1}$            |
| $\xi$                      | Molecular drag coefficient ( $= 2\pi\eta_m$ )            | $3.14 \times 10^{-8} \text{ N s m}^{-1}$         |
| <i>Model constraints</i>   |                                                          |                                                  |
| $\phi_c^0$                 | COPII protein surface fraction at the open boundary      | 0.1                                              |
| $\phi_t^0$                 | TANGO1 protein surface fraction at the open boundary     | 0.02                                             |
| $\sigma$                   | Membrane tension                                         | $0.004 - 0.0096 \text{ k}_B\text{T/nm}^2$        |
| $f_z$                      | Vertical axial force (applied for nucleation)            | $0 - 0.56 \text{ k}_B\text{T/nm}$                |
| $\rho_{\text{col}}$        | Minimal neck radius in presence of procollagen molecules | 7.5 nm                                           |

*Stable equilibrium.* We assume that an equilibrium shape is reached if the maximum displacement between two time-steps of each material points is below  $5 \times 10^{-3} \text{ nm}$  for more than ten time-steps in a row over a cumulative time larger than 1ms.

*Shape parameter.* To facilitate a quantitative comparison between the end-states of the system obtained for different sets of parameters, we use the shape parameter, which is essentially the maximum height of the bud normalized by the preferred diameter of curvature of COPII  $\eta = z_{\text{max}}/2R_c$  (see also main text).

*Coat nucleation.* In our system, the flat membrane state is a locally (sometimes globally) stable equilibrium state. This means that a perturbation needs to be applied to initiate the nucleation of COPII coats. To ensure a reproducible perturbation protocol, we define a criteria for COPII coat nucleation such as the average surface density of COPII within a surface area  $A_{\text{nuc}} = \pi(25 \text{ nm})^2$  around the axis of symmetry must satisfy  $\int_{A_{\text{nuc}}} \phi_c dS > 0.75 A_{\text{nuc}}$ . Starting from a flat membrane patch with homogeneous distribution of species, a small upward point force of  $f_z = 0.16 \text{ k}_B\text{T/nm}$  is applied at  $\rho = 0$ . The force induces membrane deformation and initiates the recruitment of COPII. If the force is sufficient to nucleate a COPII coat as defined above, the point force is set back to zero, and the system is free to evolve. Alternatively, if an equilibrium is reached but the nucleation criteria is not satisfied, we gradually increase  $f_z$  until either a COPII coat is nucleated or until  $f_z > 0.56 \text{ k}_B\text{T/nm}$ , in which case we assume the flat membrane to be the stable state. The up-ward point force is implemented within the arclength parametrization by setting  $F_n(0, t) = f_z$  in the power supply (Eq. A12).

*Neck closure.* In the cases where the transport carrier closes, no equilibrium is reached. Consequently, we assume that if the neck radius goes below 5 nm, we reach the small length scale limit of the continuum modeling approach, and assume neck closure. Because the neck closure event happens at different times after the neck snap-through, in order to facilitate the comparison of the carrier height in a systematic manner in Fig. A3, we take  $\eta$  at the minimum

bud height after the neck snaps.

*Prevention of neck closure by collagen molecules.* In simulations where procollagen molecules prevent the total closure, an energy penalty  $\int_{\Gamma} 10^{-3} \kappa / (\rho - \rho_{\text{col}})^2 dS$  is imposed on the portion of the membrane  $u \in [0.1; 0.8]$  using a hyperbolic tangent.

## 4 Results and discussion

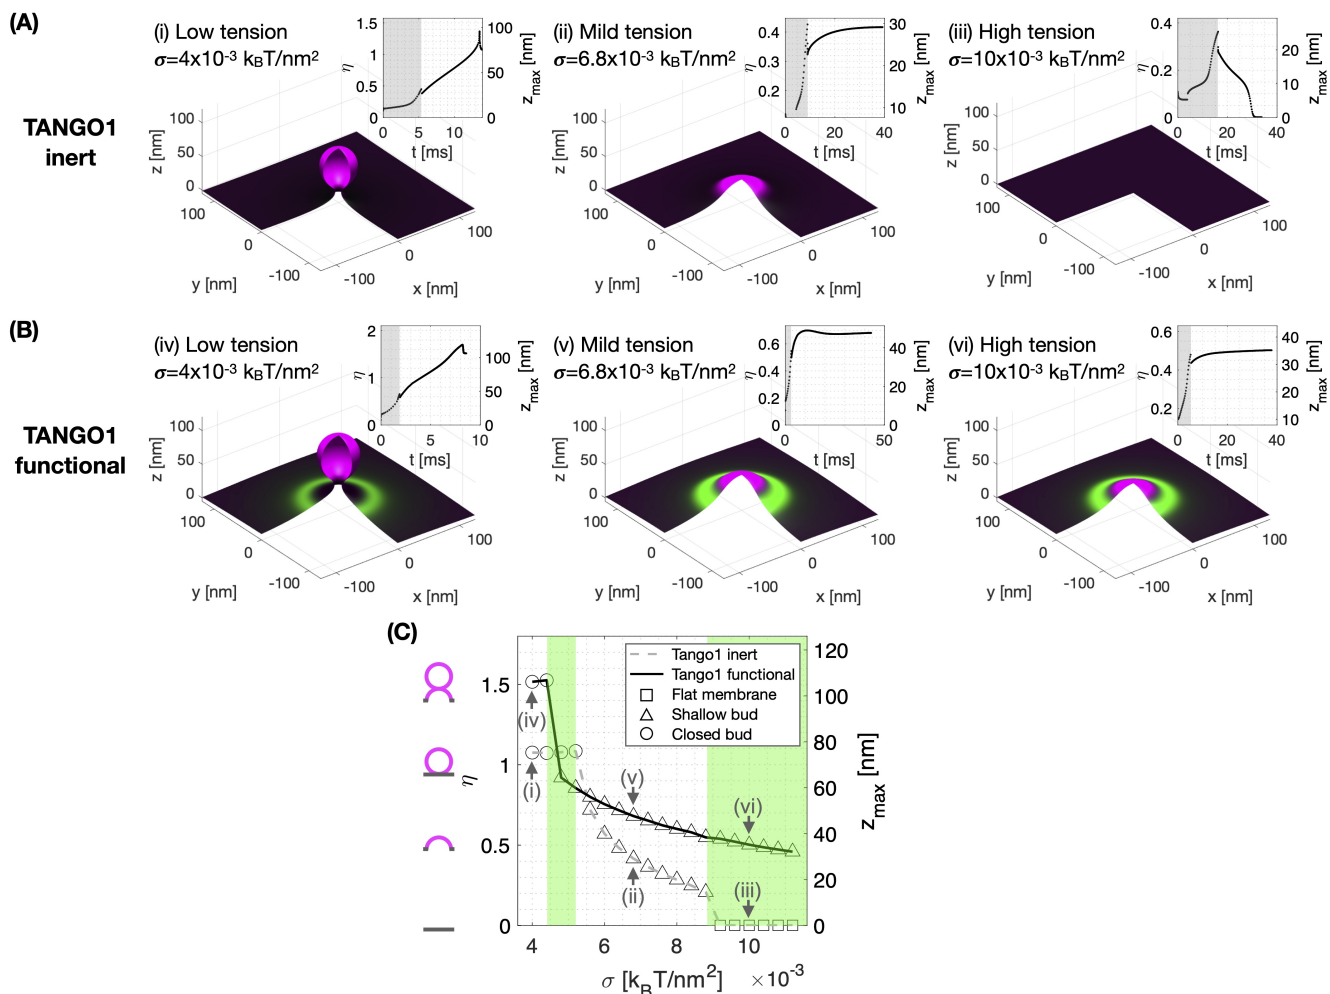

Figure A2: Computational results show that TANGO1 forms stable rings around COPII coats, and favors stable shallow buds over a larger range of membrane tension. (A, B) Final stable shapes at different membrane tensions for (A) inert TANGO1 but functional COPII and (B) functional TANGO1 and COPII. Inserts show the shape factor ( $\eta = z_{\text{max}}/2R_c$ ) and height ( $z_{\text{max}}$ ) as a function of time (gray regions indicate the perturbation stage where an incremental upward point force is applied to initiate the COPII coat nucleation). (C) Shape factor and bud height as a function of membrane tension. Each symbol represents the final state of a simulation with a different membrane tension (lines are guides for the eye). The final shape of the COPII coated transport intermediate is classified as stable closed spherical bud (circles), stable shallow bud (triangles), or stable flat membrane (squares). Green regions highlight tension regimes where TANGO1 mediates the regulation of the final membrane shape. All results obtained for parameters as given in Table A1, and  $\chi_c = -1.9 \text{ k}_B\text{T}$ . (See corresponding Supporting Movies 1-6 for a dynamic representation of the simulations).

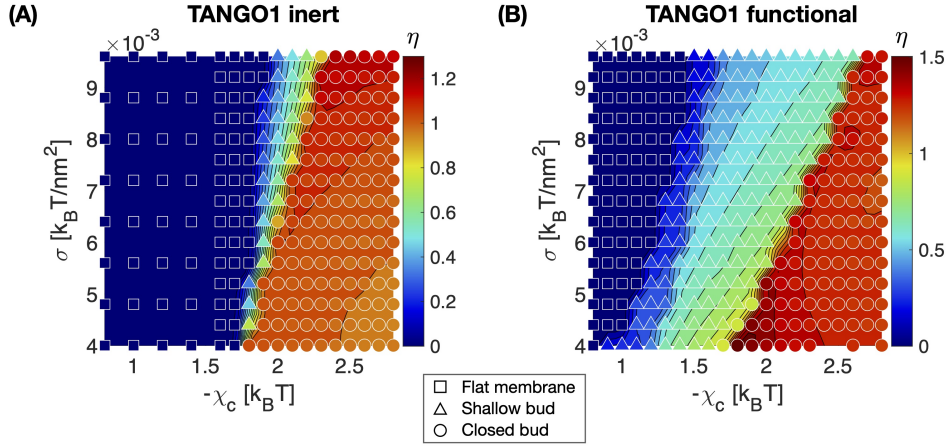

Figure A3: TANGO1 significantly widens the range of COPII self-interaction and membrane tension at which shallow buds are stable. Shape factor (color code) and final state (symbol) as a function of membrane tension ( $\sigma$ ) and COPII self-interaction ( $\chi_c$ ). (A) Inert TANGO1 but functional COPII. (B) Functional TANGO1 and COPII. Each symbol represents the final state of a dynamic simulation, while isocontours and colors are interpolated from the values of  $\eta$  at each symbol.

We first investigate the ability of COPII complex alone to generate spherical carriers. This corresponds to the control case where TANGO1 is treated as an inert species that only contributes to the entropic energy ( $\chi_t$ ,  $\chi_{ct}$ ,  $\kappa_\rho$ ,  $\kappa_\theta$  are set to zero). As shown in Fig. A2A, the final shape of the carrier depends on the membrane tension  $\sigma$ . At low membrane tension (Fig. A2A(i) and Supporting Movie 1), a COPII coat polymerizes and induces membrane curvature such that a spherical carrier forms and closes with a neck radius below the threshold of 5 nm. At intermediate and high membrane tensions, the COPII coats do not reach closure, and either stabilize a shallow state (Fig. A2A(ii) and Supporting Movie 2) or depolymerize and flatten out (Fig. A2A(iii) and Supporting Movie 3), respectively. As expected, the inert TANGO1 species does not play a role outside of entropically slowing down COPII dynamics. The result of our dynamic simulations with inert TANGO1 extend the conclusion of previous models obtained at equilibrium that highlighted the role of membrane tension as a regulator of bud formation [7, 12, 16].

In the presence of functional TANGO1, we observe the formation of a stable TANGO1 ring around the COPII coats (Fig. A2B and Supporting Movies 4-6). Importantly, we find that at high tension (Fig. A2B(vi)), TANGO1 prevents the membrane to flatten out by stabilizing the COPII coat in a stable shallow bud. Such TANGO1-assisted transport carrier regulation is better seen in Fig. A2C, where the bud height and final states are plotted as a function of the membrane tension for both inert and functional TANGO1 simulations. We find that functional TANGO1 not only increases the overall bud height compared to inert TANGO1, but also widens the range of tensions at which shallow buds are stable, both at high and intermediate tension regimes (green regions in Fig. A2C). This effect is critical at intermediate tensions corresponding to the transition from shallow to closed buds: the presence of functional TANGO1 lowers the minimum membrane tension required to close a bud, therefore indicating that TANGO1 could potentially play a role in tension-regulated transport intermediate formation.

To better understand the competition between membrane tension and COPII coat polymerization during transport carrier formation, we show in Fig. A3 the final carrier states and shape factor as a function of membrane tension ( $\sigma$ ) and COPII self-interaction coefficient ( $\chi_c$ ) for both inert and active TANGO1. We find that at low COPII self-interaction, the COPII coat either does not nucleate during the initial perturbation stage, or does nucleate but cannot provide enough bending energy to stabilize the membrane curvature against the membrane tension, thus resulting in a flat membrane ( $\eta = 0$ ). At high COPII self-interaction, the nucleated coat successfully works against membrane tension to generate membrane curvature, generating a closed spherical bud. At intermediate COPII self-interaction, we find a transition region where the deformed membrane stabilizes as an open, shallow

bud. Interestingly, the presence of functional TANGO1 dramatically widens the parameter space at which stable shallow buds are obtained. Importantly, the phase boundary at the transition from shallow to closed bud now spans a larger range of membrane tension and COPII self-interaction. Note that the COPII self-interaction parameter  $\chi_c$  is conceptually equivalent to  $\mu_c^0$  in the equilibrium model presented in the main text. Therefore the numerical results shown in Fig. A3 are in a good qualitative agreement with the equilibrium model results (Fig. 4A in the main text). Despite the different assumptions underlying the computational dynamic and equilibrium models, their qualitative agreement highlights the relevance of their common physical mechanisms to TANGO1-mediated assembly of procollagen-containing transport intermediates.

These observations suggest that stable shallow COPII buds surrounded by TANGO1 rings can remain stable in the ER, possibly facilitating the recruitment and packaging of procollagens to ERES. Additionally, our results suggest that a shallow bud stabilized by TANGO1 could close into a spherical carrier if the membrane tension is transiently reduced. Such tension reduction hypothesis is supported experimentally by the recruitment of ERGIC53-containing membrane vesicles by TANGO1 rings through the NRZ tether complex [11].

In summary, we outlined here the fundamentals of a full dynamic model for lipid bilayers with two membrane-bound species (TANGO1 and COPII complexes, in particular). We applied this model to the study of how TANGO1 can modulate the formation of COPII-coated transport intermediates. Our results are in a good qualitative agreement with the results presented in the main text obtained by using an analytical equilibrium model. A full parameter exploration of this model is beyond the scope of this article. However, we expect that the dynamic model outlined here will be very valuable to test new hypotheses based on ongoing and future experimental results on this and other intriguing cellular processes.

## Supporting movie captions

Movies 1-6 are the dynamic simulations corresponding to the end states shown in pannels (i-vi) of Fig. A2 respectively.

**Supporting movie 1:** Dynamic of COPII bud formation with inert TANGO1 at low membrane tension ( $\sigma = 4 \text{ k}_B\text{T}/\text{nm}^2$ ) and intermediate COPII self interaction ( $\chi_c = -1.9 \text{ k}_B\text{T}$ ). The final state is a closed bud. (A) Shape of the membrane and distribution of proteins of more than 20% surface coverage. (B) Distribution of COPII and TANGO1 surface coverage as a function of the radius  $\rho$ . (C) Imposed membrane tension. (D) Imposed vertical point force ( $f_z$ ) at  $\rho = 0$ . The value of  $f_z$  is non-zero only during the initial COPII nucleation phase marked in gray. (E) Shape factor and bud height as a function of time. (E) Three-dimensional reconstitution of the bud and distribution of COPII (magenta) and TANGO1 (green).

**Supporting movie 2:** Dynamic of COPII bud formation with inert TANGO1 at intermediate membrane tension ( $\sigma = 6.8 \text{ k}_B\text{T}/\text{nm}^2$ ) and intermediate COPII self interaction ( $\chi_c = -1.9 \text{ k}_B\text{T}$ ). The final state is a stable shallow bud. (A) Shape of the membrane and distribution of proteins of more than 20% surface coverage. (B) Distribution of COPII and TANGO1 surface coverage as a function of the radius  $\rho$ . (C) Imposed membrane tension. (D) Imposed vertical point force ( $f_z$ ) at  $\rho = 0$ . The value of  $f_z$  is non-zero only during the initial COPII nucleation phase marked in gray. (E) Shape factor and bud height as a function of time. (E) Three-dimensional reconstitution of the bud and distribution of COPII (magenta) and TANGO1 (green).

**Supporting movie 3:** Dynamic of COPII bud formation with inert TANGO1 at high membrane tension ( $\sigma = 10 \text{ k}_B\text{T}/\text{nm}^2$ ) and intermediate COPII self interaction ( $\chi_c = -1.9 \text{ k}_B\text{T}$ ). The final state is a stable flat membrane. (A) Shape of the membrane and distribution of proteins of more than 20% surface coverage. (B) Distribution of COPII

and TANGO1 surface coverage as a function of the radius  $\rho$ . (C) Imposed membrane tension. (D) Imposed vertical point force ( $f_z$ ) at  $\rho = 0$ . The value of  $f_z$  is non-zero only during the initial COPII nucleation phase marked in gray. (E) Shape factor and bud height as a function of time. (E) Three-dimensional reconstitution of the bud and distribution of COPII (magenta) and TANGO1 (green).

**Supporting movie 4:** Dynamic of COPII bud formation with functional TANGO1 at low membrane tension ( $\sigma = 4 \text{ k}_B\text{T}/\text{nm}^2$ ) and intermediate COPII self interaction ( $\chi_c = -1.9 \text{ k}_B\text{T}$ ). The final state is a closed bud. (A) Shape of the membrane and distribution of proteins of more than 20% surface coverage. (B) Distribution of COPII and TANGO1 surface coverage as a function of the radius  $\rho$ . (C) Imposed membrane tension. (D) Imposed vertical point force ( $f_z$ ) at  $\rho = 0$ . The value of  $f_z$  is non-zero only during the initial COPII nucleation phase marked in gray. (E) Shape factor and bud height as a function of time. (E) Three-dimensional reconstitution of the bud and distribution of COPII (magenta) and TANGO1 (green).

**Supporting movie 5:** Dynamic of COPII bud formation with functional TANGO1 at intermediate membrane tension ( $\sigma = 6.8 \text{ k}_B\text{T}/\text{nm}^2$ ) and intermediate COPII self interaction ( $\chi_c = -1.9 \text{ k}_B\text{T}$ ). The final state is a stable shallow bud. (A) Shape of the membrane and distribution of proteins of more than 20% surface coverage. (B) Distribution of COPII and TANGO1 surface coverage as a function of the radius  $\rho$ . (C) Imposed membrane tension. (D) Imposed vertical point force ( $f_z$ ) at  $\rho = 0$ . The value of  $f_z$  is non-zero only during the initial COPII nucleation phase marked in gray. (E) Shape factor and bud height as a function of time. (E) Three-dimensional reconstitution of the bud and distribution of COPII (magenta) and TANGO1 (green).

**Supporting movie 6:** Dynamic of COPII bud formation with functional TANGO1 at high membrane tension ( $\sigma = 10 \text{ k}_B\text{T}/\text{nm}^2$ ) and intermediate COPII self interaction ( $\chi_c = -1.9 \text{ k}_B\text{T}$ ). The final state is a stable shallow bud. (A) Shape of the membrane and distribution of proteins of more than 20% surface coverage. (B) Distribution of COPII and TANGO1 surface coverage as a function of the radius  $\rho$ . (C) Imposed membrane tension. (D) Imposed vertical point force ( $f_z$ ) at  $\rho = 0$ . The value of  $f_z$  is non-zero only during the initial COPII nucleation phase marked in gray. (E) Shape factor and bud height as a function of time. (E) Three-dimensional reconstitution of the bud and distribution of COPII (magenta) and TANGO1 (green).

## References

- [1] M. Arroyo and A. DeSimone. Relaxation dynamics of fluid membranes. *Physical Review E*, 79(3):031915, Mar. 2009. doi: 10.1103/PhysRevE.79.031915.
- [2] M. Arroyo, N. Walani, A. Torres-Sánchez, and D. Kaurin. Onsager’s Variational Principle in Soft Matter: Introduction and Application to the Dynamics of Adsorption of Proteins onto Fluid Membranes. In D. J. Steigmann, editor, *The Role of Mechanics in the Study of Lipid Bilayers*, CISM International Centre for Mechanical Sciences, pages 287–332. Springer International Publishing, Cham, 2018. ISBN 978-3-319-56348-0. doi: 10.1007/978-3-319-56348-0\_6.
- [3] F. Campelo, C. Arnarez, S. J. Marrink, and M. M. Kozlov. Helfrich model of membrane bending: From Gibbs theory of liquid interfaces to membranes as thick anisotropic elastic layers. *Advances in Colloid and Interface Science*, 208:25–33, June 2014. ISSN 0001-8686. doi: 10.1016/j.cis.2014.01.018.
- [4] M. Chabanon, J. C. Stachowiak, and P. Rangamani. Systems biology of cellular membranes: A convergence with biophysics. *WIREs Systems Biology and Medicine*, page e01386, Apr. 2017. ISSN 19395094. doi: 10.1002/wsbm.1386.
- [5] M. Deserno. Fluid lipid membranes: From differential geometry to curvature stresses. *Chemistry and Physics of Lipids*, 185:11–45, Jan. 2015. ISSN 0009-3084. doi: 10.1016/j.chemphyslip.2014.05.001.

- [6] M. P. do Carmo. *Differential Geometry of Curves and Surfaces: Revised and Updated Second Edition*. Courier Dover Publications, Dec. 2016. ISBN 978-0-486-81797-2.
- [7] J. E. Hassinger, G. Oster, D. G. Drubin, and P. Rangamani. Design principles for robust vesiculation in clathrin-mediated endocytosis. *Proceedings of the National Academy of Sciences*, page 201617705, Jan. 2017. ISSN 0027-8424, 1091-6490. doi: 10.1073/pnas.1617705114.
- [8] W. Helfrich. Elastic properties of lipid bilayers: Theory and possible experiments. *Zeitschrift fur Naturforschung. Teil C*, 28(11):693–703, 1973. doi: 10.1515/znc-1973-11-1209.
- [9] M. Rahimi and M. Arroyo. Shape dynamics, lipid hydrodynamics, and the complex viscoelasticity of bilayer membranes. *Physical Review E*, 86(1):011932, July 2012. doi: 10.1103/PhysRevE.86.011932.
- [10] P. Rangamani, K. K. Mandadap, and G. Oster. Protein-induced membrane curvature alters local membrane tension. *Biophysical Journal*, 107(3):751–762, Aug. 2014. ISSN 1542-0086. doi: 10.1016/j.bpj.2014.06.010.
- [11] I. Raote, M. Ortega-Bellido, A. J. Santos, O. Foresti, C. Zhang, M. F. Garcia-Parajo, F. Campelo, and V. Malhotra. TANGO1 builds a machine for collagen export by recruiting and spatially organizing COPII, tethers and membranes. *eLife*, 7:e32723, Mar. 2018. ISSN 2050-084X. doi: 10.7554/eLife.32723.
- [12] M. Saleem, S. Morlot, A. Hohendahl, J. Manzi, M. Lenz, and A. Roux. A balance between membrane elasticity and polymerization energy sets the shape of spherical clathrin coats. *Nature Communications*, 6(1): 1–10, Feb. 2015. ISSN 2041-1723. doi: 10.1038/ncomms7249.
- [13] D. Steigmann, E. Baesu, R. E. Rudd, J. Belak, and M. McElfresh. On the variational theory of cell-membrane equilibria. *Interfaces and Free Boundaries*, 5(4):357–366, 2003.
- [14] A. Torres-Sánchez, D. Millán, and M. Arroyo. Modelling fluid deformable surfaces with an emphasis on biological interfaces. *Journal of Fluid Mechanics*, page In press, 2019.
- [15] C. Tozzi, N. Walani, and M. Arroyo. Out-of-equilibrium mechanochemistry and self-organization of fluid membranes interacting with curved proteins. *New Journal of Physics*, 21(9):093004, Sept. 2019. ISSN 1367-2630. doi: 10.1088/1367-2630/ab3ad6.
- [16] N. Walani, J. Torres, and A. Agrawal. Endocytic proteins drive vesicle growth via instability in high membrane tension environment. *Proceedings of the National Academy of Sciences*, 112(12):E1423–E1432, Mar. 2015. ISSN 0027-8424, 1091-6490. doi: 10.1073/pnas.1418491112.
- [17] O.-Y. Zhong-can and W. Helfrich. Bending energy of vesicle membranes: General expressions for the first, second, and third variation of the shape energy and applications to spheres and cylinders. *Physical Review A*, 39(10):5280–5288, May 1989. doi: 10.1103/PhysRevA.39.5280.
